# Supplementary material for: Shotgun proteomics reveals specific modulated protein patterns in tears of patients with primary open angle glaucoma naïve to therapy
Source: Royal Society of Chemistry journal article supplement (doi:10.1039/c3mb25463a), 2013-03-22
Supplement: c3mb25463a.xlsx [file c3mb25463a.xlsx]

## Sheet: TableS1_Rev1
protein.name	Replicate	protein.score	protein.avgMass	protein.MatchedProducts	protein.MatchedPeptides	protein.seqCover(%)	peptide.modification	peptide.seq	peptide.seqStart	peptide.seqLength	peptide.MatchedProducts	peptide.score	precursor.z	precursor.mz
sp|P63104|1433Z_HUMAN 14-3-3 protein zeta/delta OS=Homo sapiens GN=YWHAZ PE=1 SV=1	POAG-Rep-2	133.87	27745	28	9	35.1		NLLSVAYK	41	8	6	44.8	2	454.262
	POAG-Rep-2	133.87	27745	28	9	35.1		FLIPNASQAESK	103	12	6	56.5	2	652.852
	POAG-Rep-2	133.87	27745	28	9	35.1		TEGAEK	68	6	2	14.93	1	634.31
	POAG-Rep-2	133.87	27745	28	9	35.1		TAFDEAIAELDTLSEESYK	193	19	6	35.72	3	711.345
	POAG-Rep-2	133.87	27745	28	9	35.1		IETELR	85	6	1	14.93	2	380.711
	POAG-Rep-2	133.87	27745	28	9	35.1		QQMAR	75	5	1	14.64	1	633.317
	POAG-Rep-2	133.87	27745	28	9	35.1		SVTEQGAELSNEERNLLSVAYK	27	22	6	25.68	3	813.081
	POAG-Rep-2	133.87	27745	28	9	35.1		GDYYRYLAEVAAGDDK	122	16	3	27.9	4	452.21
	POAG-Rep-2	133.87	27745	28	9	35.1	Oxidation+M(2)	EMQPTHPIR	158	9	3	34.3	3	375.521
sp|P01009|A1AT_HUMAN Alpha-1-antitrypsin OS=Homo sapiens GN=SERPINA1 PE=1 SV=3	CTRL-Rep-1	197.69	46736	25	7	16.03		ITPNLAEFAFSLYR	49	14	9	116.89	2	821.434
	CTRL-Rep-1	197.69	46736	25	7	16.03		LSITGTYDLK	314	10	5	30.67	2	555.806
	CTRL-Rep-1	197.69	46736	25	7	16.03	Carbamidomethyl+C(9)	LGMFNIQHCK	247	10	4	30.67	3	416.534
	CTRL-Rep-1	197.69	46736	25	7	16.03		GTQGK	187	5	1	14.66	1	490.26
	CTRL-Rep-1	197.69	46736	25	7	16.03		VFSNGADLSGVTEEAPLK	334	18	4	18.44	2	917.466
	CTRL-Rep-1	197.69	46736	25	7	16.03		IVDLVK	192	6	2	29.61	2	343.723
	CTRL-Rep-1	197.69	46736	25	7	16.03		LVDK	149	4	1	14.37	1	474.287
	CTRL-Rep-3	181.59	46736	31	8	22.25		ITPNLAEFAFSLYR	49	14	9	80.91	2	821.434
	CTRL-Rep-3	181.59	46736	31	8	22.25		LSITGTYDLK	314	10	5	30.25	2	555.804
	CTRL-Rep-3	181.59	46736	31	8	22.25		AVLTIDEK	359	8	7	44.42	2	444.753
	CTRL-Rep-3	181.59	46736	31	8	22.25		GTQGK	187	5	1	14.5	1	490.258
	CTRL-Rep-3	181.59	46736	31	8	22.25		VFSNGADLSGVTEEAPLK	334	18	6	39.75	2	917.467
	CTRL-Rep-3	181.59	46736	31	8	22.25	Carbamidomethyl+C(9)	LGMFNIQHCK	247	10	3	45.02	2	624.303
	CTRL-Rep-3	181.59	46736	31	8	22.25		ELDR	198	4	1	14.2	1	532.273
	CTRL-Rep-3	181.59	46736	31	8	22.25		TLNQPDSQLQLTTGNGLFLSEGLK	125	24	5	20.94	3	858.779
	POAG-Rep-1	189.16	46736	36	9	18.18		ITPNLAEFAFSLYR	49	14	8	83.24	2	821.433
	POAG-Rep-1	189.16	46736	36	9	18.18		AVLTIDEK	359	8	6	37.3	2	444.754
	POAG-Rep-1	189.16	46736	36	9	18.18		VFSNGADLSGVTEEAPLK	334	18	5	26.02	2	917.468
	POAG-Rep-1	189.16	46736	36	9	18.18		ELDRDTVFALVNYIFFK	198	17	4	27.59	3	697.368
	POAG-Rep-1	189.16	46736	36	9	18.18		LSITGTYDLK	314	10	4	30.88	2	555.804
	POAG-Rep-1	189.16	46736	36	9	18.18		LSSWVLLMK	258	9	3	34.57	2	538.803
	POAG-Rep-1	189.16	46736	36	9	18.18	Phosphoryl STY(4)	AVLTIDEK	359	8	3	45.08	2	484.738
	POAG-Rep-1	189.16	46736	36	9	18.18	Phosphoryl STY(9)	LQHLENELTHDIITK	283	15	3	21.52	2	942.471
	POAG-Rep-1	189.16	46736	36	9	18.18	Oxidation+M(9)	FNKPFVFLMIEQNTK	389	15	3	21.52	2	936.499
	POAG-Rep-2	159.83	46736	33	8	22.97		ITPNLAEFAFSLYR	49	14	9	71.1	2	821.433
	POAG-Rep-2	159.83	46736	33	8	22.97		FLENEDRR	298	8	7	44.8	2	539.768
	POAG-Rep-2	159.83	46736	33	8	22.97		VFSNGADLSGVTEEAPLK	334	18	6	30.82	2	917.47
	POAG-Rep-2	159.83	46736	33	8	22.97	Carbamidomethyl+C(9)	LGMFNIQHCK	247	10	3	30.61	3	416.545
	POAG-Rep-2	159.83	46736	33	8	22.97		LSITGTYDLK	314	10	3	40.61	2	555.806
	POAG-Rep-2	159.83	46736	33	8	22.97		AVLTIDEK	359	8	6	69.3	2	444.752
	POAG-Rep-2	159.83	46736	33	8	22.97		TLNQPDSQLQLTTGNGLFLSEGLKLVDK	125	28	4	19.43	3	1010.53
	POAG-Rep-2	159.83	46736	33	8	22.97		LENEDRR	299	7	0	0.88	2	466.23
sp|P62736|ACTA_HUMAN Actin	CTRL-Rep-1	471.09	42009	45	9	18.04		AGFAGDDAPR	20	10	11	111.74	2	488.726
	CTRL-Rep-1	471.09	42009	45	9	18.04		AVFPSIVGRPR	30	11	5	55.62	2	599.858
	CTRL-Rep-1	471.09	42009	45	9	18.04		EITALAPSTMK	317	11	5	75.05	2	581.314
	CTRL-Rep-1	471.09	42009	45	9	18.04		DSYVGDEAQSK	52	11	6	41.81	2	599.764
	CTRL-Rep-1	471.09	42009	45	9	18.04		IIAPPER	330	7	4	44.56	2	398.238
	CTRL-Rep-1	471.09	42009	45	9	18.04		DSYVGDEAQSKR	52	12	10	67.44	2	677.817
	CTRL-Rep-1	471.09	42009	45	9	18.04		SYELPDGQVITIGNER	240	16	6	53.35	2	895.955
	CTRL-Rep-1	471.09	42009	45	9	18.04		IIAPPERK	330	8	3	44.85	2	462.283
	CTRL-Rep-1	471.09	42009	45	9	18.04		EITALAPSTMK	317	11	0	1.75	2	572.302
	CTRL-Rep-3	487.49	42009	52	9	25.73		AGFAGDDAPR	20	10	9	110.55	2	488.724
	CTRL-Rep-3	487.49	42009	52	9	25.73		DSYVGDEAQSK	52	11	9	61.78	2	599.763
	CTRL-Rep-3	487.49	42009	52	9	25.73		AVFPSIVGRPR	30	11	5	55.06	2	599.855
	CTRL-Rep-3	487.49	42009	52	9	25.73		EITALAPSTMK	317	11	10	77.08	2	581.312
	CTRL-Rep-3	487.49	42009	52	9	25.73		DSYVGDEAQSKR	52	12	7	69.6	2	677.814
	CTRL-Rep-3	487.49	42009	52	9	25.73		IIAPPERK	330	8	3	44.42	2	462.283
	CTRL-Rep-3	487.49	42009	52	9	25.73		SYELPDGQVITIGNER	240	16	8	28.28	2	895.951
	CTRL-Rep-3	487.49	42009	52	9	25.73		DLTDYLMK	185	8	6	58.92	2	499.75
	CTRL-Rep-3	487.49	42009	52	9	25.73		DLYANNVLSGGTTMYPGIADR	293	21	3	24.55	3	743.358
	CTRL-Rep-4	463.28	42009	51	9	24.4		AGFAGDDAPR	20	10	8	102.66	2	488.727
	CTRL-Rep-4	463.28	42009	51	9	24.4		AVFPSIVGRPR	30	11	6	54.86	2	599.856
	CTRL-Rep-4	463.28	42009	51	9	24.4		EITALAPSTMK	317	11	12	95.98	2	581.312
	CTRL-Rep-4	463.28	42009	51	9	24.4		DSYVGDEAQSKR	52	12	7	66.27	2	677.815
	CTRL-Rep-4	463.28	42009	51	9	24.4		IIAPPERK	330	8	5	44.26	2	462.285
	CTRL-Rep-4	463.28	42009	51	9	24.4		SYELPDGQVITIGNER	240	16	4	19.77	2	895.949
	CTRL-Rep-4	463.28	42009	51	9	24.4		DLTDYLMK	185	8	5	39.49	2	499.747
	CTRL-Rep-4	463.28	42009	51	9	24.4		YPIEHGIITNWDDMEK	70	16	3	19.77	3	654.304
	CTRL-Rep-4	463.28	42009	51	9	24.4	Oxidation+M()	HQGVMVGMGQK	41	11	5	58.05	2	594.281
	POAG-Rep-1	362.77	42009	37	6	17.51		AGFAGDDAPR	20	10	11	112.36	2	488.727
	POAG-Rep-1	362.77	42009	37	6	17.51		AVFPSIVGRPR	30	11	6	55.91	2	599.856
	POAG-Rep-1	362.77	42009	37	6	17.51		EITALAPSTMK	317	11	6	55.91	2	581.314
	POAG-Rep-1	362.77	42009	37	6	17.51		DSYVGDEAQSK	52	11	5	46.88	2	599.765
	POAG-Rep-1	362.77	42009	37	6	17.51		SYELPDGQVITIGNER	240	16	7	47.61	2	895.952
	POAG-Rep-1	362.77	42009	37	6	17.51		IIAPPER	330	7	4	44.79	2	398.238
	POAG-Rep-2	524.45	42009	61	11	27.32		AGFAGDDAPR	20	10	11	111.59	2	488.728
	POAG-Rep-2	524.45	42009	61	11	27.32		AVFPSIVGRPR	30	11	6	34.89	2	599.856
	POAG-Rep-2	524.45	42009	61	11	27.32		YPIEHGIITNWDDMEK	70	16	5	44.3	3	654.304
	POAG-Rep-2	524.45	42009	61	11	27.32		DSYVGDEAQSK	52	11	5	30.91	2	599.765
	POAG-Rep-2	524.45	42009	61	11	27.32		EITALAPSTMK	317	11	11	77.83	2	581.312
	POAG-Rep-2	524.45	42009	61	11	27.32		IWHHSFYNELR	86	11	4	27.9	3	501.245
	POAG-Rep-2	524.45	42009	61	11	27.32		SYELPDGQVITIGNER	240	16	6	47.18	2	895.952
	POAG-Rep-2	524.45	42009	61	11	27.32		IIAPPER	330	7	3	44.5	2	398.238
	POAG-Rep-2	524.45	42009	61	11	27.32		IIAPPERK	330	8	3	44.8	2	462.286
	POAG-Rep-2	524.45	42009	61	11	27.32		DSYVGDEAQSKR	52	12	11	67.33	2	677.818
	POAG-Rep-2	524.45	42009	61	11	27.32		DLTDYLMK	185	8	6	54.66	2	499.749
	POAG-Rep-4	399.4	42009	43	7	20.95		AGFAGDDAPR	20	10	11	111.32	2	488.726
	POAG-Rep-4	399.4	42009	43	7	20.95		AVFPSIVGRPR	30	11	5	34.79	2	599.858
	POAG-Rep-4	399.4	42009	43	7	20.95		EITALAPSTMK	317	11	8	74.63	2	581.311
	POAG-Rep-4	399.4	42009	43	7	20.95		SYELPDGQVITIGNER	240	16	9	62.42	2	895.95
	POAG-Rep-4	399.4	42009	43	7	20.95		IIAPPERK	330	8	6	44.7	2	462.282
	POAG-Rep-4	399.4	42009	43	7	20.95		DSYVGDEAQSKR	52	12	4	36.96	2	677.817
	POAG-Rep-4	399.4	42009	43	7	20.95		HQGVMVGMGQK	41	11	4	30.81	2	586.293
sp|Q562R1|ACTBL_HUMAN Beta-actin-like protein 2 OS=Homo sapiens GN=ACTBL2 PE=1 SV=2	CTRL-Rep-1	242.53	42003	42	12	26.6	Carbamidomethyl+C(1)	CDVDIRK	285	7	7	56.21	2	453.227
	CTRL-Rep-1	242.53	42003	42	12	26.6		IIAPPER	329	7	4	44.56	2	398.238
	CTRL-Rep-1	242.53	42003	42	12	26.6		SYELPDGQVITIGNER	239	16	6	53.35	2	895.955
	CTRL-Rep-1	242.53	42003	42	12	26.6		IIAPPERK	329	8	3	44.85	2	462.283
	CTRL-Rep-1	242.53	42003	42	12	26.6	Carbamidomethyl+C(1)	CDVDIR	285	6	2	32.62	2	389.178
	CTRL-Rep-1	242.53	42003	42	12	26.6		GVLTLK	63	6	2	29.61	1	630.415
	CTRL-Rep-1	242.53	42003	42	12	26.6	Carbamidomethyl+C(18)	MTDNELSALVVDNGSGMCK	0	19	6	27.84	3	680.965
	CTRL-Rep-1	242.53	42003	42	12	26.6		AAASSSPER	230	9	3	34.35	2	438.214
	CTRL-Rep-1	242.53	42003	42	12	26.6	Carbamidomethyl+C(2)	LCYVALDFEQEMVR	216	14	3	28.03	3	591.608
	CTRL-Rep-1	242.53	42003	42	12	26.6		AGFGGDDAPRAVFPSMIGRPR	19	21	4	23.04	3	725.369
	CTRL-Rep-1	242.53	42003	42	12	26.6	Phosphoryl STY(7)	GYNFTTTAEREIVR	197	14	4	28.03	2	868.891
	CTRL-Rep-1	242.53	42003	42	12	26.6	Carbamidomethyl+C(1);Oxidation+M(27)	CPEAIFQPSFLGIESSGIHETTFNSIMK	257	28	4	13.44	4	789.89
	CTRL-Rep-3	250.07	42003	33	8	21.28	Carbamidomethyl+C(1)	CDVDIRK	285	7	6	55.61	2	453.23
	CTRL-Rep-3	250.07	42003	33	8	21.28		IIAPPERK	329	8	3	44.42	2	462.283
	CTRL-Rep-3	250.07	42003	33	8	21.28		SYELPDGQVITIGNER	239	16	8	28.28	2	895.951
	CTRL-Rep-3	250.07	42003	33	8	21.28		DLTDYLMK	184	8	6	58.92	2	499.75
	CTRL-Rep-3	250.07	42003	33	8	21.28		YPIEHGVVTNWDDMEK	69	16	4	19.89	3	644.971
	CTRL-Rep-3	250.07	42003	33	8	21.28	Carbamidomethyl+C(17)	TDNELSALVVDNGSGMCK	1	18	4	25.56	3	637.297
	CTRL-Rep-3	250.07	42003	33	8	21.28		GVLTLK	63	6	3	43.81	1	630.414
	CTRL-Rep-3	250.07	42003	33	8	21.28	Carbamidomethyl+C(18)	MTDNELSALVVDNGSGMCK	0	19	3	17.37	3	680.963
	POAG-Rep-2	289.1	42003	36	10	24.2	Carbamidomethyl+C(1)	CDVDIRK	285	7	5	56.13	2	453.228
	POAG-Rep-2	289.1	42003	36	10	24.2		SYELPDGQVITIGNER	239	16	6	47.18	2	895.952
	POAG-Rep-2	289.1	42003	36	10	24.2		IIAPPER	329	7	3	44.5	2	398.238
	POAG-Rep-2	289.1	42003	36	10	24.2		IIAPPERK	329	8	3	44.8	2	462.286
	POAG-Rep-2	289.1	42003	36	10	24.2		DLTDYLMK	184	8	6	54.66	2	499.749
	POAG-Rep-2	289.1	42003	36	10	24.2		YPIEHGVVTNWDDMEK	69	16	4	35.25	3	644.971
	POAG-Rep-2	289.1	42003	36	10	24.2	Carbamidomethyl+C(1)	CDVDIR	285	6	1	14.93	2	389.178
	POAG-Rep-2	289.1	42003	36	10	24.2		HQGVMVGMGQK	40	11	6	58.93	2	586.297
	POAG-Rep-2	289.1	42003	36	10	24.2		GVLTLK	63	6	1	14.93	1	630.419
	POAG-Rep-2	289.1	42003	36	10	24.2	Carbamidomethyl+C(18)	MTDNELSALVVDNGSGMCK	0	19	3	24.6	3	680.973
	POAG-Rep-4	219.15	42003	29	8	24.2		SYELPDGQVITIGNER	239	16	9	62.42	2	895.95
	POAG-Rep-4	219.15	42003	29	8	24.2		IIAPPERK	329	8	6	44.7	2	462.282
	POAG-Rep-4	219.15	42003	29	8	24.2		HQGVMVGMGQK	40	11	4	30.81	2	586.293
	POAG-Rep-4	219.15	42003	29	8	24.2	Carbamidomethyl+C(18)	MTDNELSALVVDNGSGMCK	0	19	5	17.57	3	680.966
	POAG-Rep-4	219.15	42003	29	8	24.2		GVLTLK	63	6	2	29.5	1	630.413
	POAG-Rep-4	219.15	42003	29	8	24.2		ILTER	192	5	1	14.6	1	631.371
	POAG-Rep-4	219.15	42003	29	8	24.2		GYNFTTTAER	197	10	4	32.28	3	387.19
	POAG-Rep-4	219.15	42003	29	8	24.2	Carbamidomethyl+C(4)	EKLCYVALDFEQEMVR	214	16	3	37.52	3	677.328
sp|Q9BYX7|ACTBM_HUMAN Putative beta-actin-like protein 3 OS=Homo sapiens GN=POTEKP PE=5 SV=1	CTRL-Rep-1	250.75	42016	25	4	13.6		QEYDESGPSIVHR	359	13	12	101.94	3	506.235
	CTRL-Rep-1	250.75	42016	25	4	13.6		IWHHTFYNELR	84	11	7	72.04	3	505.916
	CTRL-Rep-1	250.75	42016	25	4	13.6		SYELPDGQVITIGNER	238	16	6	53.35	2	895.955
	CTRL-Rep-1	250.75	42016	25	4	13.6		HQGMMEGMHQK	39	11	3	39.71	3	438.518
	CTRL-Rep-3	256.66	42016	33	6	15.73		IWHHTFYNELR	84	11	7	53.54	3	505.916
	CTRL-Rep-3	256.66	42016	33	6	15.73		QEYDESGPSIVHR	359	13	15	132.96	3	506.233
	CTRL-Rep-3	256.66	42016	33	6	15.73		SYELPDGQVITIGNER	238	16	8	28.28	2	895.951
	CTRL-Rep-3	256.66	42016	33	6	15.73		HQGMMEGMHQK	39	11	3	27.55	3	438.516
	CTRL-Rep-3	256.66	42016	33	6	15.73		TTFNSIVK	276	8	5	44.42	2	455.253
	CTRL-Rep-3	256.66	42016	33	6	15.73	Carbamidomethyl+C(17);Oxidation+M(1)	MDDDTAVLVIDNGSGMCK	0	18	4	18.11	4	489.968
	CTRL-Rep-4	288.37	42016	31	5	13.6		IWHHTFYNELR	84	11	9	77.73	3	505.916
	CTRL-Rep-4	288.37	42016	31	5	13.6		QEYDESGPSIVHR	359	13	15	137.89	3	506.234
	CTRL-Rep-4	288.37	42016	31	5	13.6		SYELPDGQVITIGNER	238	16	4	19.77	2	895.949
	CTRL-Rep-4	288.37	42016	31	5	13.6		HQGMMEGMHQK	39	11	3	27.4	3	438.516
	CTRL-Rep-4	288.37	42016	31	5	13.6	Carbamidomethyl+C(17);Oxidation+M(16)	MDDDTAVLVIDNGSGMCK	0	18	3	17.99	4	489.97
	POAG-Rep-1	273.24	42016	25	3	10.67		IWHHTFYNELR	84	11	8	75.39	3	505.916
	POAG-Rep-1	273.24	42016	25	3	10.67		QEYDESGPSIVHR	359	13	13	134.95	3	506.233
	POAG-Rep-1	273.24	42016	25	3	10.67		SYELPDGQVITIGNER	238	16	7	47.61	2	895.952
	POAG-Rep-2	268.22	42016	26	4	12.27		IWHHTFYNELR	84	11	9	58.93	3	505.916
	POAG-Rep-2	268.22	42016	26	4	12.27		QEYDESGPSIVHR	359	13	14	125.07	3	506.235
	POAG-Rep-2	268.22	42016	26	4	12.27		SYELPDGQVITIGNER	238	16	6	47.18	2	895.952
	POAG-Rep-2	268.22	42016	26	4	12.27		SDVDIR	284	6	1	14.93	2	352.686
	POAG-Rep-4	223.54	42016	23	4	10.67		QEYDESGPSIVHR	359	13	11	101.58	3	506.233
	POAG-Rep-4	223.54	42016	23	4	10.67		SYELPDGQVITIGNER	238	16	9	62.42	2	895.95
	POAG-Rep-4	223.54	42016	23	4	10.67		HQGMMEGMHQK	39	11	4	27.8	2	657.286
	POAG-Rep-4	223.54	42016	23	4	10.67		YDESGPSIVHR	361	11	3	18.35	2	630.308
sp|P60709|ACTB_HUMAN Actin	CTRL-Rep-1	746.59	41736	91	16	39.2		VAPEEHPVLLTEAPLNPK	95	18	7	29.12	3	652.021
	CTRL-Rep-1	746.59	41736	91	16	39.2		AGFAGDDAPR	18	10	11	111.74	2	488.726
	CTRL-Rep-1	746.59	41736	91	16	39.2		QEYDESGPSIVHR	359	13	12	101.94	3	506.235
	CTRL-Rep-1	746.59	41736	91	16	39.2		TTGIVMDSGDGVTHTVPIYEGYALPHAILR	147	30	15	81.62	4	796.653
	CTRL-Rep-1	746.59	41736	91	16	39.2		IWHHTFYNELR	84	11	7	72.04	3	505.916
	CTRL-Rep-1	746.59	41736	91	16	39.2		AVFPSIVGRPR	28	11	5	55.62	2	599.858
	CTRL-Rep-1	746.59	41736	91	16	39.2		EITALAPSTMK	315	11	5	75.05	2	581.314
	CTRL-Rep-1	746.59	41736	91	16	39.2		DSYVGDEAQSK	50	11	6	41.81	2	599.764
	CTRL-Rep-1	746.59	41736	91	16	39.2	Carbamidomethyl+C(1)	CDVDIRK	284	7	7	56.21	2	453.227
	CTRL-Rep-1	746.59	41736	91	16	39.2		IIAPPER	328	7	4	44.56	2	398.238
	CTRL-Rep-1	746.59	41736	91	16	39.2		DSYVGDEAQSKR	50	12	10	67.44	2	677.817
	CTRL-Rep-1	746.59	41736	91	16	39.2		SYELPDGQVITIGNER	238	16	6	53.35	2	895.955
	CTRL-Rep-1	746.59	41736	91	16	39.2		IIAPPERK	328	8	3	44.85	2	462.283
	CTRL-Rep-1	746.59	41736	91	16	39.2		EITALAPSTM	315	10	2	21.07	2	517.263
	CTRL-Rep-1	746.59	41736	91	16	39.2		PSIVGRPR	31	8	0	1.75	2	441.268
	CTRL-Rep-1	746.59	41736	91	16	39.2		GDEAQSKR	54	8	1	8.25	2	445.72
	CTRL-Rep-3	869.35	41736	107	18	51.47		AGFAGDDAPR	18	10	9	110.55	2	488.724
	CTRL-Rep-3	869.35	41736	107	18	51.47		VAPEEHPVLLTEAPLNPK	95	18	8	42.09	3	652.023
	CTRL-Rep-3	869.35	41736	107	18	51.47		TTGIVMDSGDGVTHTVPIYEGYALPHAILR	147	30	17	97.88	4	796.655
	CTRL-Rep-3	869.35	41736	107	18	51.47		IWHHTFYNELR	84	11	7	53.54	3	505.916
	CTRL-Rep-3	869.35	41736	107	18	51.47		GYSFTTTAER	196	10	6	56.52	2	566.767
	CTRL-Rep-3	869.35	41736	107	18	51.47		QEYDESGPSIVHR	359	13	15	132.96	3	506.233
	CTRL-Rep-3	869.35	41736	107	18	51.47		DSYVGDEAQSK	50	11	9	61.78	2	599.763
	CTRL-Rep-3	869.35	41736	107	18	51.47		AVFPSIVGRPR	28	11	5	55.06	2	599.855
	CTRL-Rep-3	869.35	41736	107	18	51.47		EITALAPSTMK	315	11	10	77.08	2	581.312
	CTRL-Rep-3	869.35	41736	107	18	51.47	Carbamidomethyl+C(1)	CDVDIRK	284	7	6	55.61	2	453.23
	CTRL-Rep-3	869.35	41736	107	18	51.47		DSYVGDEAQSKR	50	12	7	69.6	2	677.814
	CTRL-Rep-3	869.35	41736	107	18	51.47		IIAPPERK	328	8	3	44.42	2	462.283
	CTRL-Rep-3	869.35	41736	107	18	51.47		SYELPDGQVITIGNER	238	16	8	28.28	2	895.951
	CTRL-Rep-3	869.35	41736	107	18	51.47		DLTDYLMK	183	8	6	58.92	2	499.75
	CTRL-Rep-3	869.35	41736	107	18	51.47	Carbamidomethyl+C(1)	CDVDIR	284	6	2	32.32	2	389.178
	CTRL-Rep-3	869.35	41736	107	18	51.47	Carbamidomethyl+C(1);Carbamidomethyl+C(16)	CPEALFQPSFLGMESCGIHETTFNSIMK	256	28	3	13.22	3	1077.83
	CTRL-Rep-3	869.35	41736	107	18	51.47		YDESGPSIVHR	361	11	0	2.42	3	420.538
	CTRL-Rep-3	869.35	41736	107	18	51.47		QEYDESGPSIVHR	359	13	0	2.42	2	750.341
	CTRL-Rep-4	772.61	41736	98	17	45.07		VAPEEHPVLLTEAPLNPK	95	18	7	25.38	3	652.023
	CTRL-Rep-4	772.61	41736	98	17	45.07		AGFAGDDAPR	18	10	8	102.66	2	488.727
	CTRL-Rep-4	772.61	41736	98	17	45.07		TTGIVMDSGDGVTHTVPIYEGYALPHAILR	147	30	14	62.62	4	796.657
	CTRL-Rep-4	772.61	41736	98	17	45.07		IWHHTFYNELR	84	11	9	77.73	3	505.916
	CTRL-Rep-4	772.61	41736	98	17	45.07		QEYDESGPSIVHR	359	13	15	137.89	3	506.234
	CTRL-Rep-4	772.61	41736	98	17	45.07		AVFPSIVGRPR	28	11	6	54.86	2	599.856
	CTRL-Rep-4	772.61	41736	98	17	45.07		GYSFTTTAER	196	10	4	37.09	2	566.767
	CTRL-Rep-4	772.61	41736	98	17	45.07	Carbamidomethyl+C(1)	CDVDIRK	284	7	5	40.94	2	453.226
	CTRL-Rep-4	772.61	41736	98	17	45.07		EITALAPSTMK	315	11	12	95.98	2	581.312
	CTRL-Rep-4	772.61	41736	98	17	45.07		DSYVGDEAQSKR	50	12	7	66.27	2	677.815
	CTRL-Rep-4	772.61	41736	98	17	45.07		IIAPPERK	328	8	5	44.26	2	462.285
	CTRL-Rep-4	772.61	41736	98	17	45.07		SYELPDGQVITIGNER	238	16	4	19.77	2	895.949
	CTRL-Rep-4	772.61	41736	98	17	45.07		GYSFTTTAEREIVR	196	14	5	37.04	2	815.406
	CTRL-Rep-4	772.61	41736	98	17	45.07		DLTDYLMK	183	8	5	39.49	2	499.747
	CTRL-Rep-4	772.61	41736	98	17	45.07		EITALAPSTM	315	10	0	1.84	2	517.263
	CTRL-Rep-4	772.61	41736	98	17	45.07		VGDEAQSKR	53	9	1	8.14	2	495.252
	CTRL-Rep-4	772.61	41736	98	17	45.07		QEYDESGPSIVHR	359	13	0	2.45	3	500.231
	POAG-Rep-1	744.49	41736	109	18	52.8		VAPEEHPVLLTEAPLNPK	95	18	10	60.02	3	652.021
	POAG-Rep-1	744.49	41736	109	18	52.8		AGFAGDDAPR	18	10	11	112.36	2	488.727
	POAG-Rep-1	744.49	41736	109	18	52.8		TTGIVMDSGDGVTHTVPIYEGYALPHAILR	147	30	15	82.38	4	796.655
	POAG-Rep-1	744.49	41736	109	18	52.8		IWHHTFYNELR	84	11	8	75.39	3	505.916
	POAG-Rep-1	744.49	41736	109	18	52.8		QEYDESGPSIVHR	359	13	13	134.95	3	506.233
	POAG-Rep-1	744.49	41736	109	18	52.8		GYSFTTTAER	196	10	6	45.62	2	566.769
	POAG-Rep-1	744.49	41736	109	18	52.8		AVFPSIVGRPR	28	11	6	55.91	2	599.856
	POAG-Rep-1	744.49	41736	109	18	52.8		EITALAPSTMK	315	11	6	55.91	2	581.314
	POAG-Rep-1	744.49	41736	109	18	52.8		DSYVGDEAQSK	50	11	5	46.88	2	599.765
	POAG-Rep-1	744.49	41736	109	18	52.8	Carbamidomethyl+C(1)	CDVDIRK	284	7	6	44.79	2	453.229
	POAG-Rep-1	744.49	41736	109	18	52.8		SYELPDGQVITIGNER	238	16	7	47.61	2	895.952
	POAG-Rep-1	744.49	41736	109	18	52.8		IIAPPER	328	7	4	44.79	2	398.238
	POAG-Rep-1	744.49	41736	109	18	52.8	Carbamidomethyl+C(1)	CDVDIR	284	6	2	32.78	2	389.179
	POAG-Rep-1	744.49	41736	109	18	52.8		GILTLK	62	6	1	15.03	1	644.435
	POAG-Rep-1	744.49	41736	109	18	52.8	Carbamidomethyl+C(17)	MDDDIAALVVDNGSGMCK	0	18	5	31.13	3	637.623
	POAG-Rep-1	744.49	41736	109	18	52.8		DLTDYLMK	183	8	5	55.05	2	499.749
	POAG-Rep-1	744.49	41736	109	18	52.8		HQGVMVGMGQK	39	11	4	40.68	2	586.283
	POAG-Rep-1	744.49	41736	109	18	52.8	Phosphoryl STY()	YPIEHGIVTNWDDMEK	68	16	4	29.05	3	676.294
	POAG-Rep-2	844.18	41736	108	20	45.6		VAPEEHPVLLTEAPLNPK	95	18	9	59.5	3	652.021
	POAG-Rep-2	844.18	41736	108	20	45.6		AGFAGDDAPR	18	10	11	111.59	2	488.728
	POAG-Rep-2	844.18	41736	108	20	45.6		IWHHTFYNELR	84	11	9	58.93	3	505.916
	POAG-Rep-2	844.18	41736	108	20	45.6		TTGIVMDSGDGVTHTVPIYEGYALPHAILR	147	30	14	79.6	4	796.654
	POAG-Rep-2	844.18	41736	108	20	45.6		QEYDESGPSIVHR	359	13	14	125.07	3	506.235
	POAG-Rep-2	844.18	41736	108	20	45.6		GYSFTTTAER	196	10	5	60.02	2	566.769
	POAG-Rep-2	844.18	41736	108	20	45.6		AVFPSIVGRPR	28	11	6	34.89	2	599.856
	POAG-Rep-2	844.18	41736	108	20	45.6		DSYVGDEAQSK	50	11	5	30.91	2	599.765
	POAG-Rep-2	844.18	41736	108	20	45.6		EITALAPSTMK	315	11	11	77.83	2	581.312
	POAG-Rep-2	844.18	41736	108	20	45.6	Carbamidomethyl+C(1)	CDVDIRK	284	7	5	56.13	2	453.228
	POAG-Rep-2	844.18	41736	108	20	45.6		SYELPDGQVITIGNER	238	16	6	47.18	2	895.952
	POAG-Rep-2	844.18	41736	108	20	45.6		IIAPPER	328	7	3	44.5	2	398.238
	POAG-Rep-2	844.18	41736	108	20	45.6		IIAPPERK	328	8	3	44.8	2	462.286
	POAG-Rep-2	844.18	41736	108	20	45.6		DSYVGDEAQSKR	50	12	11	67.33	2	677.818
	POAG-Rep-2	844.18	41736	108	20	45.6		DLTDYLMK	183	8	6	54.66	2	499.749
	POAG-Rep-2	844.18	41736	108	20	45.6		GILTLK	62	6	1	14.93	1	644.433
	POAG-Rep-2	844.18	41736	108	20	45.6		EITALAPSTM	315	10	0	1.76	2	517.264
	POAG-Rep-2	844.18	41736	108	20	45.6		VGDEAQSKR	53	9	0	2.05	2	495.253
	POAG-Rep-2	844.18	41736	108	20	45.6		YVGDEAQSKR	52	10	2	23.55	2	576.79
	POAG-Rep-2	844.18	41736	108	20	45.6		EITALAPSTMK	315	11	0	1.76	2	572.307
	POAG-Rep-4	625.28	41736	82	17	41.6		VAPEEHPVLLTEAPLNPK	95	18	9	70.46	3	652.02
	POAG-Rep-4	625.28	41736	82	17	41.6		AGFAGDDAPR	18	10	11	111.32	2	488.726
	POAG-Rep-4	625.28	41736	82	17	41.6		QEYDESGPSIVHR	359	13	11	101.58	3	506.233
	POAG-Rep-4	625.28	41736	82	17	41.6		TTGIVMDSGDGVTHTVPIYEGYALPHAILR	147	30	11	50.92	4	796.651
	POAG-Rep-4	625.28	41736	82	17	41.6		GYSFTTTAER	196	10	5	59.89	2	566.768
	POAG-Rep-4	625.28	41736	82	17	41.6		AVFPSIVGRPR	28	11	5	34.79	2	599.858
	POAG-Rep-4	625.28	41736	82	17	41.6		EITALAPSTMK	315	11	8	74.63	2	581.311
	POAG-Rep-4	625.28	41736	82	17	41.6		SYELPDGQVITIGNER	238	16	9	62.42	2	895.95
	POAG-Rep-4	625.28	41736	82	17	41.6		IIAPPERK	328	8	6	44.7	2	462.282
	POAG-Rep-4	625.28	41736	82	17	41.6		DSYVGDEAQSKR	50	12	4	36.96	2	677.817
	POAG-Rep-4	625.28	41736	82	17	41.6		HQGVMVGMGQK	39	11	4	30.81	2	586.293
	POAG-Rep-4	625.28	41736	82	17	41.6		GILTLK	62	6	3	29.5	1	644.431
	POAG-Rep-4	625.28	41736	82	17	41.6		RGILTLK	61	7	4	44.4	2	400.767
	POAG-Rep-4	625.28	41736	82	17	41.6		EITALAPSTM	315	10	0	1.77	2	517.264
	POAG-Rep-4	625.28	41736	82	17	41.6		GDEAQSKR	54	8	0	2.07	2	445.721
	POAG-Rep-4	625.28	41736	82	17	41.6		VGDEAQSKR	53	9	0	2.07	2	495.25
	POAG-Rep-4	625.28	41736	82	17	41.6		QEYDESGPSIVHR	359	13	0	2.37	3	500.23
sp|P68032|ACTC_HUMAN Actin	CTRL-Rep-1	521.45	42019	51	9	20.95		AGFAGDDAPR	20	10	11	111.74	2	488.726
	CTRL-Rep-1	521.45	42019	51	9	20.95		IWHHTFYNELR	86	11	7	72.04	3	505.916
	CTRL-Rep-1	521.45	42019	51	9	20.95		AVFPSIVGRPR	30	11	5	55.62	2	599.858
	CTRL-Rep-1	521.45	42019	51	9	20.95		EITALAPSTMK	317	11	5	75.05	2	581.314
	CTRL-Rep-1	521.45	42019	51	9	20.95		DSYVGDEAQSK	52	11	6	41.81	2	599.764
	CTRL-Rep-1	521.45	42019	51	9	20.95		IIAPPER	330	7	4	44.56	2	398.238
	CTRL-Rep-1	521.45	42019	51	9	20.95		DSYVGDEAQSKR	52	12	10	67.44	2	677.817
	CTRL-Rep-1	521.45	42019	51	9	20.95		SYELPDGQVITIGNER	240	16	6	53.35	2	895.955
	CTRL-Rep-1	521.45	42019	51	9	20.95		IIAPPERK	330	8	3	44.85	2	462.283
	CTRL-Rep-3	515.47	42019	55	9	23.08		AGFAGDDAPR	20	10	9	110.55	2	488.724
	CTRL-Rep-3	515.47	42019	55	9	23.08		IWHHTFYNELR	86	11	7	53.54	3	505.916
	CTRL-Rep-3	515.47	42019	55	9	23.08		DSYVGDEAQSK	52	11	9	61.78	2	599.763
	CTRL-Rep-3	515.47	42019	55	9	23.08		AVFPSIVGRPR	30	11	5	55.06	2	599.855
	CTRL-Rep-3	515.47	42019	55	9	23.08		EITALAPSTMK	317	11	10	77.08	2	581.312
	CTRL-Rep-3	515.47	42019	55	9	23.08		DSYVGDEAQSKR	52	12	7	69.6	2	677.814
	CTRL-Rep-3	515.47	42019	55	9	23.08		IIAPPERK	330	8	3	44.42	2	462.283
	CTRL-Rep-3	515.47	42019	55	9	23.08		SYELPDGQVITIGNER	240	16	8	28.28	2	895.951
	CTRL-Rep-3	515.47	42019	55	9	23.08		DLTDYLMK	185	8	6	58.92	2	499.75
	CTRL-Rep-4	510.26	42019	51	8	23.08		AGFAGDDAPR	20	10	8	102.66	2	488.727
	CTRL-Rep-4	510.26	42019	51	8	23.08		IWHHTFYNELR	86	11	9	77.73	3	505.916
	CTRL-Rep-4	510.26	42019	51	8	23.08		AVFPSIVGRPR	30	11	6	54.86	2	599.856
	CTRL-Rep-4	510.26	42019	51	8	23.08		EITALAPSTMK	317	11	12	95.98	2	581.312
	CTRL-Rep-4	510.26	42019	51	8	23.08		DSYVGDEAQSKR	52	12	7	66.27	2	677.815
	CTRL-Rep-4	510.26	42019	51	8	23.08		IIAPPERK	330	8	5	44.26	2	462.285
	CTRL-Rep-4	510.26	42019	51	8	23.08		SYELPDGQVITIGNER	240	16	4	19.77	2	895.949
	CTRL-Rep-4	510.26	42019	51	8	23.08		DLTDYLMK	185	8	5	39.49	2	499.747
	POAG-Rep-1	421.44	42019	44	7	20.42		AGFAGDDAPR	20	10	11	112.36	2	488.727
	POAG-Rep-1	421.44	42019	44	7	20.42		IWHHTFYNELR	86	11	8	75.39	3	505.916
	POAG-Rep-1	421.44	42019	44	7	20.42		AVFPSIVGRPR	30	11	6	55.91	2	599.856
	POAG-Rep-1	421.44	42019	44	7	20.42		EITALAPSTMK	317	11	6	55.91	2	581.314
	POAG-Rep-1	421.44	42019	44	7	20.42		DSYVGDEAQSK	52	11	5	46.88	2	599.765
	POAG-Rep-1	421.44	42019	44	7	20.42		SYELPDGQVITIGNER	240	16	7	47.61	2	895.952
	POAG-Rep-1	421.44	42019	44	7	20.42		IIAPPER	330	7	4	44.79	2	398.238
	POAG-Rep-2	540.75	42019	65	11	27.32		AGFAGDDAPR	20	10	11	111.59	2	488.728
	POAG-Rep-2	540.75	42019	65	11	27.32		IWHHTFYNELR	86	11	9	58.93	3	505.916
	POAG-Rep-2	540.75	42019	65	11	27.32		AVFPSIVGRPR	30	11	6	34.89	2	599.856
	POAG-Rep-2	540.75	42019	65	11	27.32		YPIEHGIITNWDDMEK	70	16	5	44.3	3	654.304
	POAG-Rep-2	540.75	42019	65	11	27.32		DSYVGDEAQSK	52	11	5	30.91	2	599.765
	POAG-Rep-2	540.75	42019	65	11	27.32		EITALAPSTMK	317	11	11	77.83	2	581.312
	POAG-Rep-2	540.75	42019	65	11	27.32		SYELPDGQVITIGNER	240	16	6	47.18	2	895.952
	POAG-Rep-2	540.75	42019	65	11	27.32		IIAPPER	330	7	3	44.5	2	398.238
	POAG-Rep-2	540.75	42019	65	11	27.32		IIAPPERK	330	8	3	44.8	2	462.286
	POAG-Rep-2	540.75	42019	65	11	27.32		DSYVGDEAQSKR	52	12	11	67.33	2	677.818
	POAG-Rep-2	540.75	42019	65	11	27.32		DLTDYLMK	185	8	6	54.66	2	499.749
	POAG-Rep-4	390.01	42019	43	7	20.95		AGFAGDDAPR	20	10	11	111.32	2	488.726
	POAG-Rep-4	390.01	42019	43	7	20.95		AVFPSIVGRPR	30	11	5	34.79	2	599.858
	POAG-Rep-4	390.01	42019	43	7	20.95		EITALAPSTMK	317	11	8	74.63	2	581.311
	POAG-Rep-4	390.01	42019	43	7	20.95		SYELPDGQVITIGNER	240	16	9	62.42	2	895.95
	POAG-Rep-4	390.01	42019	43	7	20.95		IIAPPERK	330	8	6	44.7	2	462.282
	POAG-Rep-4	390.01	42019	43	7	20.95		DSYVGDEAQSKR	52	12	4	36.96	2	677.817
	POAG-Rep-4	390.01	42019	43	7	20.95		HQGVMVGMGQK	41	11	4	30.81	2	586.293
sp|P63261|ACTG_HUMAN Actin	CTRL-Rep-1	749.43	41792	102	21	54.67		VAPEEHPVLLTEAPLNPK	95	18	7	29.12	3	652.021
	CTRL-Rep-1	749.43	41792	102	21	54.67		AGFAGDDAPR	18	10	11	111.74	2	488.726
	CTRL-Rep-1	749.43	41792	102	21	54.67		QEYDESGPSIVHR	359	13	12	101.94	3	506.235
	CTRL-Rep-1	749.43	41792	102	21	54.67		TTGIVMDSGDGVTHTVPIYEGYALPHAILR	147	30	15	81.62	4	796.653
	CTRL-Rep-1	749.43	41792	102	21	54.67		IWHHTFYNELR	84	11	7	72.04	3	505.916
	CTRL-Rep-1	749.43	41792	102	21	54.67		AVFPSIVGRPR	28	11	5	55.62	2	599.858
	CTRL-Rep-1	749.43	41792	102	21	54.67		EITALAPSTMK	315	11	5	75.05	2	581.314
	CTRL-Rep-1	749.43	41792	102	21	54.67		DSYVGDEAQSK	50	11	6	41.81	2	599.764
	CTRL-Rep-1	749.43	41792	102	21	54.67	Carbamidomethyl+C(1)	CDVDIRK	284	7	7	56.21	2	453.227
	CTRL-Rep-1	749.43	41792	102	21	54.67		IIAPPER	328	7	4	44.56	2	398.238
	CTRL-Rep-1	749.43	41792	102	21	54.67		DSYVGDEAQSKR	50	12	10	67.44	2	677.817
	CTRL-Rep-1	749.43	41792	102	21	54.67		SYELPDGQVITIGNER	238	16	6	53.35	2	895.955
	CTRL-Rep-1	749.43	41792	102	21	54.67		IIAPPERK	328	8	3	44.85	2	462.283
	CTRL-Rep-1	749.43	41792	102	21	54.67		GYSFTTTAER	196	10	3	40.67	2	566.769
	CTRL-Rep-1	749.43	41792	102	21	54.67	Carbamidomethyl+C(3);Carbamidomethyl+C(18)	FRCPEALFQPSFLGMESCGIHETTFNSIMK	254	30	4	24.92	4	884.416
	CTRL-Rep-1	749.43	41792	102	21	54.67	Carbamidomethyl+C(17)	MEEEIAALVIDNGSGMCKAGFAGDDAPR	0	28	3	19.46	3	975.455
	CTRL-Rep-1	749.43	41792	102	21	54.67	Phosphoryl STY()	DLYANTVLSGGTTMYPGIADR	291	21	3	26.05	4	574.519
	CTRL-Rep-1	749.43	41792	102	21	54.67		FPSIVGRPR	30	9	0	1.75	2	514.804
	CTRL-Rep-1	749.43	41792	102	21	54.67		VGDEAQSKR	53	9	0	2.05	2	495.253
	CTRL-Rep-1	749.43	41792	102	21	54.67		VFPSIVGRPR	29	10	0	1.75	2	564.341
	CTRL-Rep-1	749.43	41792	102	21	54.67		YVGDEAQSKR	52	10	2	8.25	2	576.786
	CTRL-Rep-3	869.05	41792	104	15	45.6		AGFAGDDAPR	18	10	9	110.55	2	488.724
	CTRL-Rep-3	869.05	41792	104	15	45.6		VAPEEHPVLLTEAPLNPK	95	18	8	42.09	3	652.023
	CTRL-Rep-3	869.05	41792	104	15	45.6		TTGIVMDSGDGVTHTVPIYEGYALPHAILR	147	30	17	97.88	4	796.655
	CTRL-Rep-3	869.05	41792	104	15	45.6		IWHHTFYNELR	84	11	7	53.54	3	505.916
	CTRL-Rep-3	869.05	41792	104	15	45.6		GYSFTTTAER	196	10	6	56.52	2	566.767
	CTRL-Rep-3	869.05	41792	104	15	45.6		QEYDESGPSIVHR	359	13	15	132.96	3	506.233
	CTRL-Rep-3	869.05	41792	104	15	45.6		DSYVGDEAQSK	50	11	9	61.78	2	599.763
	CTRL-Rep-3	869.05	41792	104	15	45.6		AVFPSIVGRPR	28	11	5	55.06	2	599.855
	CTRL-Rep-3	869.05	41792	104	15	45.6		EITALAPSTMK	315	11	10	77.08	2	581.312
	CTRL-Rep-3	869.05	41792	104	15	45.6	Carbamidomethyl+C(1)	CDVDIRK	284	7	6	55.61	2	453.23
	CTRL-Rep-3	869.05	41792	104	15	45.6		DSYVGDEAQSKR	50	12	7	69.6	2	677.814
	CTRL-Rep-3	869.05	41792	104	15	45.6		IIAPPERK	328	8	3	44.42	2	462.283
	CTRL-Rep-3	869.05	41792	104	15	45.6		SYELPDGQVITIGNER	238	16	8	28.28	2	895.951
	CTRL-Rep-3	869.05	41792	104	15	45.6		DLTDYLMK	183	8	6	58.92	2	499.75
	CTRL-Rep-3	869.05	41792	104	15	45.6		GILTLK	62	6	2	29.31	1	644.43
	CTRL-Rep-4	769.43	41792	103	19	53.07		VAPEEHPVLLTEAPLNPK	95	18	7	25.38	3	652.023
	CTRL-Rep-4	769.43	41792	103	19	53.07		AGFAGDDAPR	18	10	8	102.66	2	488.727
	CTRL-Rep-4	769.43	41792	103	19	53.07		TTGIVMDSGDGVTHTVPIYEGYALPHAILR	147	30	14	62.62	4	796.657
	CTRL-Rep-4	769.43	41792	103	19	53.07		IWHHTFYNELR	84	11	9	77.73	3	505.916
	CTRL-Rep-4	769.43	41792	103	19	53.07		QEYDESGPSIVHR	359	13	15	137.89	3	506.234
	CTRL-Rep-4	769.43	41792	103	19	53.07		AVFPSIVGRPR	28	11	6	54.86	2	599.856
	CTRL-Rep-4	769.43	41792	103	19	53.07		GYSFTTTAER	196	10	4	37.09	2	566.767
	CTRL-Rep-4	769.43	41792	103	19	53.07	Carbamidomethyl+C(1)	CDVDIRK	284	7	5	40.94	2	453.226
	CTRL-Rep-4	769.43	41792	103	19	53.07		EITALAPSTMK	315	11	12	95.98	2	581.312
	CTRL-Rep-4	769.43	41792	103	19	53.07		DSYVGDEAQSKR	50	12	7	66.27	2	677.815
	CTRL-Rep-4	769.43	41792	103	19	53.07		IIAPPERK	328	8	5	44.26	2	462.285
	CTRL-Rep-4	769.43	41792	103	19	53.07		SYELPDGQVITIGNER	238	16	4	19.77	2	895.949
	CTRL-Rep-4	769.43	41792	103	19	53.07		GYSFTTTAEREIVR	196	14	5	37.04	2	815.406
	CTRL-Rep-4	769.43	41792	103	19	53.07		DLTDYLMK	183	8	5	39.49	2	499.747
	CTRL-Rep-4	769.43	41792	103	19	53.07	Carbamidomethyl+C(1);Carbamidomethyl+C(16)	CPEALFQPSFLGMESCGIHETTFNSIMK	256	28	3	13.14	3	1077.83
	CTRL-Rep-4	769.43	41792	103	19	53.07		SYELPDGQVITIGNERFR	238	18	4	26.91	3	698.693
	CTRL-Rep-4	769.43	41792	103	19	53.07		FPSIVGRPR	30	9	0	1.84	2	514.799
	CTRL-Rep-4	769.43	41792	103	19	53.07		PSIVGRPR	31	8	0	1.84	2	441.265
	CTRL-Rep-4	769.43	41792	103	19	53.07		YVGDEAQSKR	52	10	0	2.15	2	576.786
	POAG-Rep-1	747.21	41792	94	15	41.6		VAPEEHPVLLTEAPLNPK	95	18	10	60.02	3	652.021
	POAG-Rep-1	747.21	41792	94	15	41.6		AGFAGDDAPR	18	10	11	112.36	2	488.727
	POAG-Rep-1	747.21	41792	94	15	41.6		TTGIVMDSGDGVTHTVPIYEGYALPHAILR	147	30	15	82.38	4	796.655
	POAG-Rep-1	747.21	41792	94	15	41.6		IWHHTFYNELR	84	11	8	75.39	3	505.916
	POAG-Rep-1	747.21	41792	94	15	41.6		QEYDESGPSIVHR	359	13	13	134.95	3	506.233
	POAG-Rep-1	747.21	41792	94	15	41.6		GYSFTTTAER	196	10	6	45.62	2	566.769
	POAG-Rep-1	747.21	41792	94	15	41.6		AVFPSIVGRPR	28	11	6	55.91	2	599.856
	POAG-Rep-1	747.21	41792	94	15	41.6		EITALAPSTMK	315	11	6	55.91	2	581.314
	POAG-Rep-1	747.21	41792	94	15	41.6		DSYVGDEAQSK	50	11	5	46.88	2	599.765
	POAG-Rep-1	747.21	41792	94	15	41.6	Carbamidomethyl+C(1)	CDVDIRK	284	7	6	44.79	2	453.229
	POAG-Rep-1	747.21	41792	94	15	41.6		SYELPDGQVITIGNER	238	16	7	47.61	2	895.952
	POAG-Rep-1	747.21	41792	94	15	41.6		IIAPPER	328	7	4	44.79	2	398.238
	POAG-Rep-1	747.21	41792	94	15	41.6		IIAPPERK	328	8	4	55.05	2	462.284
	POAG-Rep-1	747.21	41792	94	15	41.6		YDESGPSIVHR	361	11	0	2.29	2	630.311
	POAG-Rep-1	747.21	41792	94	15	41.6		QEYDESGPSIVHR	359	13	0	2.29	3	500.231
	POAG-Rep-2	843.89	41792	109	21	44		VAPEEHPVLLTEAPLNPK	95	18	9	59.5	3	652.021
	POAG-Rep-2	843.89	41792	109	21	44		AGFAGDDAPR	18	10	11	111.59	2	488.728
	POAG-Rep-2	843.89	41792	109	21	44		IWHHTFYNELR	84	11	9	58.93	3	505.916
	POAG-Rep-2	843.89	41792	109	21	44		TTGIVMDSGDGVTHTVPIYEGYALPHAILR	147	30	14	79.6	4	796.654
	POAG-Rep-2	843.89	41792	109	21	44		QEYDESGPSIVHR	359	13	14	125.07	3	506.235
	POAG-Rep-2	843.89	41792	109	21	44		GYSFTTTAER	196	10	5	60.02	2	566.769
	POAG-Rep-2	843.89	41792	109	21	44		AVFPSIVGRPR	28	11	6	34.89	2	599.856
	POAG-Rep-2	843.89	41792	109	21	44		DSYVGDEAQSK	50	11	5	30.91	2	599.765
	POAG-Rep-2	843.89	41792	109	21	44		EITALAPSTMK	315	11	11	77.83	2	581.312
	POAG-Rep-2	843.89	41792	109	21	44	Carbamidomethyl+C(1)	CDVDIRK	284	7	5	56.13	2	453.228
	POAG-Rep-2	843.89	41792	109	21	44		SYELPDGQVITIGNER	238	16	6	47.18	2	895.952
	POAG-Rep-2	843.89	41792	109	21	44		IIAPPER	328	7	3	44.5	2	398.238
	POAG-Rep-2	843.89	41792	109	21	44		IIAPPERK	328	8	3	44.8	2	462.286
	POAG-Rep-2	843.89	41792	109	21	44		DSYVGDEAQSKR	50	12	11	67.33	2	677.818
	POAG-Rep-2	843.89	41792	109	21	44		DLTDYLMK	183	8	6	54.66	2	499.749
	POAG-Rep-2	843.89	41792	109	21	44	Carbamidomethyl+C(2);Oxidation+M()	LCYVALDFEQEMATAASSSSLEK	215	23	4	24.34	4	642.294
	POAG-Rep-2	843.89	41792	109	21	44		FPSIVGRPR	30	9	0	1.76	2	514.801
	POAG-Rep-2	843.89	41792	109	21	44		PSIVGRPR	31	8	0	1.76	2	441.265
	POAG-Rep-2	843.89	41792	109	21	44		GDEAQSKR	54	8	0	2.05	2	445.722
	POAG-Rep-2	843.89	41792	109	21	44		YDESGPSIVHR	361	11	1	7.96	2	630.312
	POAG-Rep-2	843.89	41792	109	21	44		GDEAQSK	54	7	0	1.76	1	734.336
	POAG-Rep-4	634.97	41792	88	17	46.93		VAPEEHPVLLTEAPLNPK	95	18	9	70.46	3	652.02
	POAG-Rep-4	634.97	41792	88	17	46.93		AGFAGDDAPR	18	10	11	111.32	2	488.726
	POAG-Rep-4	634.97	41792	88	17	46.93		QEYDESGPSIVHR	359	13	11	101.58	3	506.233
	POAG-Rep-4	634.97	41792	88	17	46.93		TTGIVMDSGDGVTHTVPIYEGYALPHAILR	147	30	11	50.92	4	796.651
	POAG-Rep-4	634.97	41792	88	17	46.93		GYSFTTTAER	196	10	5	59.89	2	566.768
	POAG-Rep-4	634.97	41792	88	17	46.93		AVFPSIVGRPR	28	11	5	34.79	2	599.858
	POAG-Rep-4	634.97	41792	88	17	46.93		EITALAPSTMK	315	11	8	74.63	2	581.311
	POAG-Rep-4	634.97	41792	88	17	46.93		SYELPDGQVITIGNER	238	16	9	62.42	2	895.95
	POAG-Rep-4	634.97	41792	88	17	46.93		IIAPPERK	328	8	6	44.7	2	462.282
	POAG-Rep-4	634.97	41792	88	17	46.93		DSYVGDEAQSKR	50	12	4	36.96	2	677.817
	POAG-Rep-4	634.97	41792	88	17	46.93		HQGVMVGMGQK	39	11	4	30.81	2	586.293
	POAG-Rep-4	634.97	41792	88	17	46.93	Carbamidomethyl+C(16)	EEEIAALVIDNGSGMCK	1	17	4	34.15	3	612.614
	POAG-Rep-4	634.97	41792	88	17	46.93		DLTDYLMK	183	8	3	39.93	2	499.74
	POAG-Rep-4	634.97	41792	88	17	46.93	Carbamidomethyl+C(17)	MEEEIAALVIDNGSGMCK	0	18	5	30.71	2	983.932
	POAG-Rep-4	634.97	41792	88	17	46.93		FPSIVGRPR	30	9	0	1.77	2	514.803
	POAG-Rep-4	634.97	41792	88	17	46.93		PSIVGRPR	31	8	0	1.77	2	441.268
	POAG-Rep-4	634.97	41792	88	17	46.93		VFPSIVGRPR	29	10	0	1.77	2	564.339
sp|P63267|ACTH_HUMAN Actin	CTRL-Rep-1	463.94	41877	45	8	18.09		AGFAGDDAPR	19	10	11	111.74	2	488.726
	CTRL-Rep-1	463.94	41877	45	8	18.09		AVFPSIVGRPR	29	11	5	55.62	2	599.858
	CTRL-Rep-1	463.94	41877	45	8	18.09		EITALAPSTMK	316	11	5	75.05	2	581.314
	CTRL-Rep-1	463.94	41877	45	8	18.09		DSYVGDEAQSK	51	11	6	41.81	2	599.764
	CTRL-Rep-1	463.94	41877	45	8	18.09		IIAPPER	329	7	4	44.56	2	398.238
	CTRL-Rep-1	463.94	41877	45	8	18.09		DSYVGDEAQSKR	51	12	10	67.44	2	677.817
	CTRL-Rep-1	463.94	41877	45	8	18.09		SYELPDGQVITIGNER	239	16	6	53.35	2	895.955
	CTRL-Rep-1	463.94	41877	45	8	18.09		IIAPPERK	329	8	3	44.85	2	462.283
	CTRL-Rep-3	475.5	41877	51	16	20.21		AGFAGDDAPR	19	10	9	110.55	2	488.724
	CTRL-Rep-3	475.5	41877	51	16	20.21		DSYVGDEAQSK	51	11	9	61.78	2	599.763
	CTRL-Rep-3	475.5	41877	51	16	20.21		AVFPSIVGRPR	29	11	5	55.06	2	599.855
	CTRL-Rep-3	475.5	41877	51	16	20.21		EITALAPSTMK	316	11	10	77.08	2	581.312
	CTRL-Rep-3	475.5	41877	51	16	20.21		DSYVGDEAQSKR	51	12	7	69.6	2	677.814
	CTRL-Rep-3	475.5	41877	51	16	20.21		IIAPPERK	329	8	3	44.42	2	462.283
	CTRL-Rep-3	475.5	41877	51	16	20.21		SYELPDGQVITIGNER	239	16	8	28.28	2	895.951
	CTRL-Rep-3	475.5	41877	51	16	20.21		DLTDYLMK	184	8	6	58.92	2	499.75
	CTRL-Rep-3	475.5	41877	51	16	20.21		FPSIVGRPR	31	9	0	1.82	2	514.802
	CTRL-Rep-3	475.5	41877	51	16	20.21		EITALAPSTM	316	10	0	1.82	2	517.264
	CTRL-Rep-3	475.5	41877	51	16	20.21		PSIVGRPR	32	8	0	1.82	2	441.265
	CTRL-Rep-3	475.5	41877	51	16	20.21		GDEAQSKR	55	8	0	2.12	2	445.716
	CTRL-Rep-3	475.5	41877	51	16	20.21		VGDEAQSKR	54	9	0	2.12	2	495.25
	CTRL-Rep-3	475.5	41877	51	16	20.21		YVGDEAQSKR	53	10	1	8.17	2	576.787
	CTRL-Rep-3	475.5	41877	51	16	20.21		VFPSIVGRPR	30	10	1	8.54	2	564.336
	CTRL-Rep-3	475.5	41877	51	16	20.21		EITALAPSTMK	316	11	0	1.82	2	572.299
	CTRL-Rep-4	456.17	41877	47	10	25		AGFAGDDAPR	19	10	8	102.66	2	488.727
	CTRL-Rep-4	456.17	41877	47	10	25		AVFPSIVGRPR	29	11	6	54.86	2	599.856
	CTRL-Rep-4	456.17	41877	47	10	25		EITALAPSTMK	316	11	12	95.98	2	581.312
	CTRL-Rep-4	456.17	41877	47	10	25		DSYVGDEAQSKR	51	12	7	66.27	2	677.815
	CTRL-Rep-4	456.17	41877	47	10	25		IIAPPERK	329	8	5	44.26	2	462.285
	CTRL-Rep-4	456.17	41877	47	10	25		SYELPDGQVITIGNER	239	16	4	19.77	2	895.949
	CTRL-Rep-4	456.17	41877	47	10	25		DLTDYLMK	184	8	5	39.49	2	499.747
	CTRL-Rep-4	456.17	41877	47	10	25		LDLAGR	178	6	1	14.75	2	322.687
	CTRL-Rep-4	456.17	41877	47	10	25		GILTLK	63	6	3	29.2	1	644.435
	CTRL-Rep-4	456.17	41877	47	10	25	Carbamidomethyl+C(1)	CDIDIR	285	6	1	14.75	2	396.187
	POAG-Rep-1	349.97	41877	40	11	17.55		AGFAGDDAPR	19	10	11	112.36	2	488.727
	POAG-Rep-1	349.97	41877	40	11	17.55		AVFPSIVGRPR	29	11	6	55.91	2	599.856
	POAG-Rep-1	349.97	41877	40	11	17.55		EITALAPSTMK	316	11	6	55.91	2	581.314
	POAG-Rep-1	349.97	41877	40	11	17.55		DSYVGDEAQSK	51	11	5	46.88	2	599.765
	POAG-Rep-1	349.97	41877	40	11	17.55		SYELPDGQVITIGNER	239	16	7	47.61	2	895.952
	POAG-Rep-1	349.97	41877	40	11	17.55		IIAPPER	329	7	4	44.79	2	398.238
	POAG-Rep-1	349.97	41877	40	11	17.55		FPSIVGRPR	31	9	1	8.68	2	514.802
	POAG-Rep-1	349.97	41877	40	11	17.55		PSIVGRPR	32	8	0	1.72	2	441.266
	POAG-Rep-1	349.97	41877	40	11	17.55		EITALAPSTM	316	10	1	8.68	2	517.264
	POAG-Rep-1	349.97	41877	40	11	17.55		VFPSIVGRPR	30	10	1	8.68	2	564.334
	POAG-Rep-1	349.97	41877	40	11	17.55		EITALAPSTMK	316	11	0	1.72	2	572.299
	POAG-Rep-2	514.85	41877	61	11	27.39		AGFAGDDAPR	19	10	11	111.59	2	488.728
	POAG-Rep-2	514.85	41877	61	11	27.39		AVFPSIVGRPR	29	11	6	34.89	2	599.856
	POAG-Rep-2	514.85	41877	61	11	27.39		YPIEHGIITNWDDMEK	69	16	5	44.3	3	654.304
	POAG-Rep-2	514.85	41877	61	11	27.39		DSYVGDEAQSK	51	11	5	30.91	2	599.765
	POAG-Rep-2	514.85	41877	61	11	27.39		EITALAPSTMK	316	11	11	77.83	2	581.312
	POAG-Rep-2	514.85	41877	61	11	27.39		IWHHSFYNELR	85	11	4	27.9	3	501.245
	POAG-Rep-2	514.85	41877	61	11	27.39		SYELPDGQVITIGNER	239	16	6	47.18	2	895.952
	POAG-Rep-2	514.85	41877	61	11	27.39		IIAPPER	329	7	3	44.5	2	398.238
	POAG-Rep-2	514.85	41877	61	11	27.39		IIAPPERK	329	8	3	44.8	2	462.286
	POAG-Rep-2	514.85	41877	61	11	27.39		DSYVGDEAQSKR	51	12	11	67.33	2	677.818
	POAG-Rep-2	514.85	41877	61	11	27.39		DLTDYLMK	184	8	6	54.66	2	499.749
	POAG-Rep-4	392.83	41877	43	7	21.01		AGFAGDDAPR	19	10	11	111.32	2	488.726
	POAG-Rep-4	392.83	41877	43	7	21.01		AVFPSIVGRPR	29	11	5	34.79	2	599.858
	POAG-Rep-4	392.83	41877	43	7	21.01		EITALAPSTMK	316	11	8	74.63	2	581.311
	POAG-Rep-4	392.83	41877	43	7	21.01		SYELPDGQVITIGNER	239	16	9	62.42	2	895.95
	POAG-Rep-4	392.83	41877	43	7	21.01		IIAPPERK	329	8	6	44.7	2	462.282
	POAG-Rep-4	392.83	41877	43	7	21.01		DSYVGDEAQSKR	51	12	4	36.96	2	677.817
	POAG-Rep-4	392.83	41877	43	7	21.01		HQGVMVGMGQK	40	11	4	30.81	2	586.293
sp|P68133|ACTS_HUMAN Actin	CTRL-Rep-1	516.74	42051	51	9	20.95		AGFAGDDAPR	20	10	11	111.74	2	488.726
	CTRL-Rep-1	516.74	42051	51	9	20.95		IWHHTFYNELR	86	11	7	72.04	3	505.916
	CTRL-Rep-1	516.74	42051	51	9	20.95		AVFPSIVGRPR	30	11	5	55.62	2	599.858
	CTRL-Rep-1	516.74	42051	51	9	20.95		EITALAPSTMK	317	11	5	75.05	2	581.314
	CTRL-Rep-1	516.74	42051	51	9	20.95		DSYVGDEAQSK	52	11	6	41.81	2	599.764
	CTRL-Rep-1	516.74	42051	51	9	20.95		IIAPPER	330	7	4	44.56	2	398.238
	CTRL-Rep-1	516.74	42051	51	9	20.95		DSYVGDEAQSKR	52	12	10	67.44	2	677.817
	CTRL-Rep-1	516.74	42051	51	9	20.95		SYELPDGQVITIGNER	240	16	6	53.35	2	895.955
	CTRL-Rep-1	516.74	42051	51	9	20.95		IIAPPERK	330	8	3	44.85	2	462.283
	CTRL-Rep-3	506.73	42051	55	9	23.08		AGFAGDDAPR	20	10	9	110.55	2	488.724
	CTRL-Rep-3	506.73	42051	55	9	23.08		IWHHTFYNELR	86	11	7	53.54	3	505.916
	CTRL-Rep-3	506.73	42051	55	9	23.08		DSYVGDEAQSK	52	11	9	61.78	2	599.763
	CTRL-Rep-3	506.73	42051	55	9	23.08		AVFPSIVGRPR	30	11	5	55.06	2	599.855
	CTRL-Rep-3	506.73	42051	55	9	23.08		EITALAPSTMK	317	11	10	77.08	2	581.312
	CTRL-Rep-3	506.73	42051	55	9	23.08		DSYVGDEAQSKR	52	12	7	69.6	2	677.814
	CTRL-Rep-3	506.73	42051	55	9	23.08		IIAPPERK	330	8	3	44.42	2	462.283
	CTRL-Rep-3	506.73	42051	55	9	23.08		SYELPDGQVITIGNER	240	16	8	28.28	2	895.951
	CTRL-Rep-3	506.73	42051	55	9	23.08		DLTDYLMK	185	8	6	58.92	2	499.75
	CTRL-Rep-4	500.38	42051	51	8	23.08		AGFAGDDAPR	20	10	8	102.66	2	488.727
	CTRL-Rep-4	500.38	42051	51	8	23.08		IWHHTFYNELR	86	11	9	77.73	3	505.916
	CTRL-Rep-4	500.38	42051	51	8	23.08		AVFPSIVGRPR	30	11	6	54.86	2	599.856
	CTRL-Rep-4	500.38	42051	51	8	23.08		EITALAPSTMK	317	11	12	95.98	2	581.312
	CTRL-Rep-4	500.38	42051	51	8	23.08		DSYVGDEAQSKR	52	12	7	66.27	2	677.815
	CTRL-Rep-4	500.38	42051	51	8	23.08		IIAPPERK	330	8	5	44.26	2	462.285
	CTRL-Rep-4	500.38	42051	51	8	23.08		SYELPDGQVITIGNER	240	16	4	19.77	2	895.949
	CTRL-Rep-4	500.38	42051	51	8	23.08		DLTDYLMK	185	8	5	39.49	2	499.747
	POAG-Rep-1	416.48	42051	44	7	20.42		AGFAGDDAPR	20	10	11	112.36	2	488.727
	POAG-Rep-1	416.48	42051	44	7	20.42		IWHHTFYNELR	86	11	8	75.39	3	505.916
	POAG-Rep-1	416.48	42051	44	7	20.42		AVFPSIVGRPR	30	11	6	55.91	2	599.856
	POAG-Rep-1	416.48	42051	44	7	20.42		EITALAPSTMK	317	11	6	55.91	2	581.314
	POAG-Rep-1	416.48	42051	44	7	20.42		DSYVGDEAQSK	52	11	5	46.88	2	599.765
	POAG-Rep-1	416.48	42051	44	7	20.42		SYELPDGQVITIGNER	240	16	7	47.61	2	895.952
	POAG-Rep-1	416.48	42051	44	7	20.42		IIAPPER	330	7	4	44.79	2	398.238
	POAG-Rep-2	541.05	42051	65	11	27.32		AGFAGDDAPR	20	10	11	111.59	2	488.728
	POAG-Rep-2	541.05	42051	65	11	27.32		IWHHTFYNELR	86	11	9	58.93	3	505.916
	POAG-Rep-2	541.05	42051	65	11	27.32		AVFPSIVGRPR	30	11	6	34.89	2	599.856
	POAG-Rep-2	541.05	42051	65	11	27.32		YPIEHGIITNWDDMEK	70	16	5	44.3	3	654.304
	POAG-Rep-2	541.05	42051	65	11	27.32		DSYVGDEAQSK	52	11	5	30.91	2	599.765
	POAG-Rep-2	541.05	42051	65	11	27.32		EITALAPSTMK	317	11	11	77.83	2	581.312
	POAG-Rep-2	541.05	42051	65	11	27.32		SYELPDGQVITIGNER	240	16	6	47.18	2	895.952
	POAG-Rep-2	541.05	42051	65	11	27.32		IIAPPER	330	7	3	44.5	2	398.238
	POAG-Rep-2	541.05	42051	65	11	27.32		IIAPPERK	330	8	3	44.8	2	462.286
	POAG-Rep-2	541.05	42051	65	11	27.32		DSYVGDEAQSKR	52	12	11	67.33	2	677.818
	POAG-Rep-2	541.05	42051	65	11	27.32		DLTDYLMK	185	8	6	54.66	2	499.749
	POAG-Rep-4	390.01	42051	43	7	20.95		AGFAGDDAPR	20	10	11	111.32	2	488.726
	POAG-Rep-4	390.01	42051	43	7	20.95		AVFPSIVGRPR	30	11	5	34.79	2	599.858
	POAG-Rep-4	390.01	42051	43	7	20.95		EITALAPSTMK	317	11	8	74.63	2	581.311
	POAG-Rep-4	390.01	42051	43	7	20.95		SYELPDGQVITIGNER	240	16	9	62.42	2	895.95
	POAG-Rep-4	390.01	42051	43	7	20.95		IIAPPERK	330	8	6	44.7	2	462.282
	POAG-Rep-4	390.01	42051	43	7	20.95		DSYVGDEAQSKR	52	12	4	36.96	2	677.817
	POAG-Rep-4	390.01	42051	43	7	20.95		HQGVMVGMGQK	41	11	4	30.81	2	586.293
sp|P00352|AL1A1_HUMAN Retinal dehydrogenase 1 OS=Homo sapiens GN=ALDH1A1 PE=1 SV=2	CTRL-Rep-3	224.44	54861	39	11	29.34	Carbamidomethyl+C(7)	IGPALSCGNTVVVKPAEQTPLTALHVASLIK	179	31	9	24.31	4	796.946
	CTRL-Rep-3	224.44	54861	39	11	29.34		VAFTGSTEVGK	241	11	5	30.56	2	548.286
	CTRL-Rep-3	224.44	54861	39	11	29.34		LLLATMESMNGGK	100	13	6	48.71	3	455.572
	CTRL-Rep-3	224.44	54861	39	11	29.34		ELGEYGFHEYTEVK	476	14	3	30.79	2	850.89
	CTRL-Rep-3	224.44	54861	39	11	29.34		ANNTFYGLSAGVFTK	420	15	4	29.06	3	530.602
	CTRL-Rep-3	224.44	54861	39	11	29.34		LADLIER	91	7	4	44.12	2	415.239
	CTRL-Rep-3	224.44	54861	39	11	29.34		TIPIDGNFFTYTR	143	13	3	38.15	2	772.885
	CTRL-Rep-3	224.44	54861	39	11	29.34		QAFQIGSPWR	68	10	3	37.24	2	595.309
	CTRL-Rep-3	224.44	54861	39	11	29.34		SNLK	260	4	1	14.2	1	461.272
	CTRL-Rep-3	224.44	54861	39	11	29.34		IFINNEWHDSVSGK	22	14	4	30.79	3	549.271
	CTRL-Rep-3	224.44	54861	39	11	29.34	Carbamidomethyl+C(13)	LYSNAYLNDLAGCIK	113	15	3	20.97	2	857.941
sp|P02768|ALBU_HUMAN Serum albumin OS=Homo sapiens GN=ALB PE=1 SV=2	CTRL-Rep-1	3504.24	69366	550	78	74.38		FQNALLVR	426	8	16	100.48	2	480.783
	CTRL-Rep-1	3504.24	69366	550	78	74.38		LVNEVTEFAK	65	10	22	140.27	2	575.311
	CTRL-Rep-1	3504.24	69366	550	78	74.38		VFDEFKPLVEEPQNLIK	396	17	32	329.86	3	682.363
	CTRL-Rep-1	3504.24	69366	550	78	74.38		QTALVELVK	549	9	17	89.12	2	500.804
	CTRL-Rep-1	3504.24	69366	550	78	74.38	Carbamidomethyl+C(4);Carbamidomethyl+C(5)	LKECCEKPLLEK	298	12	17	152.5	3	516.268
	CTRL-Rep-1	3504.24	69366	550	78	74.38		TYETTLEK	375	8	15	103.49	2	492.747
	CTRL-Rep-1	3504.24	69366	550	78	74.38	Carbamidomethyl+C(1);Carbamidomethyl+C(2)	CCTESLVNR	499	9	18	113.67	2	569.752
	CTRL-Rep-1	3504.24	69366	550	78	74.38		AEFAEVSK	249	8	15	103.49	2	440.721
	CTRL-Rep-1	3504.24	69366	550	78	74.38	Carbamidomethyl+C(6);Carbamidomethyl+C(7)	AAFTECCQAADK	186	12	22	170.17	2	686.287
	CTRL-Rep-1	3504.24	69366	550	78	74.38		LDELRDEGK	205	9	22	147.76	2	537.772
	CTRL-Rep-1	3504.24	69366	550	78	74.38	Carbamidomethyl+C(2)	LCTVATLR	97	8	11	84.06	2	467.265
	CTRL-Rep-1	3504.24	69366	550	78	74.38		AVMDDFAAFVEK	569	12	15	150.28	2	671.818
	CTRL-Rep-1	3504.24	69366	550	78	74.38	Carbamidomethyl+C(3)	QNCELFEQLGEYK	413	13	32	217.45	2	829.379
	CTRL-Rep-1	3504.24	69366	550	78	74.38	Carbamidomethyl+C(3)	NECFLQHKDDNPNLPR	122	16	25	166.11	4	499.983
	CTRL-Rep-1	3504.24	69366	550	78	74.38	Carbamidomethyl+C(14)	ALVLIAFAQYLQQCPFEDHVK	44	21	34	305.96	3	830.762
	CTRL-Rep-1	3504.24	69366	550	78	74.38	Carbamidomethyl+C(3)	YICENQDSISSK	286	12	25	181.82	2	722.322
	CTRL-Rep-1	3504.24	69366	550	78	74.38	Carbamidomethyl+C(2);Carbamidomethyl+C(11)	TCVADESAENCDK	75	13	39	233.87	2	749.79
	CTRL-Rep-1	3504.24	69366	550	78	74.38		SLHTLFGDK	88	9	9	66.68	2	509.269
	CTRL-Rep-1	3504.24	69366	550	78	74.38	Carbamidomethyl+C(9);Carbamidomethyl+C(10)	ETYGEMADCCAK	105	12	11	125.52	2	717.769
	CTRL-Rep-1	3504.24	69366	550	78	74.38		DLGEENFK	36	8	5	44.85	2	476.221
	CTRL-Rep-1	3504.24	69366	550	78	74.38		DDNPNLPR	130	8	6	44.85	2	470.727
	CTRL-Rep-1	3504.24	69366	550	78	74.38	Carbamidomethyl+C(3)	SHCIAEVENDEMPADLPSLAADFVESK	310	27	17	101	3	992.119
	CTRL-Rep-1	3504.24	69366	550	78	74.38	Carbamidomethyl+C(5);Carbamidomethyl+C(6);Carbamidomethyl+C(13)	VHTECCHGDLLECADDR	264	17	12	94.13	3	696.283
	CTRL-Rep-1	3504.24	69366	550	78	74.38	Carbamidomethyl+C(10)	LVRPEVDVMCTAFHDNEETFLK	138	22	10	64.85	4	663.314
	CTRL-Rep-1	3504.24	69366	550	78	74.38		LVAASQAALGL	598	11	9	81.92	2	507.301
	CTRL-Rep-1	3504.24	69366	550	78	74.38	Carbamidomethyl+C(3);Carbamidomethyl+C(16)	MPCAEDYLSVVLNQLCVLHEK	469	21	11	41.4	3	840.076
	CTRL-Rep-1	3504.24	69366	550	78	74.38	Carbamidomethyl+C(14)	EFNAETFTFHADICTLSEKER	524	21	9	59.66	4	637.041
	CTRL-Rep-1	3504.24	69366	550	78	74.38	Carbamidomethyl+C(7)	ADDKETCFAEEGK	584	13	14	118.03	3	500.543
	CTRL-Rep-1	3504.24	69366	550	78	74.38		VPQVSTPTLVEVSR	438	14	10	100.08	2	756.428
	CTRL-Rep-1	3504.24	69366	550	78	74.38	Carbamidomethyl+C(14)	EFNAETFTFHADICTLSEK	524	19	10	80.66	3	754.011
	CTRL-Rep-1	3504.24	69366	550	78	74.38	Carbamidomethyl+C(3)	NECFLQHK	122	8	5	44.85	2	538.253
	CTRL-Rep-1	3504.24	69366	550	78	74.38	Carbamidomethyl+C(1);Carbamidomethyl+C(2);Carbamidomethyl+C(10)	CCAAADPHECYAK	383	13	19	229.09	3	518.197
	CTRL-Rep-1	3504.24	69366	550	78	74.38	Carbamidomethyl+C(3)	RPCFSALEVDETYVPK	508	16	23	242.41	3	637.64
	CTRL-Rep-1	3504.24	69366	550	78	74.38		HPYFYAPELLFFAK	169	14	8	84.91	3	581.629
	CTRL-Rep-1	3504.24	69366	550	78	74.38		AWAVAR	236	6	3	47.28	1	673.372
	CTRL-Rep-1	3504.24	69366	550	78	74.38		LVTDLTK	257	7	6	70.87	2	395.235
	CTRL-Rep-1	3504.24	69366	550	78	74.38		YLYEIAR	161	7	4	59.22	2	464.248
	CTRL-Rep-1	3504.24	69366	550	78	74.38		LDELR	205	5	1	14.66	1	645.36
	CTRL-Rep-1	3504.24	69366	550	78	74.38		KVPQVSTPTLVEVSR	437	15	16	158.33	2	820.473
	CTRL-Rep-1	3504.24	69366	550	78	74.38	Carbamidomethyl+C(11)	SLHTLFGDKLCTVATLR	88	17	17	147.16	3	644.678
	CTRL-Rep-1	3504.24	69366	550	78	74.38		KQTALVELVK	548	10	13	133.39	2	564.85
	CTRL-Rep-1	3504.24	69366	550	78	74.38	Carbamidomethyl+C(4);Carbamidomethyl+C(5)	LKECCEKPLLEK	298	12	17	186.59	3	516.264
	CTRL-Rep-1	3504.24	69366	550	78	74.38		DVFLGMFLYEYARR	347	14	3	38.15	2	890.447
	CTRL-Rep-1	3504.24	69366	550	78	74.38	Carbamidomethyl+C(3)	ETCFAEEGKK	588	10	4	32.43	2	599.775
	CTRL-Rep-1	3504.24	69366	550	78	74.38		RHPYFYAPELLFFAK	168	15	5	43.17	2	950.004
	CTRL-Rep-1	3504.24	69366	550	78	74.38	Oxidation+M(6)	DVFLGMFLYEYAR	347	13	6	52.41	2	820.396
	CTRL-Rep-1	3504.24	69366	550	78	74.38		DELRDEGK	206	8	6	59.8	2	481.228
	CTRL-Rep-1	3504.24	69366	550	78	74.38	Carbamidomethyl+C(3);Carbamidomethyl+C(4)	KECCEKPLLEK	299	11	4	36.02	3	478.572
	CTRL-Rep-1	3504.24	69366	550	78	74.38		HTLFGDK	90	7	2	25.71	2	409.211
	CTRL-Rep-1	3504.24	69366	550	78	74.38		NEVTEFAK	67	8	8	40.67	1	937.458
	CTRL-Rep-1	3504.24	69366	550	78	74.38	Carbamidomethyl+C(12)	VLIAFAQYLQQCPFEDHVK	46	19	2	13.78	3	769.39
	CTRL-Rep-1	3504.24	69366	550	78	74.38		MDDFAAFVEK	571	10	6	86.99	2	586.772
	CTRL-Rep-1	3504.24	69366	550	78	74.38	Carbamidomethyl+C(3)	QQCPFEDHVK	55	10	0	4.67	2	644.296
	CTRL-Rep-1	3504.24	69366	550	78	74.38		EFAEVSK	250	7	0	0.88	2	405.205
	CTRL-Rep-1	3504.24	69366	550	78	74.38	Carbamidomethyl+C(1)	CTVATLR	98	7	4	27.18	2	410.717
	CTRL-Rep-1	3504.24	69366	550	78	74.38	Carbamidomethyl+C(5)	YLQQCPFEDHVK	53	12	3	22.23	2	782.368
	CTRL-Rep-1	3504.24	69366	550	78	74.38	Carbamidomethyl+C(4)	LQQCPFEDHVK	54	11	0	4.67	2	700.837
	CTRL-Rep-1	3504.24	69366	550	78	74.38		DEFKPLVEEPQNLIK	398	15	5	43.57	2	899.989
	CTRL-Rep-1	3504.24	69366	550	78	74.38	Carbamidomethyl+C(11)	LIAFAQYLQQCPFEDHVK	47	18	3	37.19	3	736.364
	CTRL-Rep-1	3504.24	69366	550	78	74.38	Carbamidomethyl+C(9)	AFAQYLQQCPFEDHVK	49	16	3	26.05	3	660.98
	CTRL-Rep-1	3504.24	69366	550	78	74.38	Carbamidomethyl+C(10)	IAFAQYLQQCPFEDHVK	48	17	7	65.68	3	698.674
	CTRL-Rep-1	3504.24	69366	550	78	74.38	Carbamidomethyl+C(7)	AQYLQQCPFEDHVK	51	14	1	7.29	3	588.277
	CTRL-Rep-1	3504.24	69366	550	78	74.38		QNALLVR	427	7	1	10.76	2	407.248
	CTRL-Rep-1	3504.24	69366	550	78	74.38		EQLGEYK	419	7	3	7.97	2	433.719
	CTRL-Rep-1	3504.24	69366	550	78	74.38	Carbamidomethyl+C(1)	CPFEDHVK	57	8	2	13.78	2	516.233
	CTRL-Rep-1	3504.24	69366	550	78	74.38		ALVELVK	551	7	1	9.81	1	771.498
	CTRL-Rep-1	3504.24	69366	550	78	74.38		QTALVELVK	549	9	0	1.17	2	491.797
	CTRL-Rep-1	3504.24	69366	550	78	74.38		DDNPNLPR	130	8	0	0.88	2	462.216
	CTRL-Rep-1	3504.24	69366	550	78	74.38	Carbamidomethyl+C(3)	NECFLQHKDDNPNLPR	122	16	0	3.21	4	495.724
	CTRL-Rep-1	3504.24	69366	550	78	74.38		AEFAEVSK	249	8	0	0.88	2	431.719
	CTRL-Rep-1	3504.24	69366	550	78	74.38	Carbamidomethyl+C(2)	LCTVATLR	97	8	0	0.88	2	458.253
	CTRL-Rep-1	3504.24	69366	550	78	74.38		FQNALLVR	426	8	0	0.88	2	472.271
	CTRL-Rep-1	3504.24	69366	550	78	74.38		TYETTLEK	375	8	1	10.76	2	483.742
	CTRL-Rep-1	3504.24	69366	550	78	74.38		LVAASQAALGL	598	11	0	1.75	2	498.295
	CTRL-Rep-1	3504.24	69366	550	78	74.38	Carbamidomethyl+C(14)	EFNAETFTFHADICTLSEKER	524	21	0	4.67	4	632.54
	CTRL-Rep-1	3504.24	69366	550	78	74.38		VFDEFKPLVEEPQNLIK	396	17	0	3.51	3	676.692
	CTRL-Rep-1	3504.24	69366	550	78	74.38		DLGEENFK	36	8	1	10.76	2	467.216
	CTRL-Rep-1	3504.24	69366	550	78	74.38	Carbamidomethyl+C(14)	ALVLIAFAQYLQQCPFEDHVK	44	21	0	4.67	4	619.066
	CTRL-Rep-3	3366.41	69366	513	76	72.41		FQNALLVR	426	8	16	99.42	2	480.78
	CTRL-Rep-3	3366.41	69366	513	76	72.41		LVNEVTEFAK	65	10	20	126.03	2	575.309
	CTRL-Rep-3	3366.41	69366	513	76	72.41		QTALVELVK	549	9	16	88.23	2	500.803
	CTRL-Rep-3	3366.41	69366	513	76	72.41	Carbamidomethyl+C(4);Carbamidomethyl+C(5)	LKECCEKPLLEK	298	12	15	140.17	3	516.266
	CTRL-Rep-3	3366.41	69366	513	76	72.41		TYETTLEK	375	8	12	83.16	2	492.746
	CTRL-Rep-3	3366.41	69366	513	76	72.41	Carbamidomethyl+C(2)	LCTVATLR	97	8	11	83.16	2	467.265
	CTRL-Rep-3	3366.41	69366	513	76	72.41	Carbamidomethyl+C(1);Carbamidomethyl+C(2)	CCTESLVNR	499	9	16	96.72	2	569.75
	CTRL-Rep-3	3366.41	69366	513	76	72.41		LDELRDEGK	205	9	17	146.25	2	537.771
	CTRL-Rep-3	3366.41	69366	513	76	72.41		AVMDDFAAFVEK	569	12	16	165.37	2	671.819
	CTRL-Rep-3	3366.41	69366	513	76	72.41	Carbamidomethyl+C(3)	QNCELFEQLGEYK	413	13	26	180.97	2	829.375
	CTRL-Rep-3	3366.41	69366	513	76	72.41	Carbamidomethyl+C(3)	YICENQDSISSK	286	12	26	149.9	2	722.319
	CTRL-Rep-3	3366.41	69366	513	76	72.41	Carbamidomethyl+C(6);Carbamidomethyl+C(7)	AAFTECCQAADK	186	12	18	168.38	2	686.285
	CTRL-Rep-3	3366.41	69366	513	76	72.41	Carbamidomethyl+C(14)	ALVLIAFAQYLQQCPFEDHVK	44	21	37	318.89	3	830.762
	CTRL-Rep-3	3366.41	69366	513	76	72.41	Carbamidomethyl+C(3)	RPCFSALEVDETYVPK	508	16	25	211.59	3	637.642
	CTRL-Rep-3	3366.41	69366	513	76	72.41		SLHTLFGDK	88	9	10	83.46	2	509.269
	CTRL-Rep-3	3366.41	69366	513	76	72.41	Carbamidomethyl+C(2);Carbamidomethyl+C(11)	TCVADESAENCDK	75	13	38	263.49	2	749.789
	CTRL-Rep-3	3366.41	69366	513	76	72.41		HPYFYAPELLFFAK	169	14	12	86.93	3	581.63
	CTRL-Rep-3	3366.41	69366	513	76	72.41	Carbamidomethyl+C(9);Carbamidomethyl+C(10)	ETYGEMADCCAK	105	12	11	118.15	2	717.767
	CTRL-Rep-3	3366.41	69366	513	76	72.41		DDNPNLPR	130	8	7	68.66	2	470.725
	CTRL-Rep-3	3366.41	69366	513	76	72.41	Carbamidomethyl+C(5);Carbamidomethyl+C(6);Carbamidomethyl+C(13)	VHTECCHGDLLECADDR	264	17	14	102.96	3	696.282
	CTRL-Rep-3	3366.41	69366	513	76	72.41	Carbamidomethyl+C(3)	SHCIAEVENDEMPADLPSLAADFVESK	310	27	23	159.58	3	992.116
	CTRL-Rep-3	3366.41	69366	513	76	72.41	Carbamidomethyl+C(14)	EFNAETFTFHADICTLSEKER	524	21	14	112.86	4	637.041
	CTRL-Rep-3	3366.41	69366	513	76	72.41	Carbamidomethyl+C(7)	ADDKETCFAEEGK	584	13	17	129.68	3	500.543
	CTRL-Rep-3	3366.41	69366	513	76	72.41	Carbamidomethyl+C(3);Carbamidomethyl+C(16)	MPCAEDYLSVVLNQLCVLHEK	469	21	11	95.62	3	840.076
	CTRL-Rep-3	3366.41	69366	513	76	72.41	Carbamidomethyl+C(14)	EFNAETFTFHADICTLSEK	524	19	12	57.6	3	754.01
	CTRL-Rep-3	3366.41	69366	513	76	72.41		VPQVSTPTLVEVSR	438	14	8	65.94	2	756.428
	CTRL-Rep-3	3366.41	69366	513	76	72.41	Carbamidomethyl+C(3)	NECFLQHK	122	8	8	68.66	2	538.252
	CTRL-Rep-3	3366.41	69366	513	76	72.41		YLYEIAR	161	7	6	73.12	2	464.248
	CTRL-Rep-3	3366.41	69366	513	76	72.41		AEFAEVSK	249	8	6	58.92	2	440.721
	CTRL-Rep-3	3366.41	69366	513	76	72.41		VFDEFKPLVEEPQNLIK	396	17	6	25.94	3	682.365
	CTRL-Rep-3	3366.41	69366	513	76	72.41		DVFLGMFLYEYAR	347	13	4	23.68	2	812.405
	CTRL-Rep-3	3366.41	69366	513	76	72.41	Carbamidomethyl+C(3)	ETCFAEEGKK	588	10	4	37.24	2	599.776
	CTRL-Rep-3	3366.41	69366	513	76	72.41	Carbamidomethyl+C(1);Carbamidomethyl+C(2);Carbamidomethyl+C(10)	CCAAADPHECYAK	383	13	20	226.7	3	518.196
	CTRL-Rep-3	3366.41	69366	513	76	72.41	Carbamidomethyl+C(10)	LVRPEVDVMCTAFHDNEETFLK	138	22	12	88.97	4	663.313
	CTRL-Rep-3	3366.41	69366	513	76	72.41		LVTDLTK	257	7	4	55.61	2	395.236
	CTRL-Rep-3	3366.41	69366	513	76	72.41		TPVSDR	490	6	1	14.81	1	674.342
	CTRL-Rep-3	3366.41	69366	513	76	72.41		KVPQVSTPTLVEVSR	437	15	16	156.58	2	820.468
	CTRL-Rep-3	3366.41	69366	513	76	72.41	Carbamidomethyl+C(11)	SLHTLFGDKLCTVATLR	88	17	14	117.88	3	644.681
	CTRL-Rep-3	3366.41	69366	513	76	72.41		RHPYFYAPELLFFAK	168	15	17	221.29	3	633.663
	CTRL-Rep-3	3366.41	69366	513	76	72.41		KQTALVELVK	548	10	15	164.07	2	564.85
	CTRL-Rep-3	3366.41	69366	513	76	72.41	Carbamidomethyl+C(4);Carbamidomethyl+C(5)	LKECCEKPLLEK	298	12	17	179.88	3	516.265
	CTRL-Rep-3	3366.41	69366	513	76	72.41		TPVSDRVTK	490	9	4	33.93	2	501.779
	CTRL-Rep-3	3366.41	69366	513	76	72.41		LDELRDEGK	205	9	4	33.93	2	537.781
	CTRL-Rep-3	3366.41	69366	513	76	72.41	Carbamidomethyl+C(9);Carbamidomethyl+C(10)	ETYGEMADCCAKQEPER	105	17	4	18.95	3	691.953
	CTRL-Rep-3	3366.41	69366	513	76	72.41	Oxidation+M(6)	DVFLGMFLYEYAR	347	13	4	38.39	2	820.395
	CTRL-Rep-3	3366.41	69366	513	76	72.41	Carbamidomethyl+C(3);Carbamidomethyl+C(4)	KECCEKPLLEK	299	11	5	35.63	3	478.57
	CTRL-Rep-3	3366.41	69366	513	76	72.41		PELLFFAK	175	8	0	2.72	2	482.777
	CTRL-Rep-3	3366.41	69366	513	76	72.41		HTLFGDK	90	7	3	25.45	2	409.21
	CTRL-Rep-3	3366.41	69366	513	76	72.41		NEVTEFAK	67	8	7	37.24	1	937.455
	CTRL-Rep-3	3366.41	69366	513	76	72.41	Carbamidomethyl+C(12)	VLIAFAQYLQQCPFEDHVK	46	19	1	7.3	3	769.391
	CTRL-Rep-3	3366.41	69366	513	76	72.41		MDDFAAFVEK	571	10	3	38.64	2	586.77
	CTRL-Rep-3	3366.41	69366	513	76	72.41		DETYVPK	517	7	6	37.3	1	851.41
	CTRL-Rep-3	3366.41	69366	513	76	72.41	Carbamidomethyl+C(3)	QQCPFEDHVK	55	10	0	4.84	2	644.298
	CTRL-Rep-3	3366.41	69366	513	76	72.41	Carbamidomethyl+C(5)	YLQQCPFEDHVK	53	12	6	33.52	2	782.372
	CTRL-Rep-3	3366.41	69366	513	76	72.41	Carbamidomethyl+C(4)	LQQCPFEDHVK	54	11	2	13.64	2	700.837
	CTRL-Rep-3	3366.41	69366	513	76	72.41	Carbamidomethyl+C(11)	LIAFAQYLQQCPFEDHVK	47	18	3	36.89	3	736.369
	CTRL-Rep-3	3366.41	69366	513	76	72.41		EVDETYVPK	515	9	1	7.42	2	540.269
	CTRL-Rep-3	3366.41	69366	513	76	72.41	Carbamidomethyl+C(10)	IAFAQYLQQCPFEDHVK	48	17	4	36.89	3	698.676
	CTRL-Rep-3	3366.41	69366	513	76	72.41	Carbamidomethyl+C(9)	AFAQYLQQCPFEDHVK	49	16	7	49.17	3	660.977
	CTRL-Rep-3	3366.41	69366	513	76	72.41		QNALLVR	427	7	0	0.91	2	407.246
	CTRL-Rep-3	3366.41	69366	513	76	72.41	Carbamidomethyl+C(7)	AQYLQQCPFEDHVK	51	14	3	25.75	3	588.273
	CTRL-Rep-3	3366.41	69366	513	76	72.41	Carbamidomethyl+C(1)	CFAEEGKK	590	8	0	1.51	2	484.733
	CTRL-Rep-3	3366.41	69366	513	76	72.41		FAEEGKK	591	7	0	1.51	2	404.709
	CTRL-Rep-3	3366.41	69366	513	76	72.41	Carbamidomethyl+C(1)	CPFEDHVK	57	8	1	7.3	2	516.235
	CTRL-Rep-3	3366.41	69366	513	76	72.41	Carbamidomethyl+C(5)	DKETCFAEEGK	586	11	1	7.89	2	657.29
	CTRL-Rep-3	3366.41	69366	513	76	72.41	Carbamidomethyl+C(6)	DDKETCFAEEGK	585	12	2	7.89	2	714.797
	CTRL-Rep-3	3366.41	69366	513	76	72.41		QTALVELVK	549	9	0	1.21	2	491.795
	CTRL-Rep-3	3366.41	69366	513	76	72.41		DDNPNLPR	130	8	0	0.91	2	462.214
	CTRL-Rep-3	3366.41	69366	513	76	72.41	Carbamidomethyl+C(2)	LCTVATLR	97	8	0	0.91	2	458.253
	CTRL-Rep-3	3366.41	69366	513	76	72.41		FQNALLVR	426	8	0	0.91	2	472.271
	CTRL-Rep-3	3366.41	69366	513	76	72.41	Carbamidomethyl+C(3)	RPCFSALEVDETYVPK	508	16	0	3.33	3	631.64
	CTRL-Rep-3	3366.41	69366	513	76	72.41		TYETTLEK	375	8	0	0.91	2	483.741
	CTRL-Rep-3	3366.41	69366	513	76	72.41	Carbamidomethyl+C(14)	EFNAETFTFHADICTLSEKER	524	21	0	4.84	4	632.538
	CTRL-Rep-3	3366.41	69366	513	76	72.41	Carbamidomethyl+C(5);Carbamidomethyl+C(6);Carbamidomethyl+C(13)	VHTECCHGDLLECADDR	264	17	0	3.63	4	517.958
	CTRL-Rep-3	3366.41	69366	513	76	72.41		LVNEVTEFAK	65	10	0	1.51	2	566.796
	CTRL-Rep-3	3366.41	69366	513	76	72.41	Carbamidomethyl+C(14)	ALVLIAFAQYLQQCPFEDHVK	44	21	0	4.84	4	619.069
	CTRL-Rep-4	3657.35	69366	557	86	77.83		LVNEVTEFAK	65	10	18	123.77	2	575.308
	CTRL-Rep-4	3657.35	69366	557	86	77.83		VFDEFKPLVEEPQNLIK	396	17	32	286.27	3	682.363
	CTRL-Rep-4	3657.35	69366	557	86	77.83		QTALVELVK	549	9	13	87.91	2	500.804
	CTRL-Rep-4	3657.35	69366	557	86	77.83	Carbamidomethyl+C(4);Carbamidomethyl+C(5)	LKECCEKPLLEK	298	12	15	141.84	3	516.269
	CTRL-Rep-4	3657.35	69366	557	86	77.83		YLYEIAR	161	7	9	58.4	2	464.247
	CTRL-Rep-4	3657.35	69366	557	86	77.83		LDELRDEGK	205	9	20	145.69	2	537.774
	CTRL-Rep-4	3657.35	69366	557	86	77.83	Carbamidomethyl+C(1);Carbamidomethyl+C(2)	CCTESLVNR	499	9	18	96.33	2	569.753
	CTRL-Rep-4	3657.35	69366	557	86	77.83		AVMDDFAAFVEK	569	12	18	162.5	2	671.822
	CTRL-Rep-4	3657.35	69366	557	86	77.83	Carbamidomethyl+C(2)	LCTVATLR	97	8	11	82.83	2	467.266
	CTRL-Rep-4	3657.35	69366	557	86	77.83		AEFAEVSK	249	8	15	102.05	2	440.721
	CTRL-Rep-4	3657.35	69366	557	86	77.83	Carbamidomethyl+C(3)	QNCELFEQLGEYK	413	13	39	251.06	2	829.376
	CTRL-Rep-4	3657.35	69366	557	86	77.83	Carbamidomethyl+C(3)	YICENQDSISSK	286	12	23	179.16	2	722.323
	CTRL-Rep-4	3657.35	69366	557	86	77.83	Carbamidomethyl+C(6);Carbamidomethyl+C(7)	AAFTECCQAADK	186	12	19	167.73	2	686.287
	CTRL-Rep-4	3657.35	69366	557	86	77.83	Carbamidomethyl+C(14)	ALVLIAFAQYLQQCPFEDHVK	44	21	37	301.53	3	830.76
	CTRL-Rep-4	3657.35	69366	557	86	77.83		SLHTLFGDK	88	9	13	97.58	2	509.268
	CTRL-Rep-4	3657.35	69366	557	86	77.83	Carbamidomethyl+C(3)	RPCFSALEVDETYVPK	508	16	28	286.29	3	637.646
	CTRL-Rep-4	3657.35	69366	557	86	77.83	Carbamidomethyl+C(2);Carbamidomethyl+C(11)	TCVADESAENCDK	75	13	36	233.6	2	749.788
	CTRL-Rep-4	3657.35	69366	557	86	77.83	Carbamidomethyl+C(9);Carbamidomethyl+C(10)	ETYGEMADCCAK	105	12	17	134.85	2	717.768
	CTRL-Rep-4	3657.35	69366	557	86	77.83		DLGEENFK	36	8	6	39.49	2	476.221
	CTRL-Rep-4	3657.35	69366	557	86	77.83		DDNPNLPR	130	8	5	44.26	2	470.728
	CTRL-Rep-4	3657.35	69366	557	86	77.83	Carbamidomethyl+C(5);Carbamidomethyl+C(6);Carbamidomethyl+C(13)	VHTECCHGDLLECADDR	264	17	14	119.95	3	696.28
	CTRL-Rep-4	3657.35	69366	557	86	77.83	Carbamidomethyl+C(3)	SHCIAEVENDEMPADLPSLAADFVESK	310	27	17	117.74	3	992.116
	CTRL-Rep-4	3657.35	69366	557	86	77.83	Carbamidomethyl+C(3)	NECFLQHKDDNPNLPR	122	16	18	115.59	3	666.31
	CTRL-Rep-4	3657.35	69366	557	86	77.83	Carbamidomethyl+C(14)	EFNAETFTFHADICTLSEK	524	19	12	77.94	3	754.01
	CTRL-Rep-4	3657.35	69366	557	86	77.83	Carbamidomethyl+C(7)	ADDKETCFAEEGK	584	13	14	79.57	3	500.543
	CTRL-Rep-4	3657.35	69366	557	86	77.83	Carbamidomethyl+C(3);Carbamidomethyl+C(16)	MPCAEDYLSVVLNQLCVLHEK	469	21	10	76.67	3	840.073
	CTRL-Rep-4	3657.35	69366	557	86	77.83		VPQVSTPTLVEVSR	438	14	12	101.01	2	756.427
	CTRL-Rep-4	3657.35	69366	557	86	77.83		FQNALLVR	426	8	11	99.04	2	480.785
	CTRL-Rep-4	3657.35	69366	557	86	77.83	Carbamidomethyl+C(3)	NECFLQHK	122	8	7	68.38	2	538.253
	CTRL-Rep-4	3657.35	69366	557	86	77.83		TYETTLEK	375	8	4	52.04	2	492.749
	CTRL-Rep-4	3657.35	69366	557	86	77.83	Carbamidomethyl+C(3);Carbamidomethyl+C(30)	RPCFSALEVDETYVPKEFNAETFTFHADICTLSEKER	508	37	5	23.15	5	888.213
	CTRL-Rep-4	3657.35	69366	557	86	77.83		FKDLGEENFK	34	10	6	44.55	2	613.806
	CTRL-Rep-4	3657.35	69366	557	86	77.83		DVFLGMFLYEYAR	347	13	4	31.02	2	812.4
	CTRL-Rep-4	3657.35	69366	557	86	77.83	Carbamidomethyl+C(1);Carbamidomethyl+C(2);Carbamidomethyl+C(10)	CCAAADPHECYAK	383	13	18	208.36	3	518.197
	CTRL-Rep-4	3657.35	69366	557	86	77.83		HPYFYAPELLFFAK	169	14	11	115.97	3	581.629
	CTRL-Rep-4	3657.35	69366	557	86	77.83		AWAVAR	236	6	3	43.65	1	673.37
	CTRL-Rep-4	3657.35	69366	557	86	77.83		LVAASQAALGL	598	11	3	34.39	2	507.301
	CTRL-Rep-4	3657.35	69366	557	86	77.83	Carbamidomethyl+C(10)	LVRPEVDVMCTAFHDNEETFLK	138	22	8	49.38	4	663.313
	CTRL-Rep-4	3657.35	69366	557	86	77.83		LVTDLTK	257	7	6	69.84	2	395.234
	CTRL-Rep-4	3657.35	69366	557	86	77.83		TPVSDR	490	6	2	29.2	1	674.341
	CTRL-Rep-4	3657.35	69366	557	86	77.83		FGER	229	4	1	14.14	1	508.251
	CTRL-Rep-4	3657.35	69366	557	86	77.83		LDELR	205	5	1	14.45	1	645.349
	CTRL-Rep-4	3657.35	69366	557	86	77.83		KVPQVSTPTLVEVSR	437	15	17	185.11	2	820.467
	CTRL-Rep-4	3657.35	69366	557	86	77.83	Carbamidomethyl+C(11)	SLHTLFGDKLCTVATLR	88	17	18	172.89	3	644.677
	CTRL-Rep-4	3657.35	69366	557	86	77.83		KQTALVELVK	548	10	12	129.79	2	564.851
	CTRL-Rep-4	3657.35	69366	557	86	77.83		LSQRFPK	242	7	5	55.39	2	438.254
	CTRL-Rep-4	3657.35	69366	557	86	77.83		LDELRDEGK	205	9	4	49.47	2	537.774
	CTRL-Rep-4	3657.35	69366	557	86	77.83	Carbamidomethyl+C(8)	ADLAKYICENQDSISSK	281	17	4	25.81	3	647.982
	CTRL-Rep-4	3657.35	69366	557	86	77.83	Oxidation+M(6)	DVFLGMFLYEYAR	347	13	6	46.69	2	820.395
	CTRL-Rep-4	3657.35	69366	557	86	77.83	Carbamidomethyl+C(3);Oxidation+M(12)	SHCIAEVENDEMPADLPSLAADFVESK	310	27	4	20.54	3	997.452
	CTRL-Rep-4	3657.35	69366	557	86	77.83		DELRDEGK	206	8	6	59.01	2	481.227
	CTRL-Rep-4	3657.35	69366	557	86	77.83	Carbamidomethyl+C(3);Carbamidomethyl+C(4)	KECCEKPLLEK	299	11	5	35.49	3	478.571
	CTRL-Rep-4	3657.35	69366	557	86	77.83		ELRDEGK	207	7	8	59.01	2	423.715
	CTRL-Rep-4	3657.35	69366	557	86	77.83		NEVTEFAK	67	8	4	22.64	1	937.453
	CTRL-Rep-4	3657.35	69366	557	86	77.83		HTLFGDK	90	7	2	9.65	2	409.21
	CTRL-Rep-4	3657.35	69366	557	86	77.83		QNALLVR	427	7	0	0.92	2	407.25
	CTRL-Rep-4	3657.35	69366	557	86	77.83	Carbamidomethyl+C(12)	VLIAFAQYLQQCPFEDHVK	46	19	2	13.59	3	769.389
	CTRL-Rep-4	3657.35	69366	557	86	77.83		EFAEVSK	250	7	0	0.92	2	405.206
	CTRL-Rep-4	3657.35	69366	557	86	77.83	Carbamidomethyl+C(1)	CTVATLR	98	7	2	10.6	2	410.717
	CTRL-Rep-4	3657.35	69366	557	86	77.83		DETYVPK	517	7	5	37.17	1	851.413
	CTRL-Rep-4	3657.35	69366	557	86	77.83	Carbamidomethyl+C(3)	QQCPFEDHVK	55	10	2	7.31	2	644.293
	CTRL-Rep-4	3657.35	69366	557	86	77.83		DEFKPLVEEPQNLIK	398	15	6	74.13	2	899.986
	CTRL-Rep-4	3657.35	69366	557	86	77.83	Carbamidomethyl+C(5)	YLQQCPFEDHVK	53	12	5	40.76	2	782.365
	CTRL-Rep-4	3657.35	69366	557	86	77.83	Carbamidomethyl+C(4)	LQQCPFEDHVK	54	11	1	7.31	2	700.838
	CTRL-Rep-4	3657.35	69366	557	86	77.83		EVDETYVPK	515	9	1	7.4	2	540.271
	CTRL-Rep-4	3657.35	69366	557	86	77.83	Carbamidomethyl+C(2)	ECFLQHKDDNPNLPR	123	15	2	7.4	3	628.296
	CTRL-Rep-4	3657.35	69366	557	86	77.83		MDDFAAFVEK	571	10	3	32.48	2	586.771
	CTRL-Rep-4	3657.35	69366	557	86	77.83	Carbamidomethyl+C(11)	LIAFAQYLQQCPFEDHVK	47	18	3	36.78	3	736.365
	CTRL-Rep-4	3657.35	69366	557	86	77.83	Carbamidomethyl+C(9)	AFAQYLQQCPFEDHVK	49	16	5	48.94	3	660.978
	CTRL-Rep-4	3657.35	69366	557	86	77.83	Carbamidomethyl+C(10)	IAFAQYLQQCPFEDHVK	48	17	4	51.55	3	698.673
	CTRL-Rep-4	3657.35	69366	557	86	77.83		YETTLEK	376	7	0	0.92	1	883.434
	CTRL-Rep-4	3657.35	69366	557	86	77.83	Carbamidomethyl+C(6)	DDKETCFAEEGK	585	12	4	38.01	2	714.802
	CTRL-Rep-4	3657.35	69366	557	86	77.83		ALVELVK	551	7	0	1.23	1	771.499
	CTRL-Rep-4	3657.35	69366	557	86	77.83	Carbamidomethyl+C(5)	DKETCFAEEGK	586	11	1	7.87	2	657.288
	CTRL-Rep-4	3657.35	69366	557	86	77.83	Carbamidomethyl+C(2)	QCPFEDHVK	56	9	0	4.9	2	580.268
	CTRL-Rep-4	3657.35	69366	557	86	77.83	Carbamidomethyl+C(1)	CPFEDHVK	57	8	2	22.04	2	516.236
	CTRL-Rep-4	3657.35	69366	557	86	77.83		QTALVELVK	549	9	0	1.23	2	491.798
	CTRL-Rep-4	3657.35	69366	557	86	77.83		DDNPNLPR	130	8	0	0.92	2	462.217
	CTRL-Rep-4	3657.35	69366	557	86	77.83	Carbamidomethyl+C(2)	LCTVATLR	97	8	0	0.92	2	458.253
	CTRL-Rep-4	3657.35	69366	557	86	77.83		AEFAEVSK	249	8	0	0.92	2	431.718
	CTRL-Rep-4	3657.35	69366	557	86	77.83	Carbamidomethyl+C(3)	RPCFSALEVDETYVPK	508	16	0	3.37	3	631.644
	CTRL-Rep-4	3657.35	69366	557	86	77.83	Carbamidomethyl+C(5);Carbamidomethyl+C(6);Carbamidomethyl+C(13)	VHTECCHGDLLECADDR	264	17	0	3.68	4	517.956
	CTRL-Rep-4	3657.35	69366	557	86	77.83		LDELRDEGK	205	9	0	1.23	3	352.844
	CTRL-Rep-4	3657.35	69366	557	86	77.83	Carbamidomethyl+C(14)	ALVLIAFAQYLQQCPFEDHVK	44	21	0	4.9	4	619.065
	CTRL-Rep-4	3657.35	69366	557	86	77.83		DLGEENFK	36	8	1	10.6	2	467.215
	CTRL-Rep-4	3657.35	69366	557	86	77.83		LVNEVTEFAK	65	10	0	1.53	2	566.796
	POAG-Rep-1	3719.59	69366	526	79	72.09		LVNEVTEFAK	65	10	19	128.07	2	575.31
	POAG-Rep-1	3719.59	69366	526	79	72.09		VFDEFKPLVEEPQNLIK	396	17	34	331.66	3	682.364
	POAG-Rep-1	3719.59	69366	526	79	72.09		QTALVELVK	549	9	17	89.59	2	500.803
	POAG-Rep-1	3719.59	69366	526	79	72.09		YLYEIAR	161	7	8	59.53	2	464.246
	POAG-Rep-1	3719.59	69366	526	79	72.09	Carbamidomethyl+C(4);Carbamidomethyl+C(5)	LKECCEKPLLEK	298	12	15	153.35	3	516.267
	POAG-Rep-1	3719.59	69366	526	79	72.09		TYETTLEK	375	8	15	104.04	2	492.746
	POAG-Rep-1	3719.59	69366	526	79	72.09	Carbamidomethyl+C(2)	LCTVATLR	97	8	12	84.53	2	467.265
	POAG-Rep-1	3719.59	69366	526	79	72.09	Carbamidomethyl+C(3)	QNCELFEQLGEYK	413	13	25	155.98	2	829.378
	POAG-Rep-1	3719.59	69366	526	79	72.09	Carbamidomethyl+C(1);Carbamidomethyl+C(2)	CCTESLVNR	499	9	16	98.31	2	569.751
	POAG-Rep-1	3719.59	69366	526	79	72.09	Carbamidomethyl+C(1);Carbamidomethyl+C(2);Carbamidomethyl+C(10)	CCAAADPHECYAK	383	13	19	186.92	3	518.198
	POAG-Rep-1	3719.59	69366	526	79	72.09		AEFAEVSK	249	8	13	89.3	2	440.721
	POAG-Rep-1	3719.59	69366	526	79	72.09		AVMDDFAAFVEK	569	12	16	171.1	2	671.818
	POAG-Rep-1	3719.59	69366	526	79	72.09	Carbamidomethyl+C(3)	RPCFSALEVDETYVPK	508	16	28	261.48	3	637.641
	POAG-Rep-1	3719.59	69366	526	79	72.09	Carbamidomethyl+C(3)	NECFLQHKDDNPNLPR	122	16	26	188.05	4	499.982
	POAG-Rep-1	3719.59	69366	526	79	72.09	Carbamidomethyl+C(14)	ALVLIAFAQYLQQCPFEDHVK	44	21	33	292.92	3	830.76
	POAG-Rep-1	3719.59	69366	526	79	72.09		LDELRDEGK	205	9	19	148.54	2	537.773
	POAG-Rep-1	3719.59	69366	526	79	72.09		SLHTLFGDK	88	9	10	67.06	2	509.268
	POAG-Rep-1	3719.59	69366	526	79	72.09	Carbamidomethyl+C(6);Carbamidomethyl+C(7)	AAFTECCQAADK	186	12	19	153.35	2	686.287
	POAG-Rep-1	3719.59	69366	526	79	72.09	Carbamidomethyl+C(3)	YICENQDSISSK	286	12	22	182.83	2	722.324
	POAG-Rep-1	3719.59	69366	526	79	72.09	Carbamidomethyl+C(2);Carbamidomethyl+C(11)	TCVADESAENCDK	75	13	29	180.9	2	749.792
	POAG-Rep-1	3719.59	69366	526	79	72.09		HPYFYAPELLFFAK	169	14	12	95.24	3	581.63
	POAG-Rep-1	3719.59	69366	526	79	72.09		DDNPNLPR	130	8	10	69.79	2	470.726
	POAG-Rep-1	3719.59	69366	526	79	72.09	Carbamidomethyl+C(3)	SHCIAEVENDEMPADLPSLAADFVESK	310	27	18	98.45	3	992.12
	POAG-Rep-1	3719.59	69366	526	79	72.09	Carbamidomethyl+C(5);Carbamidomethyl+C(6);Carbamidomethyl+C(13)	VHTECCHGDLLECADDR	264	17	13	104.89	3	696.283
	POAG-Rep-1	3719.59	69366	526	79	72.09	Carbamidomethyl+C(9);Carbamidomethyl+C(10)	ETYGEMADCCAK	105	12	11	119.93	2	717.769
	POAG-Rep-1	3719.59	69366	526	79	72.09	Carbamidomethyl+C(3);Carbamidomethyl+C(16)	MPCAEDYLSVVLNQLCVLHEK	469	21	18	128.56	3	840.072
	POAG-Rep-1	3719.59	69366	526	79	72.09		LVAASQAALGL	598	11	8	62.87	2	507.303
	POAG-Rep-1	3719.59	69366	526	79	72.09	Carbamidomethyl+C(14)	EFNAETFTFHADICTLSEK	524	19	5	30.31	3	754.01
	POAG-Rep-1	3719.59	69366	526	79	72.09		VPQVSTPTLVEVSR	438	14	9	81.75	2	756.425
	POAG-Rep-1	3719.59	69366	526	79	72.09	Carbamidomethyl+C(3)	NECFLQHK	122	8	6	45.08	2	538.254
	POAG-Rep-1	3719.59	69366	526	79	72.09		FQNALLVR	426	8	10	101.03	2	480.785
	POAG-Rep-1	3719.59	69366	526	79	72.09	Carbamidomethyl+C(3)	ETCFAEEGKK	588	10	3	37.87	2	599.774
	POAG-Rep-1	3719.59	69366	526	79	72.09		NYAEAKDVFLGMFLYEYAR	341	19	4	17.85	4	575.776
	POAG-Rep-1	3719.59	69366	526	79	72.09	Carbamidomethyl+C(10)	LVRPEVDVMCTAFHDNEETFLK	138	22	13	126.88	4	663.313
	POAG-Rep-1	3719.59	69366	526	79	72.09		LDELR	205	5	1	14.74	1	645.36
	POAG-Rep-1	3719.59	69366	526	79	72.09		AWAVAR	236	6	1	15.03	1	673.382
	POAG-Rep-1	3719.59	69366	526	79	72.09	Carbamidomethyl+C(11)	SLHTLFGDKLCTVATLR	88	17	14	124.88	3	644.678
	POAG-Rep-1	3719.59	69366	526	79	72.09		KQTALVELVK	548	10	14	163.57	2	564.851
	POAG-Rep-1	3719.59	69366	526	79	72.09		EQLKAVMDDFAAFVEK	565	16	6	20.43	2	920.952
	POAG-Rep-1	3719.59	69366	526	79	72.09	Carbamidomethyl+C(3)	ETCFAEEGKK	588	10	4	46.59	2	599.778
	POAG-Rep-1	3719.59	69366	526	79	72.09	Oxidation+M(6)	DVFLGMFLYEYAR	347	13	7	67.51	2	820.396
	POAG-Rep-1	3719.59	69366	526	79	72.09	Carbamidomethyl+C(3);Oxidation+M(12)	SHCIAEVENDEMPADLPSLAADFVESK	310	27	9	54.96	4	748.332
	POAG-Rep-1	3719.59	69366	526	79	72.09		DELRDEGK	206	8	6	60.11	2	481.229
	POAG-Rep-1	3719.59	69366	526	79	72.09	Carbamidomethyl+C(3);Carbamidomethyl+C(4)	KECCEKPLLEK	299	11	4	36.23	3	478.571
	POAG-Rep-1	3719.59	69366	526	79	72.09		ELRDEGK	207	7	8	60.11	2	423.717
	POAG-Rep-1	3719.59	69366	526	79	72.09	Carbamidomethyl+C(4)	PHECYAK	389	7	6	54.26	2	452.702
	POAG-Rep-1	3719.59	69366	526	79	72.09		PELLFFAK	175	8	0	2.58	2	482.776
	POAG-Rep-1	3719.59	69366	526	79	72.09		HTLFGDK	90	7	3	25.86	2	409.211
	POAG-Rep-1	3719.59	69366	526	79	72.09	Carbamidomethyl+C(12)	VLIAFAQYLQQCPFEDHVK	46	19	2	13.86	3	769.39
	POAG-Rep-1	3719.59	69366	526	79	72.09		NEVTEFAK	67	8	7	40.88	1	937.46
	POAG-Rep-1	3719.59	69366	526	79	72.09		MDDFAAFVEK	571	10	5	54.95	2	586.771
	POAG-Rep-1	3719.59	69366	526	79	72.09	Carbamidomethyl+C(5)	YLQQCPFEDHVK	53	12	3	26.21	2	782.37
	POAG-Rep-1	3719.59	69366	526	79	72.09		DETYVPK	517	7	6	37.83	1	851.411
	POAG-Rep-1	3719.59	69366	526	79	72.09	Carbamidomethyl+C(3)	QQCPFEDHVK	55	10	1	7.29	2	644.295
	POAG-Rep-1	3719.59	69366	526	79	72.09		QNALLVR	427	7	0	0.86	2	407.248
	POAG-Rep-1	3719.59	69366	526	79	72.09	Carbamidomethyl+C(4)	LQQCPFEDHVK	54	11	5	41.62	2	700.836
	POAG-Rep-1	3719.59	69366	526	79	72.09	Carbamidomethyl+C(11)	LIAFAQYLQQCPFEDHVK	47	18	3	26.21	3	736.366
	POAG-Rep-1	3719.59	69366	526	79	72.09		EVDETYVPK	515	9	1	7.48	2	540.265
	POAG-Rep-1	3719.59	69366	526	79	72.09	Carbamidomethyl+C(9)	AFAQYLQQCPFEDHVK	49	16	4	44.63	3	660.977
	POAG-Rep-1	3719.59	69366	526	79	72.09		DEFKPLVEEPQNLIK	398	15	6	52.67	2	899.986
	POAG-Rep-1	3719.59	69366	526	79	72.09	Carbamidomethyl+C(10)	IAFAQYLQQCPFEDHVK	48	17	4	52.41	3	698.668
	POAG-Rep-1	3719.59	69366	526	79	72.09	Carbamidomethyl+C(7)	AQYLQQCPFEDHVK	51	14	3	22.31	3	588.274
	POAG-Rep-1	3719.59	69366	526	79	72.09	Carbamidomethyl+C(2)	ECFLQHKDDNPNLPR	123	15	1	7.48	3	628.298
	POAG-Rep-1	3719.59	69366	526	79	72.09	Carbamidomethyl+C(1);Carbamidomethyl+C(9)	CAAADPHECYAK	384	12	3	18.55	3	464.859
	POAG-Rep-1	3719.59	69366	526	79	72.09	Carbamidomethyl+C(1)	CFAEEGKK	590	8	0	1.43	2	484.731
	POAG-Rep-1	3719.59	69366	526	79	72.09		APELLFFAK	174	9	0	2.58	2	518.294
	POAG-Rep-1	3719.59	69366	526	79	72.09		ALVELVK	551	7	1	9.87	1	771.5
	POAG-Rep-1	3719.59	69366	526	79	72.09	Carbamidomethyl+C(8)	AAADPHECYAK	385	11	3	33.5	2	616.777
	POAG-Rep-1	3719.59	69366	526	79	72.09		QTALVELVK	549	9	0	1.15	2	491.795
	POAG-Rep-1	3719.59	69366	526	79	72.09	Carbamidomethyl+C(2)	LCTVATLR	97	8	0	0.86	2	458.255
	POAG-Rep-1	3719.59	69366	526	79	72.09		DDNPNLPR	130	8	0	0.86	2	462.215
	POAG-Rep-1	3719.59	69366	526	79	72.09		AEFAEVSK	249	8	0	0.86	2	431.719
	POAG-Rep-1	3719.59	69366	526	79	72.09	Carbamidomethyl+C(3)	RPCFSALEVDETYVPK	508	16	0	3.16	3	631.642
	POAG-Rep-1	3719.59	69366	526	79	72.09		TYETTLEK	375	8	0	0.86	2	483.743
	POAG-Rep-1	3719.59	69366	526	79	72.09		LVAASQAALGL	598	11	0	1.72	2	498.3
	POAG-Rep-1	3719.59	69366	526	79	72.09	Carbamidomethyl+C(5);Carbamidomethyl+C(6);Carbamidomethyl+C(13)	VHTECCHGDLLECADDR	264	17	0	3.44	4	517.955
	POAG-Rep-1	3719.59	69366	526	79	72.09	Carbamidomethyl+C(14)	ALVLIAFAQYLQQCPFEDHVK	44	21	0	4.59	4	619.063
	POAG-Rep-1	3719.59	69366	526	79	72.09	Carbamidomethyl+C(1);Carbamidomethyl+C(2);Carbamidomethyl+C(10)	CCAAADPHECYAK	383	13	0	2.29	3	512.195
	POAG-Rep-1	3719.59	69366	526	79	72.09	Carbamidomethyl+C(2);Carbamidomethyl+C(11)	TCVADESAENCDK	75	13	0	2.29	3	494.19
	POAG-Rep-2	4017.07	69366	553	80	74.55		FQNALLVR	426	8	12	85.7	2	480.784
	POAG-Rep-2	4017.07	69366	553	80	74.55		LVNEVTEFAK	65	10	16	125.43	2	575.309
	POAG-Rep-2	4017.07	69366	553	80	74.55		VFDEFKPLVEEPQNLIK	396	17	34	314.78	3	682.364
	POAG-Rep-2	4017.07	69366	553	80	74.55		QTALVELVK	549	9	20	98.87	2	500.804
	POAG-Rep-2	4017.07	69366	553	80	74.55	Carbamidomethyl+C(4);Carbamidomethyl+C(5)	LKECCEKPLLEK	298	12	24	207	3	516.268
	POAG-Rep-2	4017.07	69366	553	80	74.55	Carbamidomethyl+C(1);Carbamidomethyl+C(2);Carbamidomethyl+C(10)	CCAAADPHECYAK	383	13	26	228.79	3	518.2
	POAG-Rep-2	4017.07	69366	553	80	74.55		TYETTLEK	375	8	16	103.35	2	492.746
	POAG-Rep-2	4017.07	69366	553	80	74.55	Carbamidomethyl+C(2)	LCTVATLR	97	8	11	103.35	2	467.264
	POAG-Rep-2	4017.07	69366	553	80	74.55		AVMDDFAAFVEK	569	12	20	218.63	2	671.82
	POAG-Rep-2	4017.07	69366	553	80	74.55	Carbamidomethyl+C(1);Carbamidomethyl+C(2)	CCTESLVNR	499	9	13	89.01	2	569.751
	POAG-Rep-2	4017.07	69366	553	80	74.55	Carbamidomethyl+C(3)	NECFLQHKDDNPNLPR	122	16	21	110.76	4	499.983
	POAG-Rep-2	4017.07	69366	553	80	74.55		AEFAEVSK	249	8	11	74.07	2	440.72
	POAG-Rep-2	4017.07	69366	553	80	74.55		LDELRDEGK	205	9	18	129.91	2	537.773
	POAG-Rep-2	4017.07	69366	553	80	74.55	Carbamidomethyl+C(3)	RPCFSALEVDETYVPK	508	16	26	275.34	3	637.642
	POAG-Rep-2	4017.07	69366	553	80	74.55	Carbamidomethyl+C(3)	QNCELFEQLGEYK	413	13	31	194.28	2	829.377
	POAG-Rep-2	4017.07	69366	553	80	74.55	Carbamidomethyl+C(14)	ALVLIAFAQYLQQCPFEDHVK	44	21	36	299.8	3	830.758
	POAG-Rep-2	4017.07	69366	553	80	74.55	Carbamidomethyl+C(6);Carbamidomethyl+C(7)	AAFTECCQAADK	186	12	21	169.94	2	686.287
	POAG-Rep-2	4017.07	69366	553	80	74.55	Carbamidomethyl+C(3)	YICENQDSISSK	286	12	21	151.32	2	722.322
	POAG-Rep-2	4017.07	69366	553	80	74.55		SLHTLFGDK	88	9	10	66.59	2	509.269
	POAG-Rep-2	4017.07	69366	553	80	74.55	Carbamidomethyl+C(2);Carbamidomethyl+C(11)	TCVADESAENCDK	75	13	38	217.16	2	749.791
	POAG-Rep-2	4017.07	69366	553	80	74.55		DLGEENFK	36	8	11	59.44	2	476.221
	POAG-Rep-2	4017.07	69366	553	80	74.55	Carbamidomethyl+C(9);Carbamidomethyl+C(10)	ETYGEMADCCAK	105	12	14	125.35	2	717.77
	POAG-Rep-2	4017.07	69366	553	80	74.55		DDNPNLPR	130	8	10	74.07	2	470.73
	POAG-Rep-2	4017.07	69366	553	80	74.55	Carbamidomethyl+C(5);Carbamidomethyl+C(6);Carbamidomethyl+C(13)	VHTECCHGDLLECADDR	264	17	15	143.34	3	696.282
	POAG-Rep-2	4017.07	69366	553	80	74.55	Carbamidomethyl+C(3)	SHCIAEVENDEMPADLPSLAADFVESK	310	27	18	121.71	3	992.116
	POAG-Rep-2	4017.07	69366	553	80	74.55	Carbamidomethyl+C(3);Carbamidomethyl+C(16)	MPCAEDYLSVVLNQLCVLHEK	469	21	16	121.29	3	840.071
	POAG-Rep-2	4017.07	69366	553	80	74.55		HPYFYAPELLFFAK	169	14	10	84.78	3	581.63
	POAG-Rep-2	4017.07	69366	553	80	74.55	Carbamidomethyl+C(3)	NECFLQHK	122	8	6	59.44	2	538.255
	POAG-Rep-2	4017.07	69366	553	80	74.55		VPQVSTPTLVEVSR	438	14	9	81.31	2	756.424
	POAG-Rep-2	4017.07	69366	553	80	74.55	Carbamidomethyl+C(7)	ADDKETCFAEEGK	584	13	17	137.94	3	500.543
	POAG-Rep-2	4017.07	69366	553	80	74.55	Carbamidomethyl+C(14)	EFNAETFTFHADICTLSEK	524	19	8	79.1	3	754.01
	POAG-Rep-2	4017.07	69366	553	80	74.55		NYAEAKDVFLGMFLYEYAR	341	19	4	24.6	4	575.776
	POAG-Rep-2	4017.07	69366	553	80	74.55		HPYFYAPELLFFAKR	169	15	3	29.37	2	950.002
	POAG-Rep-2	4017.07	69366	553	80	74.55	Carbamidomethyl+C(10)	LVRPEVDVMCTAFHDNEETFLK	138	22	11	98.82	4	663.312
	POAG-Rep-2	4017.07	69366	553	80	74.55	Carbamidomethyl+C(3)	AACLLPK	198	7	5	73.78	1	772.433
	POAG-Rep-2	4017.07	69366	553	80	74.55		LVTDLTK	257	7	6	56.13	2	395.236
	POAG-Rep-2	4017.07	69366	553	80	74.55		LDELR	205	5	1	14.64	2	323.179
	POAG-Rep-2	4017.07	69366	553	80	74.55		TPVSDR	490	6	3	29.57	2	337.677
	POAG-Rep-2	4017.07	69366	553	80	74.55		DVFLGMFLYEYAR	347	13	3	24.01	3	541.925
	POAG-Rep-2	4017.07	69366	553	80	74.55		KVPQVSTPTLVEVSR	437	15	18	170.02	2	820.468
	POAG-Rep-2	4017.07	69366	553	80	74.55	Carbamidomethyl+C(11)	SLHTLFGDKLCTVATLR	88	17	18	173.49	3	644.677
	POAG-Rep-2	4017.07	69366	553	80	74.55		KQTALVELVK	548	10	15	177.13	2	564.85
	POAG-Rep-2	4017.07	69366	553	80	74.55		RHPYFYAPELLFFAK	168	15	6	55.8	3	633.663
	POAG-Rep-2	4017.07	69366	553	80	74.55		LSQRFPK	242	7	3	44.5	2	438.255
	POAG-Rep-2	4017.07	69366	553	80	74.55		LDELRDEGK	205	9	5	59.73	2	537.777
	POAG-Rep-2	4017.07	69366	553	80	74.55	Carbamidomethyl+C(8);Carbamidomethyl+C(9)	YKAAFTECCQAADK	184	14	3	30.33	2	831.858
	POAG-Rep-2	4017.07	69366	553	80	74.55		DELRDEGK	206	8	6	59.73	2	481.229
	POAG-Rep-2	4017.07	69366	553	80	74.55	Carbamidomethyl+C(3);Carbamidomethyl+C(4)	KECCEKPLLEK	299	11	6	60.61	3	478.571
	POAG-Rep-2	4017.07	69366	553	80	74.55	Carbamidomethyl+C(4)	PHECYAK	389	7	7	53.91	2	452.701
	POAG-Rep-2	4017.07	69366	553	80	74.55		PELLFFAK	175	8	0	2.64	2	482.776
	POAG-Rep-2	4017.07	69366	553	80	74.55		HTLFGDK	90	7	0	1.17	2	409.211
	POAG-Rep-2	4017.07	69366	553	80	74.55		NEVTEFAK	67	8	4	22.96	1	937.455
	POAG-Rep-2	4017.07	69366	553	80	74.55	Carbamidomethyl+C(12)	VLIAFAQYLQQCPFEDHVK	46	19	2	13.76	3	769.39
	POAG-Rep-2	4017.07	69366	553	80	74.55		DETYVPK	517	7	6	37.6	1	851.408
	POAG-Rep-2	4017.07	69366	553	80	74.55		EFAEVSK	250	7	0	0.88	2	405.207
	POAG-Rep-2	4017.07	69366	553	80	74.55		MDDFAAFVEK	571	10	6	86.88	2	586.77
	POAG-Rep-2	4017.07	69366	553	80	74.55	Carbamidomethyl+C(2)	ECFLQHKDDNPNLPR	123	15	0	3.23	3	628.297
	POAG-Rep-2	4017.07	69366	553	80	74.55	Carbamidomethyl+C(3)	QQCPFEDHVK	55	10	0	4.7	2	644.295
	POAG-Rep-2	4017.07	69366	553	80	74.55	Carbamidomethyl+C(5)	YLQQCPFEDHVK	53	12	4	26.01	2	782.366
	POAG-Rep-2	4017.07	69366	553	80	74.55		DEFKPLVEEPQNLIK	398	15	4	27.9	2	899.982
	POAG-Rep-2	4017.07	69366	553	80	74.55	Carbamidomethyl+C(4)	LQQCPFEDHVK	54	11	5	23	2	700.835
	POAG-Rep-2	4017.07	69366	553	80	74.55		EVDETYVPK	515	9	0	3.23	2	540.266
	POAG-Rep-2	4017.07	69366	553	80	74.55	Carbamidomethyl+C(9)	AFAQYLQQCPFEDHVK	49	16	7	49.69	3	660.978
	POAG-Rep-2	4017.07	69366	553	80	74.55	Carbamidomethyl+C(10)	IAFAQYLQQCPFEDHVK	48	17	8	78.59	3	698.673
	POAG-Rep-2	4017.07	69366	553	80	74.55	Carbamidomethyl+C(5)	DKETCFAEEGK	586	11	3	18.4	2	657.292
	POAG-Rep-2	4017.07	69366	553	80	74.55	Carbamidomethyl+C(1)	CPFEDHVK	57	8	1	7.29	2	516.23
	POAG-Rep-2	4017.07	69366	553	80	74.55		QTALVELVK	549	9	0	1.17	2	491.797
	POAG-Rep-2	4017.07	69366	553	80	74.55		DDNPNLPR	130	8	0	0.88	2	462.216
	POAG-Rep-2	4017.07	69366	553	80	74.55	Carbamidomethyl+C(2)	LCTVATLR	97	8	0	0.88	2	458.255
	POAG-Rep-2	4017.07	69366	553	80	74.55		AEFAEVSK	249	8	0	0.88	2	431.718
	POAG-Rep-2	4017.07	69366	553	80	74.55	Carbamidomethyl+C(3)	RPCFSALEVDETYVPK	508	16	0	3.23	3	631.64
	POAG-Rep-2	4017.07	69366	553	80	74.55		TYETTLEK	375	8	0	0.88	2	483.742
	POAG-Rep-2	4017.07	69366	553	80	74.55		FQNALLVR	426	8	0	0.88	2	472.271
	POAG-Rep-2	4017.07	69366	553	80	74.55		DLGEENFK	36	8	0	0.88	2	467.218
	POAG-Rep-2	4017.07	69366	553	80	74.55	Carbamidomethyl+C(1);Carbamidomethyl+C(2);Carbamidomethyl+C(10)	CCAAADPHECYAK	383	13	0	2.35	3	512.198
	POAG-Rep-2	4017.07	69366	553	80	74.55		LDELRDEGK	205	9	0	1.17	3	352.844
	POAG-Rep-2	4017.07	69366	553	80	74.55	Carbamidomethyl+C(14)	ALVLIAFAQYLQQCPFEDHVK	44	21	0	4.7	4	619.064
	POAG-Rep-2	4017.07	69366	553	80	74.55		SLHTLFGDK	88	9	0	1.17	3	333.842
	POAG-Rep-2	4017.07	69366	553	80	74.55		VFDEFKPLVEEPQNLIK	396	17	0	3.52	3	676.69
	POAG-Rep-2	4017.07	69366	553	80	74.55		HPYFYAPELLFFAK	169	14	0	2.64	3	575.627
	POAG-Rep-4	3558.37	69366	509	72	70.61		LVNEVTEFAK	65	10	17	112.29	2	575.312
	POAG-Rep-4	3558.37	69366	509	72	70.61		FQNALLVR	426	8	14	83.74	2	480.783
	POAG-Rep-4	3558.37	69366	509	72	70.61		QTALVELVK	549	9	19	82.78	2	500.803
	POAG-Rep-4	3558.37	69366	509	72	70.61		VFDEFKPLVEEPQNLIK	396	17	34	307.05	3	682.363
	POAG-Rep-4	3558.37	69366	509	72	70.61	Carbamidomethyl+C(4);Carbamidomethyl+C(5)	LKECCEKPLLEK	298	12	23	203.51	3	516.266
	POAG-Rep-4	3558.37	69366	509	72	70.61		TYETTLEK	375	8	12	83.74	2	492.745
	POAG-Rep-4	3558.37	69366	509	72	70.61	Carbamidomethyl+C(2)	LCTVATLR	97	8	10	83.74	2	467.265
	POAG-Rep-4	3558.37	69366	509	72	70.61	Carbamidomethyl+C(1);Carbamidomethyl+C(2)	CCTESLVNR	499	9	14	88.8	2	569.752
	POAG-Rep-4	3558.37	69366	509	72	70.61		LDELRDEGK	205	9	17	129.6	2	537.769
	POAG-Rep-4	3558.37	69366	509	72	70.61		AVMDDFAAFVEK	569	12	20	203.51	2	671.818
	POAG-Rep-4	3558.37	69366	509	72	70.61	Carbamidomethyl+C(3)	RPCFSALEVDETYVPK	508	16	31	305.16	3	637.641
	POAG-Rep-4	3558.37	69366	509	72	70.61	Carbamidomethyl+C(6);Carbamidomethyl+C(7)	AAFTECCQAADK	186	12	21	169.53	2	686.282
	POAG-Rep-4	3558.37	69366	509	72	70.61	Carbamidomethyl+C(3)	QNCELFEQLGEYK	413	13	32	196.82	2	829.377
	POAG-Rep-4	3558.37	69366	509	72	70.61	Carbamidomethyl+C(3)	YICENQDSISSK	286	12	23	164.3	2	722.322
	POAG-Rep-4	3558.37	69366	509	72	70.61		SLHTLFGDK	88	9	9	66.42	2	509.267
	POAG-Rep-4	3558.37	69366	509	72	70.61	Carbamidomethyl+C(2);Carbamidomethyl+C(11)	TCVADESAENCDK	75	13	35	210.63	2	749.789
	POAG-Rep-4	3558.37	69366	509	72	70.61	Carbamidomethyl+C(14)	ALVLIAFAQYLQQCPFEDHVK	44	21	27	272.59	3	830.759
	POAG-Rep-4	3558.37	69366	509	72	70.61		DLGEENFK	36	8	12	69.13	2	476.222
	POAG-Rep-4	3558.37	69366	509	72	70.61		DDNPNLPR	130	8	6	44.7	2	470.728
	POAG-Rep-4	3558.37	69366	509	72	70.61	Carbamidomethyl+C(9);Carbamidomethyl+C(10)	ETYGEMADCCAK	105	12	18	140.32	2	717.767
	POAG-Rep-4	3558.37	69366	509	72	70.61	Carbamidomethyl+C(5);Carbamidomethyl+C(6);Carbamidomethyl+C(13)	VHTECCHGDLLECADDR	264	17	15	106.41	3	696.282
	POAG-Rep-4	3558.37	69366	509	72	70.61	Carbamidomethyl+C(3)	NECFLQHKDDNPNLPR	122	16	20	106.24	3	666.31
	POAG-Rep-4	3558.37	69366	509	72	70.61	Carbamidomethyl+C(3)	SHCIAEVENDEMPADLPSLAADFVESK	310	27	23	190.02	3	992.116
	POAG-Rep-4	3558.37	69366	509	72	70.61	Carbamidomethyl+C(3);Carbamidomethyl+C(16)	MPCAEDYLSVVLNQLCVLHEK	469	21	10	63.68	3	840.071
	POAG-Rep-4	3558.37	69366	509	72	70.61	Carbamidomethyl+C(14)	EFNAETFTFHADICTLSEK	524	19	6	40.51	3	754.009
	POAG-Rep-4	3558.37	69366	509	72	70.61		HPYFYAPELLFFAK	169	14	11	84.55	3	581.629
	POAG-Rep-4	3558.37	69366	509	72	70.61	Carbamidomethyl+C(3)	NECFLQHK	122	8	5	44.7	2	538.253
	POAG-Rep-4	3558.37	69366	509	72	70.61	Carbamidomethyl+C(14)	EFNAETFTFHADICTLSEKER	524	21	8	47.35	4	637.04
	POAG-Rep-4	3558.37	69366	509	72	70.61		VPQVSTPTLVEVSR	438	14	7	69.49	2	756.424
	POAG-Rep-4	3558.37	69366	509	72	70.61		LVTDLTK	257	7	6	41.39	2	395.235
	POAG-Rep-4	3558.37	69366	509	72	70.61		YLYEIAR	161	7	3	44.4	2	464.247
	POAG-Rep-4	3558.37	69366	509	72	70.61	Carbamidomethyl+C(3)	ETCFAEEGKK	588	10	5	56.88	2	599.774
	POAG-Rep-4	3558.37	69366	509	72	70.61	Carbamidomethyl+C(1);Carbamidomethyl+C(2);Carbamidomethyl+C(10)	CCAAADPHECYAK	383	13	20	228.24	3	518.198
	POAG-Rep-4	3558.37	69366	509	72	70.61		AEFAEVSK	249	8	11	103.11	2	440.719
	POAG-Rep-4	3558.37	69366	509	72	70.61	Carbamidomethyl+C(10)	LVRPEVDVMCTAFHDNEETFLK	138	22	14	157.86	4	663.311
	POAG-Rep-4	3558.37	69366	509	72	70.61		AWAVAR	236	6	3	47.12	1	673.372
	POAG-Rep-4	3558.37	69366	509	72	70.61	Carbamidomethyl+C(3)	AACLLPK	198	7	5	73.61	1	772.43
	POAG-Rep-4	3558.37	69366	509	72	70.61		KVPQVSTPTLVEVSR	437	15	21	186.62	2	820.473
	POAG-Rep-4	3558.37	69366	509	72	70.61		KQTALVELVK	548	10	14	165.13	2	564.85
	POAG-Rep-4	3558.37	69366	509	72	70.61	Carbamidomethyl+C(11)	SLHTLFGDKLCTVATLR	88	17	16	153.36	3	644.677
	POAG-Rep-4	3558.37	69366	509	72	70.61		LDELRDEGK	205	9	5	68.18	2	537.77
	POAG-Rep-4	3558.37	69366	509	72	70.61	Oxidation+M(12)	NYAEAKDVFLGMFLYEYAR	341	19	5	17.57	4	579.776
	POAG-Rep-4	3558.37	69366	509	72	70.61		ELRDEGK	207	7	8	59.6	2	423.714
	POAG-Rep-4	3558.37	69366	509	72	70.61		HTLFGDK	90	7	0	1.18	2	409.21
	POAG-Rep-4	3558.37	69366	509	72	70.61		PELLFFAK	175	8	0	2.66	2	482.776
	POAG-Rep-4	3558.37	69366	509	72	70.61		NEVTEFAK	67	8	3	22.9	1	937.461
	POAG-Rep-4	3558.37	69366	509	72	70.61		DETYVPK	517	7	5	37.52	1	851.408
	POAG-Rep-4	3558.37	69366	509	72	70.61	Carbamidomethyl+C(12)	VLIAFAQYLQQCPFEDHVK	46	19	2	13.73	3	769.388
	POAG-Rep-4	3558.37	69366	509	72	70.61	Carbamidomethyl+C(2)	ECFLQHKDDNPNLPR	123	15	1	7.44	3	628.297
	POAG-Rep-4	3558.37	69366	509	72	70.61	Carbamidomethyl+C(1)	CTVATLR	98	7	2	10.72	2	410.717
	POAG-Rep-4	3558.37	69366	509	72	70.61		EVDETYVPK	515	9	0	3.25	2	540.265
	POAG-Rep-4	3558.37	69366	509	72	70.61		DEFKPLVEEPQNLIK	398	15	4	37.95	2	899.989
	POAG-Rep-4	3558.37	69366	509	72	70.61	Carbamidomethyl+C(5)	YLQQCPFEDHVK	53	12	1	7.3	2	782.368
	POAG-Rep-4	3558.37	69366	509	72	70.61	Carbamidomethyl+C(1)	CFAEEGKK	590	8	0	1.48	2	484.731
	POAG-Rep-4	3558.37	69366	509	72	70.61	Carbamidomethyl+C(3)	QQCPFEDHVK	55	10	2	7.3	2	644.296
	POAG-Rep-4	3558.37	69366	509	72	70.61	Carbamidomethyl+C(4)	LQQCPFEDHVK	54	11	2	13.73	2	700.835
	POAG-Rep-4	3558.37	69366	509	72	70.61	Carbamidomethyl+C(9)	AFAQYLQQCPFEDHVK	49	16	3	25.94	3	660.98
	POAG-Rep-4	3558.37	69366	509	72	70.61		MDDFAAFVEK	571	10	2	19.52	2	586.771
	POAG-Rep-4	3558.37	69366	509	72	70.61	Carbamidomethyl+C(11)	LIAFAQYLQQCPFEDHVK	47	18	3	25.94	3	736.365
	POAG-Rep-4	3558.37	69366	509	72	70.61	Carbamidomethyl+C(10)	IAFAQYLQQCPFEDHVK	48	17	2	13.73	3	698.678
	POAG-Rep-4	3558.37	69366	509	72	70.61		ALVELVK	551	7	0	1.18	1	771.492
	POAG-Rep-4	3558.37	69366	509	72	70.61		QNALLVR	427	7	1	10.72	2	407.248
	POAG-Rep-4	3558.37	69366	509	72	70.61		QTALVELVK	549	9	0	1.18	2	491.796
	POAG-Rep-4	3558.37	69366	509	72	70.61		DDNPNLPR	130	8	0	0.89	2	462.213
	POAG-Rep-4	3558.37	69366	509	72	70.61	Carbamidomethyl+C(2)	LCTVATLR	97	8	0	0.89	2	458.254
	POAG-Rep-4	3558.37	69366	509	72	70.61	Carbamidomethyl+C(3)	RPCFSALEVDETYVPK	508	16	0	3.25	3	631.64
	POAG-Rep-4	3558.37	69366	509	72	70.61		TYETTLEK	375	8	0	0.89	2	483.743
	POAG-Rep-4	3558.37	69366	509	72	70.61		FQNALLVR	426	8	0	0.89	2	472.275
	POAG-Rep-4	3558.37	69366	509	72	70.61		DLGEENFK	36	8	0	0.89	2	467.216
	POAG-Rep-4	3558.37	69366	509	72	70.61	Carbamidomethyl+C(14)	EFNAETFTFHADICTLSEKER	524	21	0	4.73	4	632.541
	POAG-Rep-4	3558.37	69366	509	72	70.61		VFDEFKPLVEEPQNLIK	396	17	0	3.55	3	676.69
	POAG-Rep-4	3558.37	69366	509	72	70.61		LVTDLTK	257	7	0	0.59	2	386.229
sp|P04083|ANXA1_HUMAN Annexin A1 OS=Homo sapiens GN=ANXA1 PE=1 SV=2	CTRL-Rep-1	270.35	38714	31	5	18.21		TPAQFDADELR	113	11	7	66.41	2	631.808
	CTRL-Rep-1	270.35	38714	31	5	18.21		NALLSLAK	177	8	5	44.85	2	415.257
	CTRL-Rep-1	270.35	38714	31	5	18.21		GLGTDEDTLIEILASR	128	16	8	57.06	2	851.945
	CTRL-Rep-1	270.35	38714	31	5	18.21		DITSDTSGDFR	166	11	8	94.36	2	607.273
	CTRL-Rep-1	270.35	38714	31	5	18.21		QAWFIENEEQEYVQTVK	9	17	3	19.29	4	536.018
	CTRL-Rep-3	209.98	38714	37	9	30.35		ALYEAGER	204	8	5	44.42	2	454.726
	CTRL-Rep-3	209.98	38714	37	9	30.35		GGPGSAVSPYPTFNPSSDVAALHK	29	24	5	28.1	3	786.056
	CTRL-Rep-3	209.98	38714	37	9	30.35		GLGTDEDTLIEILASR	128	16	8	59.73	2	851.948
	CTRL-Rep-3	209.98	38714	37	9	30.35		GVDEATIIDILTKR	58	14	4	45.97	3	515.288
	CTRL-Rep-3	209.98	38714	37	9	30.35		SEIDMNDIK	303	9	6	33.93	2	532.747
	CTRL-Rep-3	209.98	38714	37	9	30.35		NALLSLAK	177	8	3	44.42	2	415.255
	CTRL-Rep-3	209.98	38714	37	9	30.35		TPAQFDADELR	113	11	4	30.56	3	421.538
	CTRL-Rep-3	209.98	38714	37	9	30.35		DLAKDITSDTSGDFR	162	15	7	33.56	3	547.593
	CTRL-Rep-3	209.98	38714	37	9	30.35		GVDEATIIDILTK	58	13	0	2.72	2	694.389
	CTRL-Rep-4	297.21	38714	36	8	27.75		TPAQFDADELR	113	11	6	61.52	2	631.807
	CTRL-Rep-4	297.21	38714	36	8	27.75		GLGTDEDTLIEILASR	128	16	10	56.04	2	851.946
	CTRL-Rep-4	297.21	38714	36	8	27.75		NALLSLAK	177	8	6	58.71	2	415.256
	CTRL-Rep-4	297.21	38714	36	8	27.75		GGPGSAVSPYPTFNPSSDVAALHK	29	24	3	23.82	3	786.058
	CTRL-Rep-4	297.21	38714	36	8	27.75		DITSDTSGDFR	166	11	5	41.05	2	607.269
	CTRL-Rep-4	297.21	38714	36	8	27.75		GVDEATIIDILTKR	58	14	4	35.56	3	515.289
	CTRL-Rep-4	297.21	38714	36	8	27.75	Carbamidomethyl+C(1)	CATSKPAFFAEK	269	12	3	25.27	3	452.885
	CTRL-Rep-4	297.21	38714	36	8	27.75		DEATIIDILTKR	60	12	0	2.76	2	694.394
	POAG-Rep-2	203.11	38714	44	12	29.77		TPAQFDADELR	113	11	3	39.66	2	631.805
	POAG-Rep-2	203.11	38714	44	12	29.77		ALTGHLEEVVLALLK	98	15	5	29.37	3	535.985
	POAG-Rep-2	203.11	38714	44	12	29.77		GLGTDEDTLIEILASR	128	16	9	68.68	2	851.947
	POAG-Rep-2	203.11	38714	44	12	29.77		DITSDTSGDFR	166	11	4	30.91	2	607.271
	POAG-Rep-2	203.11	38714	44	12	29.77		SEDFGVNEDLADSDAR	188	16	4	20.2	2	870.372
	POAG-Rep-2	203.11	38714	44	12	29.77		AAYLQETGKPLDETLK	81	16	4	26.73	3	592.99
	POAG-Rep-2	203.11	38714	44	12	29.77		NALLSLAK	177	8	3	44.8	2	415.254
	POAG-Rep-2	203.11	38714	44	12	29.77		TPAQFDADELRAAMK	113	15	3	21.29	3	555.278
	POAG-Rep-2	203.11	38714	44	12	29.77		GDRSEDFGVNEDLADSDAR	185	19	3	24.6	3	689.965
	POAG-Rep-2	203.11	38714	44	12	29.77		GLGTDEDTLIEILASRTNK	128	19	5	25.42	3	682.697
	POAG-Rep-2	203.11	38714	44	12	29.77	Phosphoryl STY(12)	GGPGSAVSPYPTFNPSSDVAALHK	29	24	3	25.15	4	609.787
	POAG-Rep-2	203.11	38714	44	12	29.77		ALTGHLEEVVLALLK	98	15	0	2.93	3	529.987
	POAG-Rep-4	264.36	38714	46	10	32.95		TPAQFDADELR	113	11	5	39.57	2	631.806
	POAG-Rep-4	264.36	38714	46	10	32.95		NALLSLAK	177	8	7	54.53	2	415.258
	POAG-Rep-4	264.36	38714	46	10	32.95		GLGTDEDTLIEILASR	128	16	11	88.8	2	851.945
	POAG-Rep-4	264.36	38714	46	10	32.95		DITSDTSGDFR	166	11	5	34.79	2	607.27
	POAG-Rep-4	264.36	38714	46	10	32.95		SEIDMNDIK	303	9	4	34.2	2	532.747
	POAG-Rep-4	264.36	38714	46	10	32.95		SEDFGVNEDLADSDAR	188	16	4	20.12	3	580.581
	POAG-Rep-4	264.36	38714	46	10	32.95		GGPGSAVSPYPTFNPSSDVAALHK	29	24	4	24.09	3	786.054
	POAG-Rep-4	264.36	38714	46	10	32.95		AAYLQETGKPLDETLK	81	16	3	26.65	3	592.981
	POAG-Rep-4	264.36	38714	46	10	32.95		GDRSEDFGVNEDLADSDAR	185	19	3	17.57	3	689.967
	POAG-Rep-4	264.36	38714	46	10	32.95	Phosphoryl STY(9)	GTDVNVFNTILTTR	214	14	4	22.46	3	544.264
sp|P07355|ANXA2_HUMAN Annexin A2 OS=Homo sapiens GN=ANXA2 PE=1 SV=2	CTRL-Rep-1	188.31	38604	20	6	25.07		SALSGHLETVILGLLK	88	16	3	26.78	3	550.991
	CTRL-Rep-1	188.31	38604	20	6	25.07		SLYYYIQQDTK	313	11	3	39.71	2	711.345
	CTRL-Rep-1	188.31	38604	20	6	25.07	Carbamidomethyl+C(13)	GDLENAFLNLVQCIQNKPLYFADR	249	24	5	55.62	3	946.809
	CTRL-Rep-1	188.31	38604	20	6	25.07		VLIR	286	4	1	14.37	1	500.359
	CTRL-Rep-1	188.31	38604	20	6	25.07		YKSYSPYDMLESIR	231	14	6	62.91	3	584.611
	CTRL-Rep-1	188.31	38604	20	6	25.07		TDLEKDIISDTSGDFR	152	16	4	20.24	3	604.629
	POAG-Rep-2	193	38604	47	13	45.72		SLYYYIQQDTK	313	11	4	39.66	2	711.351
	POAG-Rep-2	193	38604	47	13	45.72		AYTNFDAER	28	9	4	42.08	2	543.747
	POAG-Rep-2	193	38604	47	13	45.72	Carbamidomethyl+C(13)	GDLENAFLNLVQCIQNKPLYFADR	249	24	7	33.73	3	946.815
	POAG-Rep-2	193	38604	47	13	45.72		LSLEGDHSTPPSAYGSVK	10	18	3	27.32	3	615.634
	POAG-Rep-2	193	38604	47	13	45.72		SALSGHLETVILGLLK	88	16	7	68.01	3	550.991
	POAG-Rep-2	193	38604	47	13	45.72		TDLEK	152	5	1	14.64	1	605.309
	POAG-Rep-2	193	38604	47	13	45.72		GVDEVTIVNILTNR	49	14	3	30.33	2	771.92
	POAG-Rep-2	193	38604	47	13	45.72		LYDSMKGK	273	8	3	40.03	2	471.242
	POAG-Rep-2	193	38604	47	13	45.72		SYSPYDMLESIRK	233	13	3	24.01	3	530.263
	POAG-Rep-2	193	38604	47	13	45.72		RAEDGSVIDYELIDQDAR	178	18	3	27.32	3	688.996
	POAG-Rep-2	193	38604	47	13	45.72		SLYYYIQQDTKGDYQK	313	16	5	28.72	3	671.659
	POAG-Rep-2	193	38604	47	13	45.72		SNAQRQDIAFAYQR	63	14	3	30.33	3	556.617
	POAG-Rep-2	193	38604	47	13	45.72	Phosphoryl STY(11)	TDLEKDIISDTSGDFR	152	16	4	26.73	3	631.283
	POAG-Rep-4	187.96	38604	40	11	41.3		SALSGHLETVILGLLK	88	16	4	27.82	3	550.994
	POAG-Rep-4	187.96	38604	40	11	41.3	Carbamidomethyl+C(13)	GDLENAFLNLVQCIQNKPLYFADR	249	24	5	21.11	3	946.81
	POAG-Rep-4	187.96	38604	40	11	41.3		AEDGSVIDYELIDQDAR	179	17	5	46.4	2	954.95
	POAG-Rep-4	187.96	38604	40	11	41.3		LSLEGDHSTPPSAYGSVK	10	18	3	25.73	3	615.634
	POAG-Rep-4	187.96	38604	40	11	41.3		GVDEVTIVNILTNR	49	14	4	35.3	2	771.918
	POAG-Rep-4	187.96	38604	40	11	41.3	Carbamidomethyl+C(14)	GLGTDEDSLIEIICSR	119	16	3	20.12	2	889.437
	POAG-Rep-4	187.96	38604	40	11	41.3		LYDSMK	273	6	2	29.5	2	378.68
	POAG-Rep-4	187.96	38604	40	11	41.3		RAEDGSVIDYELIDQDAR	178	18	4	42.72	3	688.998
	POAG-Rep-4	187.96	38604	40	11	41.3		SNAQRQDIAFAYQR	63	14	3	30.24	3	556.607
	POAG-Rep-4	187.96	38604	40	11	41.3		YKSYSPYDMLESIR	231	14	6	44.98	3	584.611
	POAG-Rep-4	187.96	38604	40	11	41.3	Phosphoryl STY(7)	DALNIETAIK	37	10	3	30.52	2	584.288
sp|P02647|APOA1_HUMAN Apolipoprotein A-I OS=Homo sapiens GN=APOA1 PE=1 SV=1	CTRL-Rep-1	426.21	30777	64	18	48.31		VSFLSALEEYTK	250	12	7	52.9	2	693.866
	CTRL-Rep-1	426.21	30777	64	18	48.31		QGLLPVLESFK	239	11	7	43.4	2	615.856
	CTRL-Rep-1	426.21	30777	64	18	48.31		LLDNWDSVTSTFSK	69	14	8	54.62	2	806.898
	CTRL-Rep-1	426.21	30777	64	18	48.31		THLAPYSDELR	184	11	10	94.36	2	651.329
	CTRL-Rep-1	426.21	30777	64	18	48.31		VQPYLDDFQK	120	10	6	57.09	2	626.815
	CTRL-Rep-1	426.21	30777	64	18	48.31		LSPLGEEMR	164	9	5	50.77	2	516.263
	CTRL-Rep-1	426.21	30777	64	18	48.31		LSPLGEEMRDR	164	11	3	39.71	3	434.89
	CTRL-Rep-1	426.21	30777	64	18	48.31		LEALKENGGAR	201	11	5	34.94	2	579.313
	CTRL-Rep-1	426.21	30777	64	18	48.31		ATEHLSTLSEK	219	11	4	41.81	3	405.873
	CTRL-Rep-1	426.21	30777	64	18	48.31		EQLGPVTQEFWDNLEK	85	16	3	27.95	3	644.981
	CTRL-Rep-1	426.21	30777	64	18	48.31		ETEGLR	101	6	2	29.61	2	352.686
	CTRL-Rep-1	426.21	30777	64	18	48.31		DLATVYVDVLK	36	11	3	30.96	2	618.347
	CTRL-Rep-1	426.21	30777	64	18	48.31		ETEGLRQEMSK	101	11	3	30.96	2	654.324
	CTRL-Rep-1	426.21	30777	64	18	48.31		LLDNWDSVTST	69	11	0	2.63	2	625.802
	CTRL-Rep-1	426.21	30777	64	18	48.31		SPLGEEMRDR	165	10	0	1.75	2	595.282
	CTRL-Rep-1	426.21	30777	64	18	48.31		ALKENGGAR	203	9	0	1.75	2	458.25
	CTRL-Rep-1	426.21	30777	64	18	48.31		EALKENGGAR	202	10	0	1.75	2	522.774
	CTRL-Rep-1	426.21	30777	64	18	48.31		PLGEEMR	166	7	2	9.81	2	416.201
	CTRL-Rep-3	248.14	30777	37	12	38.2		QGLLPVLESFK	239	11	6	56.55	2	615.857
	CTRL-Rep-3	248.14	30777	37	12	38.2		LSPLGEEMR	164	9	3	41.71	2	516.264
	CTRL-Rep-3	248.14	30777	37	12	38.2		THLAPYSDELR	184	11	7	41.26	2	651.329
	CTRL-Rep-3	248.14	30777	37	12	38.2		LEALKENGGAR	201	11	3	30.56	2	579.316
	CTRL-Rep-3	248.14	30777	37	12	38.2		EQLGPVTQEFWDNLEKETEGLR	85	22	5	25.43	3	873.424
	CTRL-Rep-3	248.14	30777	37	12	38.2		DYVSQFEGSALGK	51	13	4	23.68	2	700.847
	CTRL-Rep-3	248.14	30777	37	12	38.2		ATEHLSTLSEK	219	11	3	39.31	3	405.872
	CTRL-Rep-3	248.14	30777	37	12	38.2		LLDNWDSVTSTFSK	69	14	5	50.77	3	538.259
	CTRL-Rep-3	248.14	30777	37	12	38.2		ETEGLR	101	6	1	14.81	2	352.686
	CTRL-Rep-3	248.14	30777	37	12	38.2		ALKENGGAR	203	9	0	1.82	2	458.251
	CTRL-Rep-3	248.14	30777	37	12	38.2		PLGEEMR	166	7	3	41.71	2	416.202
	CTRL-Rep-3	248.14	30777	37	12	38.2		EALKENGGAR	202	10	0	1.82	2	522.773
	CTRL-Rep-4	345.38	30777	51	13	40.82		VQPYLDDFQKK	120	11	7	70.74	3	460.905
	CTRL-Rep-4	345.38	30777	51	13	40.82		LLDNWDSVTSTFSK	69	14	7	12.57	2	806.898
	CTRL-Rep-4	345.38	30777	51	13	40.82		THLAPYSDELR	184	11	12	107.41	2	651.328
	CTRL-Rep-4	345.38	30777	51	13	40.82		VQPYLDDFQK	120	10	3	37.09	2	626.817
	CTRL-Rep-4	345.38	30777	51	13	40.82		LEALKENGGAR	201	11	5	53.28	2	579.316
	CTRL-Rep-4	345.38	30777	51	13	40.82		ATEHLSTLSEK	219	11	6	76.48	3	405.873
	CTRL-Rep-4	345.38	30777	51	13	40.82		EQLGPVTQEFWDNLEK	85	16	4	19.77	3	644.98
	CTRL-Rep-4	345.38	30777	51	13	40.82		LEALK	201	5	1	14.45	1	573.356
	CTRL-Rep-4	345.38	30777	51	13	40.82		LSPLGEEMR	164	9	4	41.56	2	516.27
	CTRL-Rep-4	345.38	30777	51	13	40.82		DYVSQFEGSALGK	51	13	3	31.02	2	700.834
	CTRL-Rep-4	345.38	30777	51	13	40.82		VEPLRAELQEGAR	142	13	3	32.78	3	489.933
	CTRL-Rep-4	345.38	30777	51	13	40.82		PYLDDFQKK	122	9	1	8.5	2	577.296
	CTRL-Rep-4	345.38	30777	51	13	40.82		ALKENGGAR	203	9	0	1.84	2	458.252
	POAG-Rep-1	338.47	30777	45	10	31.09		QGLLPVLESFK	239	11	5	43.69	2	615.856
	POAG-Rep-1	338.47	30777	45	10	31.09		THLAPYSDELR	184	11	11	123.59	2	651.331
	POAG-Rep-1	338.47	30777	45	10	31.09		LSPLGEEMR	164	9	6	68.83	2	516.264
	POAG-Rep-1	338.47	30777	45	10	31.09		LREQLGPVTQEFWDNLEK	83	18	4	31.13	3	734.708
	POAG-Rep-1	338.47	30777	45	10	31.09		AELQEGAR	147	8	6	45.08	2	437.222
	POAG-Rep-1	338.47	30777	45	10	31.09		ATEHLSTLSEK	219	11	4	46.88	3	405.872
	POAG-Rep-1	338.47	30777	45	10	31.09		WQEEMELYR	131	9	4	34.57	2	642.296
	POAG-Rep-1	338.47	30777	45	10	31.09		EQLGPVTQEFWDNLEK	85	16	6	41.08	3	644.985
	POAG-Rep-1	338.47	30777	45	10	31.09		DLEEVK	112	6	2	29.77	2	366.691
	POAG-Rep-1	338.47	30777	45	10	31.09		PLGEEMR	166	7	1	9.87	2	416.202
	POAG-Rep-2	302.27	30777	47	13	41.57		LLDNWDSVTSTFSK	69	14	8	45.13	2	806.9
	POAG-Rep-2	302.27	30777	47	13	41.57		THLAPYSDELR	184	11	9	93.44	2	651.329
	POAG-Rep-2	302.27	30777	47	13	41.57		LSPLGEEMR	164	9	5	42.08	2	516.263
	POAG-Rep-2	302.27	30777	47	13	41.57		EQLGPVTQEFWDNLEK	85	16	7	20.2	3	644.987
	POAG-Rep-2	302.27	30777	47	13	41.57		VQPYLDDFQK	120	10	5	40.61	2	626.813
	POAG-Rep-2	302.27	30777	47	13	41.57		DSGRDYVSQFEGSALGK	47	17	3	19.24	2	908.434
	POAG-Rep-2	302.27	30777	47	13	41.57		DYVSQFEGSALGK	51	13	3	24.01	2	700.846
	POAG-Rep-2	302.27	30777	47	13	41.57		ATEHLSTLSEK	219	11	3	39.66	3	405.872
	POAG-Rep-2	302.27	30777	47	13	41.57		VSFLSALEEYTK	250	12	4	25.76	3	462.912
	POAG-Rep-2	302.27	30777	47	13	41.57		QEMSKDLEEVK	107	11	3	27.9	2	668.334
	POAG-Rep-2	302.27	30777	47	13	41.57		DNWDSVTSTFSK	71	12	2	17.45	2	693.811
	POAG-Rep-2	302.27	30777	47	13	41.57		LLDNWDSVTST	69	11	0	2.64	2	625.805
	POAG-Rep-2	302.27	30777	47	13	41.57		PLGEEMR	166	7	0	1.17	2	416.201
sp|Q9NZN5|ARHGC_HUMAN Rho guanine nucleotide exchange factor 12 OS=Homo sapiens GN=ARHGEF12 PE=1 SV=1	POAG-Rep-4	324.25	173232	44	13	10.23		VSVPDEMSADLEKR	437	14	6	37.57	2	788.395
	POAG-Rep-4	324.25	173232	44	13	10.23		GFPSILGPPR	595	10	6	46.09	1	1040.59
	POAG-Rep-4	324.25	173232	44	13	10.23		EEQHGISVTGLQSPDR	1163	16	5	20.12	3	584.951
	POAG-Rep-4	324.25	173232	44	13	10.23		ATGSAQDGAVVTPSRPLGDTLTVSEAETDPGDVLGR	255	36	5	11.68	4	885.685
	POAG-Rep-4	324.25	173232	44	13	10.23	Carbamidomethyl+C(9)	VEESYTILCQR	1519	11	5	34.79	2	699.342
	POAG-Rep-4	324.25	173232	44	13	10.23		VSVPDEMSADLEK	437	13	4	38.4	2	710.325
	POAG-Rep-4	324.25	173232	44	13	10.23		DLGLESTLISSKPQSHSLSTSGK	1179	23	5	21.07	4	593.807
	POAG-Rep-4	324.25	173232	44	13	10.23	Carbamidomethyl+C(1)	CHSK	1060	4	1	14.31	1	531.238
	POAG-Rep-4	324.25	173232	44	13	10.23		LVLR	1056	4	1	14.31	1	500.35
	POAG-Rep-4	324.25	173232	44	13	10.23	Carbamidomethyl+C(14)	FQTFVQDAESNPLCR	907	15	5	29.29	3	604.625
	POAG-Rep-4	324.25	173232	44	13	10.23		RNETSVIDQIGEDLLTWFSGPGEEK	854	25	3	14.39	6	470.896
	POAG-Rep-4	324.25	173232	44	13	10.23	Phosphoryl STY(2)	VSVPDEMSADLEKR	437	14	3	22.46	3	552.574
	POAG-Rep-4	324.25	173232	44	13	10.23	Oxidation+M(9)	AYHSGEGHMPFR	1304	12	5	60.32	3	468.879
sp|P61769|B2MG_HUMAN Beta-2-microglobulin OS=Homo sapiens GN=B2M PE=1 SV=1	CTRL-Rep-1	163.62	13714	26	6	40.34	Carbamidomethyl+C(6)	SNFLNCYVSGFHPSDIEVDLLK	39	22	17	108.98	3	852.078
	CTRL-Rep-1	163.62	13714	26	6	40.34		VNHVTLSQPK	101	10	8	59.19	2	561.817
	CTRL-Rep-1	163.62	13714	26	6	40.34		VEHSDLSFSK	68	10	3	32.43	3	383.518
	CTRL-Rep-1	163.62	13714	26	6	40.34		IQVYSR	26	6	3	29.61	2	383.213
	CTRL-Rep-1	163.62	13714	26	6	40.34	Carbamidomethyl+C(6)	SNFLNCYVSGF	39	11	0	4.97	2	654.295
	CTRL-Rep-1	163.62	13714	26	6	40.34		VNHVTLSQPK	101	10	0	1.46	3	369.206
	CTRL-Rep-3	182.15	13714	32	6	59.66	Carbamidomethyl+C(6)	SNFLNCYVSGFHPSDIEVDLLK	39	22	15	118.91	3	852.077
	CTRL-Rep-3	182.15	13714	32	6	59.66		VNHVTLSQPK	101	10	9	45.73	2	561.816
	CTRL-Rep-3	182.15	13714	32	6	59.66	Carbamidomethyl+C(22)	DWSFYLLYYTEFTPTEKDEYACR	78	23	5	23.43	3	999.783
	CTRL-Rep-3	182.15	13714	32	6	59.66		VEHSDLSFSK	68	10	3	30.25	2	574.78
	CTRL-Rep-3	182.15	13714	32	6	59.66		IQVYSR	26	6	3	29.31	2	383.213
	CTRL-Rep-3	182.15	13714	32	6	59.66		VNHVTLSQPK	101	10	0	1.51	3	369.203
	CTRL-Rep-4	286.57	13714	36	6	40.34	Carbamidomethyl+C(6)	SNFLNCYVSGFHPSDIEVDLLK	39	22	21	146.34	3	852.076
	CTRL-Rep-4	286.57	13714	36	6	40.34		VNHVTLSQPK	101	10	9	65.99	2	561.817
	CTRL-Rep-4	286.57	13714	36	6	40.34		VEHSDLSFSK	68	10	11	81.22	2	574.783
	CTRL-Rep-4	286.57	13714	36	6	40.34		IQVYSR	26	6	2	29.2	2	383.212
	CTRL-Rep-4	286.57	13714	36	6	40.34		EHSDLSFSK	69	9	1	8.99	2	525.253
	CTRL-Rep-4	286.57	13714	36	6	40.34		VNHVTLSQPK	101	10	0	1.53	3	369.206
	POAG-Rep-1	225.24	13714	29	4	31.93	Carbamidomethyl+C(6)	SNFLNCYVSGFHPSDIEVDLLK	39	22	19	124.17	3	852.077
	POAG-Rep-1	225.24	13714	29	4	31.93		VNHVTLSQPK	101	10	10	104.61	2	561.817
	POAG-Rep-1	225.24	13714	29	4	31.93		IQVYSR	26	6	5	44.51	2	383.212
	POAG-Rep-1	225.24	13714	29	4	31.93		VNHVTLSQPK	101	10	0	1.43	3	368.873
	POAG-Rep-2	263.54	13714	35	6	54.62	Carbamidomethyl+C(6)	SNFLNCYVSGFHPSDIEVDLLK	39	22	19	135.39	3	852.079
	POAG-Rep-2	263.54	13714	35	6	54.62		VNHVTLSQPK	101	10	8	66.88	2	561.817
	POAG-Rep-2	263.54	13714	35	6	54.62		VEHSDLSFSK	68	10	7	67.67	2	574.785
	POAG-Rep-2	263.54	13714	35	6	54.62		IQVYSR	26	6	2	29.57	2	383.212
	POAG-Rep-2	263.54	13714	35	6	54.62		DWSFYLLYYTEFTPTEK	78	17	3	27.9	4	551.503
	POAG-Rep-2	263.54	13714	35	6	54.62		EHSDLSFSK	69	9	1	9.12	2	525.252
	POAG-Rep-4	265.49	13714	29	5	35.29	Carbamidomethyl+C(6)	SNFLNCYVSGFHPSDIEVDLLK	39	22	18	138.99	3	852.077
	POAG-Rep-4	265.49	13714	29	5	35.29		VNHVTLSQPK	101	10	10	89.1	2	561.814
	POAG-Rep-4	265.49	13714	29	5	35.29		VEHSDLSFSK	68	10	7	48.13	2	574.784
	POAG-Rep-4	265.49	13714	29	5	35.29		EHSDLSFSK	69	9	0	1.48	2	525.253
	POAG-Rep-4	265.49	13714	29	5	35.29		VEHSDLSFSK	68	10	0	1.48	3	377.517
sp|Q8NDD1|CA131_HUMAN Uncharacterized protein C1orf131 OS=Homo sapiens GN=C1orf131 PE=1 SV=3	CTRL-Rep-1	85.05	32766	7	2	7.82		EQVEVVEFHSNK	125	12	5	39.22	3	482.235
	CTRL-Rep-1	85.05	32766	7	2	7.82		DVDTQEFNLEK	159	11	3	30.96	2	669.32
sp|P62158|CALM_HUMAN Calmodulin OS=Homo sapiens GN=CALM1 PE=1 SV=2	POAG-Rep-4	137.42	16837	23	6	30.87		VFDKDGNGYISAAELR	91	16	6	20.12	3	585.627
	POAG-Rep-4	137.42	16837	23	6	30.87		EAFSLFDKDGDGTITTK	14	17	6	54.31	3	615.63
	POAG-Rep-4	137.42	16837	23	6	30.87		ADQLTEEQIAEFK	1	13	4	23.92	3	507.916
	POAG-Rep-4	137.42	16837	23	6	30.87		EAFSLFDKDGDGTITTK	14	17	3	19.17	3	615.635
	POAG-Rep-4	137.42	16837	23	6	30.87	Phosphoryl STY(13)	DGDGTITTKELGTVMR	22	16	6	47.7	2	887.408
	POAG-Rep-4	137.42	16837	23	6	30.87		EAFSLFDKDGDGTITTK	14	17	0	3.55	3	609.625
sp|P49662|CASP4_HUMAN Caspase-4 OS=Homo sapiens GN=CASP4 PE=1 SV=1	CTRL-Rep-3	95.98	43262	14	4	17.24	Carbamidomethyl+C(11)	THVEKDFIAFCSSTPHNVSWR	293	21	4	25.2	5	504.44
	CTRL-Rep-3	95.98	43262	14	4	17.24		DSPASLEVASSQSSENLEEDAVYK	269	24	3	23.92	3	852.402
	CTRL-Rep-3	95.98	43262	14	4	17.24		AHPNMEAGPPESGESTDALK	87	20	3	16.7	2	1019.48
	CTRL-Rep-3	95.98	43262	14	4	17.24	Oxidation+M(5)	AHPNMEAGPPESGESTDALK	87	20	5	41.35	3	685.309
sp|Q96M91|CCD11_HUMAN Coiled-coil domain-containing protein 11 OS=Homo sapiens GN=CCDC11 PE=2 SV=2	CTRL-Rep-4	217.1	61834	37	12	18.48		DAVQGFIINIEER	84	13	13	62.9	2	752.395
	CTRL-Rep-4	217.1	61834	37	12	18.48		ALQDLQEEADK	316	11	5	39.63	2	630.316
	CTRL-Rep-4	217.1	61834	37	12	18.48		QDFVAEK	145	7	7	55.39	2	418.713
	CTRL-Rep-4	217.1	61834	37	12	18.48		LVQR	312	4	2	14.14	1	515.327
	CTRL-Rep-4	217.1	61834	37	12	18.48		LAQEYR	442	6	4	29.2	2	390.203
	CTRL-Rep-4	217.1	61834	37	12	18.48		LDQQFR	152	6	2	14.75	1	806.417
	CTRL-Rep-4	217.1	61834	37	12	18.48	Carbamidomethyl+C(2)	ACPSK	506	5	1	14.45	1	562.269
	CTRL-Rep-4	217.1	61834	37	12	18.48	Carbamidomethyl+C(1)	CEELR	160	5	1	14.45	1	706.314
	CTRL-Rep-4	217.1	61834	37	12	18.48		ALQDLQEEADKK	316	12	3	29.25	3	463.237
	CTRL-Rep-4	217.1	61834	37	12	18.48	Carbamidomethyl+C(12)	EFEAGVAANKMCLDK	471	15	7	49.86	2	841.899
	CTRL-Rep-4	217.1	61834	37	12	18.48		EAKEQEER	407	8	3	39.49	2	509.742
	CTRL-Rep-4	217.1	61834	37	12	18.48	Carbamidomethyl+C(11)	HINESLKELNCEEK	420	14	4	22.09	3	581.621
sp|Q0P6D6|CCD15_HUMAN Coiled-coil domain-containing protein 15 OS=Homo sapiens GN=CCDC15 PE=2 SV=2	POAG-Rep-4	275.81	110484	31	10	7.89		GSVFPDDGRK	194	10	6	56.88	3	359.846
	POAG-Rep-4	275.81	110484	31	10	7.89		NQQPASFMR	675	9	6	34.2	2	539.754
	POAG-Rep-4	275.81	110484	31	10	7.89		GKEDLFGR	271	8	4	36.92	2	461.24
	POAG-Rep-4	275.81	110484	31	10	7.89	Carbamidomethyl+C(5)	REQECYAAEQR	808	11	4	40.19	3	480.546
	POAG-Rep-4	275.81	110484	31	10	7.89		WEIAR	725	5	1	14.6	1	674.361
	POAG-Rep-4	275.81	110484	31	10	7.89		EQLR	70	4	1	14.31	1	545.309
	POAG-Rep-4	275.81	110484	31	10	7.89		VHFK	637	4	1	14.31	1	530.306
	POAG-Rep-4	275.81	110484	31	10	7.89		VAIHNFASAHR	934	11	4	34.79	2	611.826
	POAG-Rep-4	275.81	110484	31	10	7.89		GQQDQQAIHSEDK	279	13	3	28.7	3	495.237
	POAG-Rep-4	275.81	110484	31	10	7.89	Oxidation+M(5)	MLGSMARK	0	8	3	39.93	2	455.235
sp|Q5M9N0|CD158_HUMAN Coiled-coil domain-containing protein 158 OS=Homo sapiens GN=CCDC158 PE=2 SV=2	CTRL-Rep-3	298.84	127140	53	17	17.97		SPVHSLLTSSVEGSIGSTSQYR	1018	22	5	24.27	4	573.794
	CTRL-Rep-3	298.84	127140	53	17	17.97		SILVDFEEASGKK	190	13	6	32.92	2	711.884
	CTRL-Rep-3	298.84	127140	53	17	17.97		MTLESSER	488	8	4	36.64	1	952.432
	CTRL-Rep-3	298.84	127140	53	17	17.97		NTLK	712	4	2	28.71	1	475.287
	CTRL-Rep-3	298.84	127140	53	17	17.97		DSTEGSK	963	7	4	44.12	1	723.325
	CTRL-Rep-3	298.84	127140	53	17	17.97		ASSAR	286	5	1	14.5	1	491.259
	CTRL-Rep-3	298.84	127140	53	17	17.97		AQLEK	592	5	1	14.5	1	588.336
	CTRL-Rep-3	298.84	127140	53	17	17.97		LQMTEK	554	6	1	14.81	2	375.197
	CTRL-Rep-3	298.84	127140	53	17	17.97		ELQGPGYTSNSSLKPR	846	16	3	28.27	3	578.623
	CTRL-Rep-3	298.84	127140	53	17	17.97		TISDLTTSLQEK	496	12	11	70.57	2	668.351
	CTRL-Rep-3	298.84	127140	53	17	17.97		VTNMEVALDK	805	10	4	30.25	2	560.288
	CTRL-Rep-3	298.84	127140	53	17	17.97		TEEDGRTSLGALEDR	925	15	4	35.94	3	550.266
	CTRL-Rep-3	298.84	127140	53	17	17.97		NSASRSFNSSPK	1005	12	4	35.63	3	427.876
	CTRL-Rep-3	298.84	127140	53	17	17.97		IFPVEDQLEALKSESQNK	239	18	3	18.11	3	692.36
	CTRL-Rep-3	298.84	127140	53	17	17.97	Carbamidomethyl+C(13)	NEGDHLRNVQTECEALK	537	17	4	26.35	4	503.993
	CTRL-Rep-3	298.84	127140	53	17	17.97		ELDNRNMEVQR	419	11	3	30.56	2	702.337
	CTRL-Rep-3	298.84	127140	53	17	17.97		TERDQFSQESGNLDDQLQK	362	19	3	17.37	3	746.686
sp|P10909|CLUS_HUMAN Clusterin OS=Homo sapiens GN=CLU PE=1 SV=1	POAG-Rep-2	174.75	52494	25	7	21.83		VTTVASHTSDSDVPSGVTEVVVK	385	23	6	27.48	3	772.056
	POAG-Rep-2	174.75	52494	25	7	21.83		LFDSDPITVTVPVEVSR	408	17	5	38.06	2	937.498
	POAG-Rep-2	174.75	52494	25	7	21.83	Carbamidomethyl+C(7)	EILSVDCSTNNPSQAK	306	16	3	26.73	2	881.918
	POAG-Rep-2	174.75	52494	25	7	21.83		QQTHMLDVMQDHFSR	167	15	5	30.36	3	624.957
	POAG-Rep-2	174.75	52494	25	7	21.83		ALQEYR	437	6	2	14.93	2	390.204
	POAG-Rep-2	174.75	52494	25	7	21.83		IDSLLENDR	158	9	4	34.3	2	537.772
	POAG-Rep-2	174.75	52494	25	7	21.83		RELDESLQVAER	324	12	4	35.97	3	482.251
	POAG-Rep-4	186.03	52494	29	8	21.38	Carbamidomethyl+C(7)	EILSVDCSTNNPSQAK	306	16	8	65.31	2	881.918
	POAG-Rep-4	186.03	52494	29	8	21.38		LFDSDPITVTVPVEVSR	408	17	3	19.17	2	937.497
	POAG-Rep-4	186.03	52494	29	8	21.38		ASSIIDELFQDR	182	12	3	25.67	3	465.233
	POAG-Rep-4	186.03	52494	29	8	21.38		VTTVASHTSDSDVPSGVTEVVVK	385	23	6	59.85	3	772.058
	POAG-Rep-4	186.03	52494	29	8	21.38		ALQEYR	437	6	3	29.5	2	390.203
	POAG-Rep-4	186.03	52494	29	8	21.38		IDSLLENDR	158	9	5	50.06	2	537.772
	POAG-Rep-4	186.03	52494	29	8	21.38		SYQWK	346	5	1	14.6	2	356.177
	POAG-Rep-4	186.03	52494	29	8	21.38		EDALNETR	81	8	3	44.7	2	474.224
sp|P01024|CO3_HUMAN Complement C3 OS=Homo sapiens GN=C3 PE=1 SV=2	CTRL-Rep-1	433.47	187148	85	25	19.18		LESEETMVLEAHDAQGDVPVTVTVHDFPGK	35	30	8	19.48	4	813.399
	CTRL-Rep-1	433.47	187148	85	25	19.18		TGLQEVEVK	904	9	4	34.35	2	501.774
	CTRL-Rep-1	433.47	187148	85	25	19.18	Carbamidomethyl+C(2)	ACEPGVDYVYK	1535	11	4	30.96	2	650.802
	CTRL-Rep-1	433.47	187148	85	25	19.18		VHQYFNVELIQPGAVK	1462	16	4	20.24	3	614.662
	CTRL-Rep-1	433.47	187148	85	25	19.18		LSINTHPSQKPLSITVR	408	17	5	26.69	3	631.027
	CTRL-Rep-1	433.47	187148	85	25	19.18		TMQALPYSTVGNSNNYLHLSVLR	439	23	4	15.35	3	860.105
	CTRL-Rep-1	433.47	187148	85	25	19.18		AGDFLEANYMNLQR	1171	14	6	68.33	2	821.391
	CTRL-Rep-1	433.47	187148	85	25	19.18		EPGQDLVVLPLSITTDFIPSFR	508	22	6	46.37	3	815.437
	CTRL-Rep-1	433.47	187148	85	25	19.18		SGIPIVTSPYQIHFTK	343	16	4	28.62	3	596.659
	CTRL-Rep-1	433.47	187148	85	25	19.18		LPYSVVR	834	7	3	44.56	2	417.245
	CTRL-Rep-1	433.47	187148	85	25	19.18		WLNEQR	1254	6	2	29.61	2	423.221
	CTRL-Rep-1	433.47	187148	85	25	19.18		SEFPESWLWNVEDLK	764	15	3	21.33	3	626.959
	CTRL-Rep-1	433.47	187148	85	25	19.18		TIYTPGSTVLYR	136	12	3	36.02	2	685.871
	CTRL-Rep-1	433.47	187148	85	25	19.18		DFDFVPPVVR	1244	10	3	32.43	2	595.808
	CTRL-Rep-1	433.47	187148	85	25	19.18		EYVLPSFEVIVEPTEK	225	16	4	32.86	2	939.986
	CTRL-Rep-1	433.47	187148	85	25	19.18	Carbamidomethyl+C(8)	FISLGEACK	712	9	4	34.35	2	512.766
	CTRL-Rep-1	433.47	187148	85	25	19.18		AFSDR	1436	5	1	14.66	1	595.281
	CTRL-Rep-1	433.47	187148	85	25	19.18		FDLK	1360	4	1	14.37	1	522.287
	CTRL-Rep-1	433.47	187148	85	25	19.18		ENEGFTVTAEGK	1325	12	3	33.01	2	641.312
	CTRL-Rep-1	433.47	187148	85	25	19.18		TVAVR	940	5	1	14.66	1	545.337
	CTRL-Rep-1	433.47	187148	85	25	19.18		IHWESASLLR	1310	10	3	30.67	2	606.329
	CTRL-Rep-1	433.47	187148	85	25	19.18		DYAGVFSDAGLTFTSSSGQQTAQR	633	24	4	20.49	4	624.284
	CTRL-Rep-1	433.47	187148	85	25	19.18		SEETKENEGFTVTAEGK	1320	17	3	26.69	4	464.719
	CTRL-Rep-1	433.47	187148	85	25	19.18	Carbamidomethyl+C(17)	NTLIIYLDKVSHSEDDCLAFK	1441	21	3	16.4	3	827.747
	CTRL-Rep-1	433.47	187148	85	25	19.18	Phosphoryl STY(7)	IPIEDGSGEVVLSR	290	14	5	37.76	2	775.871
	CTRL-Rep-3	522.13	187148	81	25	19.18		TGLQEVEVK	904	9	5	49.68	2	501.774
	CTRL-Rep-3	522.13	187148	81	25	19.18		LPYSVVR	834	7	5	44.12	2	417.244
	CTRL-Rep-3	522.13	187148	81	25	19.18		SGIPIVTSPYQIHFTK	343	16	5	27.6	3	596.658
	CTRL-Rep-3	522.13	187148	81	25	19.18		SGSDEVQVGQQR	1570	12	3	38.64	2	645.306
	CTRL-Rep-3	522.13	187148	81	25	19.18		TIYTPGSTVLYR	136	12	4	44.69	2	685.866
	CTRL-Rep-3	522.13	187148	81	25	19.18		DYAGVFSDAGLTFTSSSGQQTAQR	633	24	8	28.1	4	624.299
	CTRL-Rep-3	522.13	187148	81	25	19.18		EPGQDLVVLPLSITTDFIPSFR	508	22	4	25.43	3	815.434
	CTRL-Rep-3	522.13	187148	81	25	19.18		AGDFLEANYMNLQR	1171	14	5	34.96	2	821.395
	CTRL-Rep-3	522.13	187148	81	25	19.18		LESEETMVLEAHDAQGDVPVTVTVHDFPGK	35	30	5	16.76	4	813.4
	CTRL-Rep-3	522.13	187148	81	25	19.18		GQGTLSVVTMYHAK	1337	14	5	22.22	3	497.918
	CTRL-Rep-3	522.13	187148	81	25	19.18		EDIPPADLSDQVPDTESETR	959	20	3	26.12	3	738.663
	CTRL-Rep-3	522.13	187148	81	25	19.18		WLNEQR	1254	6	2	29.31	2	423.212
	CTRL-Rep-3	522.13	187148	81	25	19.18		EYVLPSFEVIVEPTEK	225	16	4	32.36	2	939.992
	CTRL-Rep-3	522.13	187148	81	25	19.18		TMQALPYSTVGNSNNYLHLSVLR	439	23	3	15.07	3	860.106
	CTRL-Rep-3	522.13	187148	81	25	19.18	Carbamidomethyl+C(11)	VYAYYNLEESCTR	1478	13	3	28.45	2	834.382
	CTRL-Rep-3	522.13	187148	81	25	19.18		AFSDR	1436	5	1	14.5	1	595.28
	CTRL-Rep-3	522.13	187148	81	25	19.18		FDLK	1360	4	1	14.2	1	522.29
	CTRL-Rep-3	522.13	187148	81	25	19.18		FLTTAK	1209	6	1	14.81	2	340.7
	CTRL-Rep-3	522.13	187148	81	25	19.18		AEDLVGK	315	7	3	41.11	2	366.194
	CTRL-Rep-3	522.13	187148	81	25	19.18		QNQELK	855	6	1	14.81	2	380.201
	CTRL-Rep-3	522.13	187148	81	25	19.18	Carbamidomethyl+C(3)	DSCVGSLVVKSGQSEDR	556	17	3	18.95	3	608.294
	CTRL-Rep-3	522.13	187148	81	25	19.18		SDDKVTLEER	1522	10	3	32.01	2	596.295
	CTRL-Rep-3	522.13	187148	81	25	19.18		NEQVEIRAVLYNYR	841	14	5	37.24	3	589.649
	CTRL-Rep-3	522.13	187148	81	25	19.18		KQELSEAEQATR	427	12	5	38.67	2	695.35
	CTRL-Rep-3	522.13	187148	81	25	19.18	Oxidation+M(12)	VQLSNDFDEYIMAIEQTIK	1551	19	5	24.32	4	569.029
sp|P01037|CYTN_HUMAN Cystatin-SN OS=Homo sapiens GN=CST1 PE=1 SV=3	CTRL-Rep-1	244.18	16387	25	4	31.91		ALHFAISEYNK	46	11	17	174.65	2	646.836
	CTRL-Rep-1	244.18	16387	25	4	31.91	Carbamidomethyl+C(8)	SQPNLDTCAFHEQPELQK	96	18	5	25.6	3	714.665
	CTRL-Rep-1	244.18	16387	25	4	31.91	Carbamidomethyl+C(3)	QLCSFEIYEVPWENRR	115	16	7	26.78	3	709.339
	CTRL-Rep-1	244.18	16387	25	4	31.91		ALHFAISEYNK	46	11	0	1.75	3	425.55
	CTRL-Rep-3	286.53	16387	26	3	31.91		ALHFAISEYNK	46	11	17	187.36	2	646.833
	CTRL-Rep-3	286.53	16387	26	3	31.91	Carbamidomethyl+C(8)	SQPNLDTCAFHEQPELQK	96	18	6	38.73	3	714.663
	CTRL-Rep-3	286.53	16387	26	3	31.91	Carbamidomethyl+C(3)	QLCSFEIYEVPWENRR	115	16	6	41.39	3	709.338
	CTRL-Rep-4	233.23	16387	22	3	31.91		ALHFAISEYNK	46	11	18	155.98	2	646.832
	CTRL-Rep-4	233.23	16387	22	3	31.91	Carbamidomethyl+C(3)	QLCSFEIYEVPWENRR	115	16	6	26.3	3	709.341
	CTRL-Rep-4	233.23	16387	22	3	31.91		IIPGGIYNADLNDEWVQR	28	18	3	26.91	2	1037.03
	POAG-Rep-2	237.18	16387	26	3	31.91		ALHFAISEYNK	46	11	17	158.02	2	646.833
	POAG-Rep-2	237.18	16387	26	3	31.91	Carbamidomethyl+C(8)	SQPNLDTCAFHEQPELQK	96	18	6	39.15	3	714.662
	POAG-Rep-2	237.18	16387	26	3	31.91	Carbamidomethyl+C(3)	QLCSFEIYEVPWENRR	115	16	7	37.6	3	709.34
	POAG-Rep-4	257.25	16387	30	4	31.91		ALHFAISEYNK	46	11	19	174.01	2	646.836
	POAG-Rep-4	257.25	16387	30	4	31.91	Carbamidomethyl+C(3)	QLCSFEIYEVPWENRR	115	16	9	41.17	3	709.337
	POAG-Rep-4	257.25	16387	30	4	31.91	Carbamidomethyl+C(8)	SQPNLDTCAFHEQPELQK	96	18	8	45.73	3	714.676
	POAG-Rep-4	257.25	16387	30	4	31.91	Carbamidomethyl+C(3)	QLCSFEIYEVPWENR	115	15	4	21.21	4	493.242
sp|P01036|CYTS_HUMAN Cystatin-S OS=Homo sapiens GN=CST4 PE=1 SV=3	CTRL-Rep-1	523.31	16214	71	7	55.32		RPLQVLR	65	7	17	117.85	2	441.284
	CTRL-Rep-1	523.31	16214	71	7	55.32		ALHFAISEYNK	46	11	17	174.65	2	646.836
	CTRL-Rep-1	523.31	16214	71	7	55.32		ATEDEYYR	57	8	8	69.4	2	523.724
	CTRL-Rep-1	523.31	16214	71	7	55.32	Carbamidomethyl+C(8)	SQPNLDTCAFHEQPELQK	96	18	5	25.6	3	714.665
	CTRL-Rep-1	523.31	16214	71	7	55.32	Carbamidomethyl+C(3)	QLCSFEIYEVPWEDR	115	15	19	148.6	2	985.952
	CTRL-Rep-1	523.31	16214	71	7	55.32		IIPGGIYDADLNDEWVQR	28	18	11	140.1	2	1037.52
	CTRL-Rep-1	523.31	16214	71	7	55.32	Carbamidomethyl+C(4)	KQLCSFEIYEVPWEDR	114	16	6	41.4	3	700.334
	CTRL-Rep-3	539.49	16214	70	10	55.32		ATEDEYYR	57	8	11	83.16	2	523.721
	CTRL-Rep-3	539.49	16214	70	10	55.32		ALHFAISEYNK	46	11	17	187.36	2	646.833
	CTRL-Rep-3	539.49	16214	70	10	55.32	Carbamidomethyl+C(8)	SQPNLDTCAFHEQPELQK	96	18	6	38.73	3	714.663
	CTRL-Rep-3	539.49	16214	70	10	55.32		IIPGGIYDADLNDEWVQR	28	18	11	79.23	2	1037.51
	CTRL-Rep-3	539.49	16214	70	10	55.32	Carbamidomethyl+C(3)	QLCSFEIYEVPWEDR	115	15	16	152.57	2	985.956
	CTRL-Rep-3	539.49	16214	70	10	55.32		RPLQVLR	65	7	11	116.64	2	441.282
	CTRL-Rep-3	539.49	16214	70	10	55.32	Carbamidomethyl+C(4)	KQLCSFEIYEVPWEDR	114	16	4	28.28	3	700.331
	CTRL-Rep-3	539.49	16214	70	10	55.32		PGGIYDADLNDEWVQR	30	16	4	42.41	2	924.435
	CTRL-Rep-3	539.49	16214	70	10	55.32	Carbamidomethyl+C(6)	PNLDTCAFHEQPELQK	98	16	0	3.93	2	963.952
	CTRL-Rep-3	539.49	16214	70	10	55.32		ATEDEYYR	57	8	0	0.91	2	514.723
	CTRL-Rep-4	602.01	16214	66	7	49.65		RPLQVLR	65	7	16	116.19	2	441.285
	CTRL-Rep-4	602.01	16214	66	7	49.65		ALHFAISEYNK	46	11	18	155.98	2	646.832
	CTRL-Rep-4	602.01	16214	66	7	49.65		IIPGGIYDADLNDEWVQR	28	18	14	103.32	2	1037.51
	CTRL-Rep-4	602.01	16214	66	7	49.65	Carbamidomethyl+C(3)	QLCSFEIYEVPWEDR	115	15	23	216.43	2	985.952
	CTRL-Rep-4	602.01	16214	66	7	49.65	Carbamidomethyl+C(4)	KQLCSFEIYEVPWEDR	114	16	3	19.77	3	700.332
	CTRL-Rep-4	602.01	16214	66	7	49.65	Carbamidomethyl+C(8)	SQPNLDTCAFHEQPELQKK	96	19	4	24.21	4	568.271
	CTRL-Rep-4	602.01	16214	66	7	49.65	Phosphoryl STY(7)	IIPGGIYDADLNDEWVQR	28	18	4	25.38	3	718.663
	POAG-Rep-1	407.85	16214	54	6	46.81		RPLQVLR	65	7	16	118.49	2	441.284
	POAG-Rep-1	407.85	16214	54	6	46.81	Carbamidomethyl+C(8)	SQPNLDTCAFHEQPELQK	96	18	7	39.47	3	714.666
	POAG-Rep-1	407.85	16214	54	6	46.81		ATEDEYYR	57	8	9	59.82	2	523.723
	POAG-Rep-1	407.85	16214	54	6	46.81	Carbamidomethyl+C(3)	QLCSFEIYEVPWEDR	115	15	21	188.43	2	985.954
	POAG-Rep-1	407.85	16214	54	6	46.81		IIPGGIYDADLNDEWVQR	28	18	9	102.1	2	1037.52
	POAG-Rep-1	407.85	16214	54	6	46.81	Carbamidomethyl+C(6)	PNLDTCAFHEQPELQK	98	16	1	7.33	2	963.953
	POAG-Rep-2	737.73	16214	80	10	66.67		ATEDEYYR	57	8	13	74.07	2	523.722
	POAG-Rep-2	737.73	16214	80	10	66.67		RPLQVLR	65	7	17	117.7	2	441.285
	POAG-Rep-2	737.73	16214	80	10	66.67		ALHFAISEYNK	46	11	17	158.02	2	646.833
	POAG-Rep-2	737.73	16214	80	10	66.67	Carbamidomethyl+C(8)	SQPNLDTCAFHEQPELQK	96	18	6	39.15	3	714.662
	POAG-Rep-2	737.73	16214	80	10	66.67		IIPGGIYDADLNDEWVQR	28	18	12	122.55	2	1037.52
	POAG-Rep-2	737.73	16214	80	10	66.67	Carbamidomethyl+C(3)	QLCSFEIYEVPWEDR	115	15	25	209.51	2	985.952
	POAG-Rep-2	737.73	16214	80	10	66.67		ATEDEYYRRPLQVLR	57	15	8	61.36	3	636.999
	POAG-Rep-2	737.73	16214	80	10	66.67		EQTFGGVNYFFDVEVGR	74	17	3	19.24	4	491.739
	POAG-Rep-2	737.73	16214	80	10	66.67		EDEYYRRPLQVLR	59	13	0	2.93	3	579.642
	POAG-Rep-2	737.73	16214	80	10	66.67		ATEDEYYRRP	57	10	0	2.93	2	650.309
	POAG-Rep-4	614.74	16214	71	11	55.32		ATEDEYYR	57	8	13	59.3	2	523.719
	POAG-Rep-4	614.74	16214	71	11	55.32		RPLQVLR	65	7	16	117.42	2	441.285
	POAG-Rep-4	614.74	16214	71	11	55.32		ALHFAISEYNK	46	11	19	174.01	2	646.836
	POAG-Rep-4	614.74	16214	71	11	55.32		IIPGGIYDADLNDEWVQR	28	18	12	89.32	2	1037.51
	POAG-Rep-4	614.74	16214	71	11	55.32	Carbamidomethyl+C(3)	QLCSFEIYEVPWEDR	115	15	13	134.68	2	985.951
	POAG-Rep-4	614.74	16214	71	11	55.32		ATEDEYYRRPLQVLR	57	15	5	33.89	3	637.001
	POAG-Rep-4	614.74	16214	71	11	55.32	Carbamidomethyl+C(8)	SQPNLDTCAFHEQPELQK	96	18	8	45.73	3	714.676
	POAG-Rep-4	614.74	16214	71	11	55.32	Carbamidomethyl+C(4)	KQLCSFEIYEVPWEDR	114	16	3	20.12	3	700.332
	POAG-Rep-4	614.74	16214	71	11	55.32		EDEYYRRPLQVLR	59	13	0	2.96	3	579.645
	POAG-Rep-4	614.74	16214	71	11	55.32		ALHFAISEYNK	46	11	0	1.77	3	425.551
	POAG-Rep-4	614.74	16214	71	11	55.32		ATEDEYYR	57	8	0	0.89	2	514.722
sp|P09228|CYTT_HUMAN Cystatin-SA OS=Homo sapiens GN=CST2 PE=1 SV=1	CTRL-Rep-1	127.7	16444	13	2	18.44		ATEDEYYR	57	8	8	69.4	2	523.724
	CTRL-Rep-1	127.7	16444	13	2	18.44	Carbamidomethyl+C(8)	SQPNLDTCAFHEQPELQK	96	18	5	25.6	3	714.665
	CTRL-Rep-3	148.89	16444	15	2	18.44		ATEDEYYR	57	8	11	83.16	2	523.721
	CTRL-Rep-3	148.89	16444	15	2	18.44	Carbamidomethyl+C(8)	SQPNLDTCAFHEQPELQK	96	18	6	38.73	3	714.663
	POAG-Rep-1	117.23	16444	15	3	18.44	Carbamidomethyl+C(8)	SQPNLDTCAFHEQPELQK	96	18	7	39.47	3	714.666
	POAG-Rep-1	117.23	16444	15	3	18.44		ATEDEYYR	57	8	9	59.82	2	523.723
	POAG-Rep-1	117.23	16444	15	3	18.44		ATEDEYYR	57	8	1	10.83	2	514.721
	POAG-Rep-2	116.28	16444	15	2	18.44		ATEDEYYR	57	8	13	74.07	2	523.722
	POAG-Rep-2	116.28	16444	15	2	18.44	Carbamidomethyl+C(8)	SQPNLDTCAFHEQPELQK	96	18	6	39.15	3	714.662
	POAG-Rep-4	104.46	16444	13	2	18.44		ATEDEYYR	57	8	13	59.3	2	523.719
	POAG-Rep-4	104.46	16444	13	2	18.44	Carbamidomethyl+C(8)	SQPNLDTCAFHEQPELQK	96	18	8	45.73	3	714.676
sp|Q05193|DYN1_HUMAN Dynamin-1 OS=Homo sapiens GN=DNM1 PE=1 SV=2	CTRL-Rep-3	216.13	97408	25	9	10.76		APAVPPARPGSR	784	12	4	44.69	3	392.561
	CTRL-Rep-3	216.13	97408	25	9	10.76		TGLFTPDMAFETIVK	399	15	3	37.51	3	557.284
	CTRL-Rep-3	216.13	97408	25	9	10.76		SSVLENFVGR	44	10	4	30.25	2	554.294
	CTRL-Rep-3	216.13	97408	25	9	10.76		EVEEYK	309	6	1	14.81	2	398.692
	CTRL-Rep-3	216.13	97408	25	9	10.76		DLMPK	678	5	1	14.5	1	603.311
	CTRL-Rep-3	216.13	97408	25	9	10.76		RAPAVPPARPGSR	783	13	4	31.16	3	444.591
	CTRL-Rep-3	216.13	97408	25	9	10.76		FTDFEEVRLEIEAETDR	90	17	5	25.94	4	525.503
	CTRL-Rep-3	216.13	97408	25	9	10.76		GFMSSKHIFALFNTEQR	577	17	4	30.06	3	671.666
	CTRL-Rep-3	216.13	97408	25	9	10.76		KFFLSHPSYR	256	10	3	37.24	2	641.335
sp|P06733|ENOA_HUMAN Alpha-enolase OS=Homo sapiens GN=ENO1 PE=1 SV=2	CTRL-Rep-1	297.5	47169	62	17	46.08		IEEELGSK	412	8	8	62.52	2	452.73
	CTRL-Rep-1	297.5	47169	62	17	46.08		YISPDQLADLYK	269	12	4	29.79	2	713.368
	CTRL-Rep-1	297.5	47169	62	17	46.08		IGAEVYHNLK	183	10	8	45.32	2	572.311
	CTRL-Rep-1	297.5	47169	62	17	46.08		LAQANGWGVMVSHR	358	14	7	46.01	3	509.256
	CTRL-Rep-1	297.5	47169	62	17	46.08	Carbamidomethyl+C(14)	VNQIGSVTESLQACK	343	15	4	27.36	2	817.417
	CTRL-Rep-1	297.5	47169	62	17	46.08		GNPTVEVDLFTSK	15	13	5	46.2	2	703.856
	CTRL-Rep-1	297.5	47169	62	17	46.08		LAMQEFMILPVGAANFR	162	17	3	19.29	2	954.5
	CTRL-Rep-1	297.5	47169	62	17	46.08	Carbamidomethyl+C(2);Carbamidomethyl+C(4)	SCNCLLLK	335	8	3	44.85	2	504.254
	CTRL-Rep-1	297.5	47169	62	17	46.08		HIADLAGNSEVILPVPAFNVINGGSHAGNK	132	30	9	47.21	4	753.637
	CTRL-Rep-1	297.5	47169	62	17	46.08		AAVPSGASTGIYEALELR	32	18	3	18.44	2	902.979
	CTRL-Rep-1	297.5	47169	62	17	46.08		AVEHINK	64	7	5	56.21	2	405.72
	CTRL-Rep-1	297.5	47169	62	17	46.08		SGKYDLDFK	253	9	3	34.35	2	536.764
	CTRL-Rep-1	297.5	47169	62	17	46.08		IDKLMIEMDGTENK	89	14	4	31.16	2	818.902
	CTRL-Rep-1	297.5	47169	62	17	46.08		SFIKDYPVVSIEDPFDQDDWGAWQK	281	25	4	26.61	3	995.798
	CTRL-Rep-1	297.5	47169	62	17	46.08		GAEVYHNLK	184	9	0	1.46	2	515.768
	CTRL-Rep-1	297.5	47169	62	17	46.08		QANGWGVMVSHR	360	12	0	2.63	2	671.323
	CTRL-Rep-1	297.5	47169	62	17	46.08		LAQANGWGVMVSHR	358	14	0	2.63	3	503.59
	CTRL-Rep-3	248.65	47169	39	9	19.12		IEEELGSK	412	8	8	61.93	2	452.73
	CTRL-Rep-3	248.65	47169	39	9	19.12		IGAEVYHNLK	183	10	8	44.76	2	572.31
	CTRL-Rep-3	248.65	47169	39	9	19.12		YISPDQLADLYK	269	12	4	29.4	2	713.368
	CTRL-Rep-3	248.65	47169	39	9	19.12		GNPTVEVDLFTSK	15	13	4	32.92	2	703.856
	CTRL-Rep-3	248.65	47169	39	9	19.12		LAMQEFMILPVGAANFR	162	17	3	18.95	2	954.498
	CTRL-Rep-3	248.65	47169	39	9	19.12		LAQANGWGVMVSHR	358	14	7	76.26	3	509.255
	CTRL-Rep-3	248.65	47169	39	9	19.12		SGKYDLDFK	253	9	6	65.95	3	358.179
	CTRL-Rep-3	248.65	47169	39	9	19.12	Oxidation+M(5)	VVIGMDVAASEFFR	239	14	3	22.22	3	519.598
	CTRL-Rep-3	248.65	47169	39	9	19.12		GAEVYHNLK	184	9	0	1.51	2	515.765
	POAG-Rep-1	352.43	47169	45	11	24.65		IEEELGSK	412	8	11	72.8	2	452.731
	POAG-Rep-1	352.43	47169	45	11	24.65	Carbamidomethyl+C(2);Carbamidomethyl+C(4)	SCNCLLLK	335	8	10	72.8	2	504.253
	POAG-Rep-1	352.43	47169	45	11	24.65		IGAEVYHNLK	183	10	7	60.39	2	572.31
	POAG-Rep-1	352.43	47169	45	11	24.65		GNPTVEVDLFTSK	15	13	4	48.24	2	703.859
	POAG-Rep-1	352.43	47169	45	11	24.65		LAMQEFMILPVGAANFR	162	17	4	43.83	3	636.663
	POAG-Rep-1	352.43	47169	45	11	24.65		LAQANGWGVMVSHR	358	14	3	22.79	3	509.254
	POAG-Rep-1	352.43	47169	45	11	24.65		YISPDQLADLYK	269	12	3	26.02	2	713.368
	POAG-Rep-1	352.43	47169	45	11	24.65		FAGR	422	4	1	14.45	1	450.242
	POAG-Rep-1	352.43	47169	45	11	24.65		AVEHINK	64	7	4	41.78	2	405.721
	POAG-Rep-1	352.43	47169	45	11	24.65		IDKLMIEMDGTENK	89	14	3	28.23	2	818.892
	POAG-Rep-1	352.43	47169	45	11	24.65		GAEVYHNLK	184	9	0	1.43	2	515.766
	POAG-Rep-2	324.06	47169	59	15	37.56		IEEELGSK	412	8	7	62.45	2	452.731
	POAG-Rep-2	324.06	47169	59	15	37.56		IGAEVYHNLK	183	10	7	67.67	2	572.31
	POAG-Rep-2	324.06	47169	59	15	37.56		YISPDQLADLYK	269	12	5	25.76	2	713.366
	POAG-Rep-2	324.06	47169	59	15	37.56	Carbamidomethyl+C(14)	VNQIGSVTESLQACK	343	15	5	34.01	2	817.414
	POAG-Rep-2	324.06	47169	59	15	37.56		HIADLAGNSEVILPVPAFNVINGGSHAGNK	132	30	8	57.73	4	753.64
	POAG-Rep-2	324.06	47169	59	15	37.56		AAVPSGASTGIYEALELR	32	18	4	18.4	2	902.977
	POAG-Rep-2	324.06	47169	59	15	37.56		GNPTVEVDLFTSK	15	13	5	39.23	2	703.854
	POAG-Rep-2	324.06	47169	59	15	37.56	Carbamidomethyl+C(2);Carbamidomethyl+C(4)	SCNCLLLK	335	8	7	69.3	2	504.251
	POAG-Rep-2	324.06	47169	59	15	37.56		LAQANGWGVMVSHR	358	14	7	58.22	3	509.255
	POAG-Rep-2	324.06	47169	59	15	37.56		YMGK	56	4	1	14.35	1	498.238
	POAG-Rep-2	324.06	47169	59	15	37.56		FAGR	422	4	1	14.35	1	450.244
	POAG-Rep-2	324.06	47169	59	15	37.56		AVEHINK	64	7	6	76.79	2	405.724
	POAG-Rep-2	324.06	47169	59	15	37.56		AGYTDKVVIGMDVAASEFFR	233	20	3	16.97	4	544.768
	POAG-Rep-2	324.06	47169	59	15	37.56		GAEVYHNLK	184	9	0	1.47	2	515.766
	POAG-Rep-2	324.06	47169	59	15	37.56		IYEALELR	42	8	0	3.82	2	503.781
	POAG-Rep-4	342.12	47169	56	17	30.88		IEEELGSK	412	8	6	62.31	2	452.729
	POAG-Rep-4	342.12	47169	56	17	30.88		LAQANGWGVMVSHR	358	14	8	67.73	3	509.257
	POAG-Rep-4	342.12	47169	56	17	30.88		IGAEVYHNLK	183	10	8	59.89	2	572.309
	POAG-Rep-4	342.12	47169	56	17	30.88		YISPDQLADLYK	269	12	4	25.67	2	713.365
	POAG-Rep-4	342.12	47169	56	17	30.88		AAVPSGASTGIYEALELR	32	18	5	28.95	2	902.978
	POAG-Rep-4	342.12	47169	56	17	30.88		GNPTVEVDLFTSK	15	13	4	47.77	2	703.854
	POAG-Rep-4	342.12	47169	56	17	30.88		LAMQEFMILPVGAANFREAMR	162	21	5	34.6	4	599.551
	POAG-Rep-4	342.12	47169	56	17	30.88	Carbamidomethyl+C(2);Carbamidomethyl+C(4)	SCNCLLLK	335	8	3	44.7	2	504.251
	POAG-Rep-4	342.12	47169	56	17	30.88		YMGK	56	4	1	14.31	1	498.235
	POAG-Rep-4	342.12	47169	56	17	30.88		YDLDFK	256	6	1	14.9	1	800.374
	POAG-Rep-4	342.12	47169	56	17	30.88		EIFDSR	9	6	1	14.9	1	766.372
	POAG-Rep-4	342.12	47169	56	17	30.88		AVEHINK	64	7	3	44.4	2	405.721
	POAG-Rep-4	342.12	47169	56	17	30.88		GLFR	28	4	1	14.31	1	492.289
	POAG-Rep-4	342.12	47169	56	17	30.88		SGKYDLDFK	253	9	7	66.42	2	536.768
	POAG-Rep-4	342.12	47169	56	17	30.88	Oxidation+M(3)	LAMQEFMILPVGAANFREAMR	162	21	4	16.29	3	804.414
	POAG-Rep-4	342.12	47169	56	17	30.88		GAEVYHNLK	184	9	0	1.48	2	515.765
	POAG-Rep-4	342.12	47169	56	17	30.88		QANGWGVMVSHR	360	12	0	2.66	2	671.328
sp|Q14677|EPN4_HUMAN Clathrin interactor 1 OS=Homo sapiens GN=CLINT1 PE=1 SV=1	CTRL-Rep-3	138.26	68259	29	10	16.16		ELVEFAQDDDR	133	11	3	34.54	3	446.202
	CTRL-Rep-3	138.26	68259	29	10	16.16		YVGVSSDSVGGFR	158	13	4	45.66	2	665.327
	CTRL-Rep-3	138.26	68259	29	10	16.16		SLENYHFVDEHGK	109	13	4	23.68	3	525.582
	CTRL-Rep-3	138.26	68259	29	10	16.16		VVTSAR	96	6	1	14.81	1	632.376
	CTRL-Rep-3	138.26	68259	29	10	16.16		MLNMWK	0	6	1	14.81	1	822.402
	CTRL-Rep-3	138.26	68259	29	10	16.16		IGSTIDDTISK	207	11	4	41.26	2	575.311
	CTRL-Rep-3	138.26	68259	29	10	16.16		ATNVVMNYSEIESK	13	14	3	22.22	2	792.879
	CTRL-Rep-3	138.26	68259	29	10	16.16		NKSAFPFSDK	190	10	4	43.97	2	570.785
	CTRL-Rep-3	138.26	68259	29	10	16.16		SQNTDMVQKSVSK	458	13	4	32.92	2	726.355
	CTRL-Rep-3	138.26	68259	29	10	16.16		YVGVSSDSVGGFRYSER	158	17	3	18.95	3	622.292
sp|C9JLW8|F195B_HUMAN Protein FAM195B OS=Homo sapiens GN=FAM195B PE=1 SV=1	CTRL-Rep-4	65.35	10920	9	2	29.9		SPPSSSEIFTPAHEENVR	20	18	7	30.22	3	661.978
	CTRL-Rep-4	65.35	10920	9	2	29.9		FIYEAWQGVER	38	11	4	27.4	2	699.341
sp|Q969U6|FBXW5_HUMAN F-box/WD repeat-containing protein 5 OS=Homo sapiens GN=FBXW5 PE=1 SV=1	POAG-Rep-2	89.56	63922	16	5	7.77	Carbamidomethyl+C(5)	HYNICLAR	498	8	6	53.41	2	523.766
	POAG-Rep-2	89.56	63922	16	5	7.77	Carbamidomethyl+C(18)	FDSPDLLLEAGDPATSPCR	259	19	3	17.64	4	515.99
	POAG-Rep-2	89.56	63922	16	5	7.77		YYQVAR	52	6	2	14.93	2	400.213
	POAG-Rep-2	89.56	63922	16	5	7.77		DEFLWREQFYR	41	11	6	39.66	3	530.255
	POAG-Rep-2	89.56	63922	16	5	7.77	Oxidation+M(22)	GSDAFFDALDHVIDIHGHIIGMGLSPDNR	386	29	3	23.54	4	784.63
sp|P04406|G3P_HUMAN Glyceraldehyde-3-phosphate dehydrogenase OS=Homo sapiens GN=GAPDH PE=1 SV=3	POAG-Rep-2	184.51	36053	28	6	23.58	Carbamidomethyl+C(13)	VPTANVSVVDLTCR	234	14	11	125.36	2	765.902
	POAG-Rep-2	184.51	36053	28	6	23.58	Carbamidomethyl+C(7);Carbamidomethyl+C(11)	IISNASCTTNCLAPLAK	145	17	5	26.23	2	917.466
	POAG-Rep-2	184.51	36053	28	6	23.58		VGVNGFGR	5	8	4	59.44	2	403.215
	POAG-Rep-2	184.51	36053	28	6	23.58		GALQNIIPASTGAAK	200	15	3	29.37	2	706.402
	POAG-Rep-2	184.51	36053	28	6	23.58		LISWYDNEFGYSNRVVDLMAHMASK	309	25	3	24.93	4	737.353
	POAG-Rep-2	184.51	36053	28	6	23.58	Oxidation+M(15)	VIISAPSADAPMFVMGVNHEK	118	21	3	24.81	4	558.029
sp|Q8N9F7|GDPD1_HUMAN Glycerophosphodiester phosphodiesterase domain-containing protein 1 OS=Homo sapiens GN=GDPD1 PE=1 SV=2	POAG-Rep-2	102.9	36167	17	4	15.61	Carbamidomethyl+C(10)	IGTDMLELDCHITK	65	14	5	45.13	3	549.272
	POAG-Rep-2	102.9	36167	17	4	15.61		GIQVYIWVLNEEQEYK	271	16	4	44.3	3	671.004
	POAG-Rep-2	102.9	36167	17	4	15.61	Carbamidomethyl+C(29)	GGAGENLENTMAAFQHAVKIGTDMLELDCHITK	46	33	6	35.13	4	893.67
	POAG-Rep-2	102.9	36167	17	4	15.61	Phosphoryl STY(7)	DEQVVVSHDENLKR	79	14	3	27.98	2	874.397
sp|P09211|GSTP1_HUMAN Glutathione S-transferase P OS=Homo sapiens GN=GSTP1 PE=1 SV=2	CTRL-Rep-4	150.34	23355	32	8	42.38		ALPGQLKPFETLLSQNQGGK	121	20	11	60.27	3	709.388
	CTRL-Rep-4	150.34	23355	32	8	42.38	Carbamidomethyl+C(3)	ASCLYGQLPK	45	10	7	47.56	2	568.79
	CTRL-Rep-4	150.34	23355	32	8	42.38		FQDGDLTLYQSNTILR	55	16	6	28.14	2	942.48
	CTRL-Rep-4	150.34	23355	32	8	42.38		TLGLYGK	75	7	3	40.94	2	376.217
	CTRL-Rep-4	150.34	23355	32	8	42.38		DQQEAALVDMVNDGVEDLR	82	19	4	17.25	3	706.332
	CTRL-Rep-4	150.34	23355	32	8	42.38		MLLADQGQSWK	19	11	7	58.05	3	426.209
	CTRL-Rep-4	150.34	23355	32	8	42.38		LSARPK	183	6	1	14.75	2	336.211
	CTRL-Rep-4	150.34	23355	32	8	42.38		FQDGDLTLYQSNTI	55	14	0	3.37	3	538.929
sp|P02790|HEMO_HUMAN Hemopexin OS=Homo sapiens GN=HPX PE=1 SV=2	POAG-Rep-1	210.02	51676	37	11	25.97		NFPSPVDAAFR	91	11	6	75.42	2	610.808
	POAG-Rep-1	210.02	51676	37	11	25.97		LWWLDLK	379	7	4	44.79	2	487.278
	POAG-Rep-1	210.02	51676	37	11	25.97	Carbamidomethyl+C(19)	EVGTPHGIILDSVDAAFICPGSSR	347	24	5	47.8	3	833.415
	POAG-Rep-1	210.02	51676	37	11	25.97	Carbamidomethyl+C(8)	SWPAVGNCSSALR	180	13	5	24.26	2	702.836
	POAG-Rep-1	210.02	51676	37	11	25.97	Carbamidomethyl+C(19)	LLQDEFPGIPSPLDAAVECHR	130	21	3	16.56	3	788.723
	POAG-Rep-1	210.02	51676	37	11	25.97	Carbamidomethyl+C(14)	ALPQPQNVTSLLGCTH	446	16	3	28.8	3	579.295
	POAG-Rep-1	210.02	51676	37	11	25.97		WLGR	193	4	1	14.45	1	531.299
	POAG-Rep-1	210.02	51676	37	11	25.97		GEFVWK	71	6	1	15.03	2	383.198
	POAG-Rep-1	210.02	51676	37	11	25.97	Carbamidomethyl+C(10)	ERSWPAVGNCSSALR	178	15	3	21.52	4	423.206
	POAG-Rep-1	210.02	51676	37	11	25.97	Carbamidomethyl+C(7)	WLGRYYCFQGNQFLR	193	15	3	29.61	3	669.999
	POAG-Rep-1	210.02	51676	37	11	25.97	Carbamidomethyl+C(19)	LNAAKALPQPQNVTSLLGCTH	441	21	8	43.93	3	745.055
sp|P04792|HSPB1_HUMAN Heat shock protein beta-1 OS=Homo sapiens GN=HSPB1 PE=1 SV=2	CTRL-Rep-1	201.27	22782	40	8	55.12		VSLDVNHFAPDELTVK	96	16	13	54.02	3	595.306
	CTRL-Rep-1	201.27	22782	40	8	55.12		LFDQAFGLPR	27	10	9	89.41	2	582.312
	CTRL-Rep-1	201.27	22782	40	8	55.12		LATQSNEITIPVTFESR	171	17	7	30.56	2	953.504
	CTRL-Rep-1	201.27	22782	40	8	55.12		QDEHGYISR	127	9	5	34.35	2	552.757
	CTRL-Rep-1	201.27	22782	40	8	55.12		GPSWDPFR	12	8	4	40.08	2	481.237
	CTRL-Rep-1	201.27	22782	40	8	55.12		LPEEWSQWLGGSSWPGYVRPLPPAAIESPAVAAPAYSR	37	38	6	14.37	4	1024.01
	CTRL-Rep-1	201.27	22782	40	8	55.12		QLSSGVSEIRHTADR	79	15	3	21.33	3	552.625
	CTRL-Rep-1	201.27	22782	40	8	55.12		QDEHGYISR	127	9	0	1.17	2	544.24
	CTRL-Rep-3	198.4	22782	39	6	48.78		LFDQAFGLPR	27	10	10	96.05	2	582.312
	CTRL-Rep-3	198.4	22782	39	6	48.78		VSLDVNHFAPDELTVK	96	16	10	54.39	3	595.306
	CTRL-Rep-3	198.4	22782	39	6	48.78		LATQSNEITIPVTFESR	171	17	4	26.35	2	953.501
	CTRL-Rep-3	198.4	22782	39	6	48.78		QLSSGVSEIR	79	10	5	30.25	2	538.288
	CTRL-Rep-3	198.4	22782	39	6	48.78		QDEHGYISR	127	9	3	41.71	2	552.758
	CTRL-Rep-3	198.4	22782	39	6	48.78		LPEEWSQWLGGSSWPGYVRPLPPAAIESPAVAAPAYSR	37	38	14	90.62	4	1024.01
	CTRL-Rep-4	197.28	22782	50	12	58.54		LFDQAFGLPR	27	10	12	111.09	2	582.31
	CTRL-Rep-4	197.28	22782	50	12	58.54		QDEHGYISR	127	9	5	49.34	2	552.756
	CTRL-Rep-4	197.28	22782	50	12	58.54		LATQSNEITIPVTFESR	171	17	8	29.88	2	953.498
	CTRL-Rep-4	197.28	22782	50	12	58.54		VSLDVNHFAPDELTVK	96	16	3	26.3	3	595.306
	CTRL-Rep-4	197.28	22782	50	12	58.54		QLSSGVSEIR	79	10	3	37.09	2	538.286
	CTRL-Rep-4	197.28	22782	50	12	58.54		VPFSLLR	5	7	3	40.94	2	416.253
	CTRL-Rep-4	197.28	22782	50	12	58.54		LPEEWSQWLGGSSWPGYVRPLPPAAIESPAVAAPAYSR	37	38	11	74.74	4	1024.01
	CTRL-Rep-4	197.28	22782	50	12	58.54		DGVVEITGKHEER	114	13	7	61.14	3	490.25
	CTRL-Rep-4	197.28	22782	50	12	58.54	Phosphoryl STY(9)	LATQSNEITIPVTFESR	171	17	5	37.45	4	497.241
	CTRL-Rep-4	197.28	22782	50	12	58.54		DEHGYISR	128	8	0	1.23	2	488.728
	CTRL-Rep-4	197.28	22782	50	12	58.54		QAFGLPR	30	7	0	1.53	1	788.439
	CTRL-Rep-4	197.28	22782	50	12	58.54		QDEHGYISR	127	9	0	1.23	2	544.243
	POAG-Rep-1	216.02	22782	42	8	57.07		VSLDVNHFAPDELTVK	96	16	11	52.81	3	595.307
	POAG-Rep-1	216.02	22782	42	8	57.07		LFDQAFGLPR	27	10	11	97.62	2	582.311
	POAG-Rep-1	216.02	22782	42	8	57.07		LATQSNEITIPVTFESR	171	17	6	38.39	2	953.5
	POAG-Rep-1	216.02	22782	42	8	57.07		QDEHGYISR	127	9	3	42.36	2	552.758
	POAG-Rep-1	216.02	22782	42	8	57.07		QLSSGVSEIR	79	10	5	53.4	2	538.29
	POAG-Rep-1	216.02	22782	42	8	57.07		LPEEWSQWLGGSSWPGYVRPLPPAAIESPAVAAPAYSR	37	38	7	41.55	4	1024.02
	POAG-Rep-1	216.02	22782	42	8	57.07		AQLGGPEAAKSDETAAK	188	17	3	19.47	3	548.61
	POAG-Rep-1	216.02	22782	42	8	57.07		PVTFESR	181	7	0	3.44	2	418.217
	POAG-Rep-2	268.54	22782	36	7	28.78		VSLDVNHFAPDELTVK	96	16	10	47.56	3	595.307
	POAG-Rep-2	268.54	22782	36	7	28.78		LFDQAFGLPR	27	10	9	89.3	2	582.31
	POAG-Rep-2	268.54	22782	36	7	28.78		QDEHGYISR	127	9	11	82.99	2	552.76
	POAG-Rep-2	268.54	22782	36	7	28.78		LATQSNEITIPVTFESR	171	17	6	30.49	2	953.502
	POAG-Rep-2	268.54	22782	36	7	28.78		VPFSLLR	5	7	5	44.5	2	416.254
	POAG-Rep-2	268.54	22782	36	7	28.78		DEHGYISR	128	8	2	9.79	2	488.731
	POAG-Rep-2	268.54	22782	36	7	28.78		QDEHGYISR	127	9	0	1.17	2	544.245
	POAG-Rep-4	222.45	22782	34	8	34.15		LFDQAFGLPR	27	10	10	89.1	2	582.308
	POAG-Rep-4	222.45	22782	34	8	34.15		QDEHGYISR	127	9	7	59.6	2	552.757
	POAG-Rep-4	222.45	22782	34	8	34.15		LATQSNEITIPVTFESR	171	17	5	26.57	2	953.502
	POAG-Rep-4	222.45	22782	34	8	34.15		VPFSLLR	5	7	6	41.39	2	416.253
	POAG-Rep-4	222.45	22782	34	8	34.15		TKDGVVEITGK	112	11	4	27.8	2	573.823
	POAG-Rep-4	222.45	22782	34	8	34.15		VSLDVNHFAPDELTVK	96	16	5	43.6	3	595.306
	POAG-Rep-4	222.45	22782	34	8	34.15		DEHGYISR	128	8	0	1.18	2	488.727
	POAG-Rep-4	222.45	22782	34	8	34.15		QDEHGYISR	127	9	0	1.18	2	544.243
sp|P01766|HV305_HUMAN Ig heavy chain V-III region BRO OS=Homo sapiens PE=1 SV=1	CTRL-Rep-3	88.11	13226	15	3	44.17	Carbamidomethyl+C(9)	AEDTAVYYCAR	86	11	7	58.77	2	659.793
	CTRL-Rep-3	88.11	13226	15	3	44.17		EVQLVESGGGLVQPGGSLR	0	19	5	29.58	3	628.01
	CTRL-Rep-3	88.11	13226	15	3	44.17		GLEWVSAIGTAGDQYYADSVKGR	43	23	4	23.43	3	815.076
	CTRL-Rep-4	122.09	13226	18	5	38.33	Carbamidomethyl+C(9)	AEDTAVYYCAR	86	11	10	95.19	2	659.792
	CTRL-Rep-4	122.09	13226	18	5	38.33		EVQLVESGGGLVQPGGSLR	0	19	5	29.41	2	941.51
	CTRL-Rep-4	122.09	13226	18	5	38.33		FTISR	66	5	2	14.45	1	623.346
	CTRL-Rep-4	122.09	13226	18	5	38.33		NTLYLNMNSLR	75	11	4	27.4	2	669.848
	CTRL-Rep-4	122.09	13226	18	5	38.33		EVQLVESGGGLVQPGG	0	16	1	7.28	2	763.402
	POAG-Rep-1	97.63	13226	19	4	46.67	Carbamidomethyl+C(9)	AEDTAVYYCAR	86	11	7	79.37	2	659.795
	POAG-Rep-1	97.63	13226	19	4	46.67		EVQLVESGGGLVQPGGSLR	0	19	6	17.85	3	628.01
	POAG-Rep-1	97.63	13226	19	4	46.67		FTISR	66	5	1	14.74	1	623.346
	POAG-Rep-1	97.63	13226	19	4	46.67		GLEWVSAIGTAGDQYYADSVK	43	21	7	59.36	3	744.027
sp|P01876|IGHA1_HUMAN Ig alpha-1 chain C region OS=Homo sapiens GN=IGHA1 PE=1 SV=2	CTRL-Rep-1	1201.7	37654	130	12	39.38		WLQGSQELPR	263	10	20	111.74	2	607.32
	CTRL-Rep-1	1201.7	37654	130	12	39.38		SAVQGPPER	168	9	19	115.43	2	470.741
	CTRL-Rep-1	1201.7	37654	130	12	39.38	Carbamidomethyl+C(4)	TFTCTAAYPESK	200	12	18	152.5	2	688.311
	CTRL-Rep-1	1201.7	37654	130	12	39.38		YLTWASR	275	7	9	59.22	2	448.733
	CTRL-Rep-1	1201.7	37654	130	12	39.38		QEPSQGTTTFAVTSILR	282	17	30	235.22	2	918.478
	CTRL-Rep-1	1201.7	37654	130	12	39.38		DASGVTFTWTPSSGK	153	15	24	246.1	2	770.866
	CTRL-Rep-1	1201.7	37654	130	12	39.38	Carbamidomethyl+C(3);Carbamidomethyl+C(5);Carbamidomethyl+C(15)	DLCGCYSVSSVLPGCAEPWNHGK	177	23	16	154.43	3	865.045
	CTRL-Rep-1	1201.7	37654	130	12	39.38		TPLTATLSK	212	9	10	97.76	2	466.274
	CTRL-Rep-1	1201.7	37654	130	12	39.38		VAAEDWK	299	7	7	56.21	2	409.705
	CTRL-Rep-1	1201.7	37654	130	12	39.38	Carbamidomethyl+C(26)	NFPPSQDASGDLYTTSSQLTLPATQCLAGK	51	30	7	23.71	3	1056.85
	CTRL-Rep-1	1201.7	37654	130	12	39.38	Carbamidomethyl+C(12);Carbamidomethyl+C(14);Carbamidomethyl+C(24)	SAVQGPPERDLCGCYSVSSVLPGCAEPWNHGK	168	32	7	18.59	4	879.4
	CTRL-Rep-1	1201.7	37654	130	12	39.38		PLTATLSK	213	8	1	9.81	2	415.749
	CTRL-Rep-3	1304.21	37654	143	13	39.38		TPLTATLSK	212	9	20	128.73	2	466.272
	CTRL-Rep-3	1304.21	37654	143	13	39.38		WLQGSQELPR	263	10	19	126.03	2	607.318
	CTRL-Rep-3	1304.21	37654	143	13	39.38		SAVQGPPER	168	9	20	114.23	2	470.742
	CTRL-Rep-3	1304.21	37654	143	13	39.38		YLTWASR	275	7	12	70.11	2	448.731
	CTRL-Rep-3	1304.21	37654	143	13	39.38	Carbamidomethyl+C(4)	TFTCTAAYPESK	200	12	20	119.64	2	688.312
	CTRL-Rep-3	1304.21	37654	143	13	39.38		QEPSQGTTTFAVTSILR	282	17	27	226.97	2	918.476
	CTRL-Rep-3	1304.21	37654	143	13	39.38	Carbamidomethyl+C(3);Carbamidomethyl+C(5);Carbamidomethyl+C(15)	DLCGCYSVSSVLPGCAEPWNHGK	177	23	22	208	3	865.044
	CTRL-Rep-3	1304.21	37654	143	13	39.38		DASGVTFTWTPSSGK	153	15	26	238.8	2	770.864
	CTRL-Rep-3	1304.21	37654	143	13	39.38		VAAEDWK	299	7	6	55.61	2	409.703
	CTRL-Rep-3	1304.21	37654	143	13	39.38	Carbamidomethyl+C(12);Carbamidomethyl+C(14);Carbamidomethyl+C(24)	SAVQGPPERDLCGCYSVSSVLPGCAEPWNHGK	168	32	9	38.25	4	879.403
	CTRL-Rep-3	1304.21	37654	143	13	39.38	Carbamidomethyl+C(26)	NFPPSQDASGDLYTTSSQLTLPATQCLAGK	51	30	6	19.12	3	1056.84
	CTRL-Rep-3	1304.21	37654	143	13	39.38	Carbamidomethyl+C(12);Carbamidomethyl+C(14);Carbamidomethyl+C(24)	SAVQGPPERDLCGCYSVSSVLPGCAEPWNHGK	168	32	3	18.06	5	703.723
	CTRL-Rep-3	1304.21	37654	143	13	39.38		YLTWASR	275	7	0	0.61	2	439.724
	CTRL-Rep-4	1154.04	37654	128	12	39.38		WLQGSQELPR	263	10	19	95.67	2	607.317
	CTRL-Rep-4	1154.04	37654	128	12	39.38		SAVQGPPER	168	9	21	128.24	2	470.741
	CTRL-Rep-4	1154.04	37654	128	12	39.38		YLTWASR	275	7	11	58.4	2	448.732
	CTRL-Rep-4	1154.04	37654	128	12	39.38	Carbamidomethyl+C(4)	TFTCTAAYPESK	200	12	23	167.73	2	688.311
	CTRL-Rep-4	1154.04	37654	128	12	39.38	Carbamidomethyl+C(3);Carbamidomethyl+C(5);Carbamidomethyl+C(15)	DLCGCYSVSSVLPGCAEPWNHGK	177	23	23	210.11	3	865.04
	CTRL-Rep-4	1154.04	37654	128	12	39.38		QEPSQGTTTFAVTSILR	282	17	25	188.53	2	918.474
	CTRL-Rep-4	1154.04	37654	128	12	39.38		DASGVTFTWTPSSGK	153	15	22	171.63	2	770.865
	CTRL-Rep-4	1154.04	37654	128	12	39.38		TPLTATLSK	212	9	8	73.46	2	466.273
	CTRL-Rep-4	1154.04	37654	128	12	39.38		VAAEDWK	299	7	6	43.95	2	409.702
	CTRL-Rep-4	1154.04	37654	128	12	39.38	Carbamidomethyl+C(12);Carbamidomethyl+C(14);Carbamidomethyl+C(24)	SAVQGPPERDLCGCYSVSSVLPGCAEPWNHGK	168	32	8	49.76	4	879.4
	CTRL-Rep-4	1154.04	37654	128	12	39.38	Carbamidomethyl+C(26)	NFPPSQDASGDLYTTSSQLTLPATQCLAGK	51	30	5	12.61	3	1056.85
	CTRL-Rep-4	1154.04	37654	128	12	39.38		PLTATLSK	213	8	0	1.23	2	415.748
	POAG-Rep-1	1158.55	37654	126	15	39.38		TPLTATLSK	212	9	19	148.54	2	466.276
	POAG-Rep-1	1158.55	37654	126	15	39.38		WLQGSQELPR	263	10	19	112.36	2	607.318
	POAG-Rep-1	1158.55	37654	126	15	39.38		SAVQGPPER	168	9	18	116.06	2	470.744
	POAG-Rep-1	1158.55	37654	126	15	39.38		YLTWASR	275	7	10	71.26	2	448.731
	POAG-Rep-1	1158.55	37654	126	15	39.38	Carbamidomethyl+C(4)	TFTCTAAYPESK	200	12	19	153.35	2	688.313
	POAG-Rep-1	1158.55	37654	126	15	39.38		QEPSQGTTTFAVTSILR	282	17	31	229.55	2	918.477
	POAG-Rep-1	1158.55	37654	126	15	39.38		DASGVTFTWTPSSGK	153	15	21	220.92	2	770.867
	POAG-Rep-1	1158.55	37654	126	15	39.38	Carbamidomethyl+C(3);Carbamidomethyl+C(5);Carbamidomethyl+C(15)	DLCGCYSVSSVLPGCAEPWNHGK	177	23	14	107.97	3	865.045
	POAG-Rep-1	1158.55	37654	126	15	39.38		VAAEDWK	299	7	3	41.78	1	818.399
	POAG-Rep-1	1158.55	37654	126	15	39.38	Carbamidomethyl+C(26)	NFPPSQDASGDLYTTSSQLTLPATQCLAGK	51	30	3	13	3	1056.85
	POAG-Rep-1	1158.55	37654	126	15	39.38	Carbamidomethyl+C(12);Carbamidomethyl+C(14);Carbamidomethyl+C(24)	SAVQGPPERDLCGCYSVSSVLPGCAEPWNHGK	168	32	3	12.53	4	879.401
	POAG-Rep-1	1158.55	37654	126	15	39.38		VQGPPER	170	7	1	9.87	2	391.708
	POAG-Rep-1	1158.55	37654	126	15	39.38		LTATLSK	214	7	1	9.87	1	733.44
	POAG-Rep-1	1158.55	37654	126	15	39.38		YLTWASR	275	7	0	0.57	2	439.727
	POAG-Rep-1	1158.55	37654	126	15	39.38		QEPSQGTTTFAVTSILR	282	17	0	3.44	3	606.647
	POAG-Rep-2	1067.02	37654	112	11	37.39		WLQGSQELPR	263	10	17	96.95	2	607.316
	POAG-Rep-2	1067.02	37654	112	11	37.39		TPLTATLSK	212	9	15	97.62	2	466.274
	POAG-Rep-2	1067.02	37654	112	11	37.39		SAVQGPPER	168	9	18	115.27	2	470.743
	POAG-Rep-2	1067.02	37654	112	11	37.39		YLTWASR	275	7	9	59.14	2	448.73
	POAG-Rep-2	1067.02	37654	112	11	37.39	Carbamidomethyl+C(4)	TFTCTAAYPESK	200	12	18	140.66	2	688.311
	POAG-Rep-2	1067.02	37654	112	11	37.39		QEPSQGTTTFAVTSILR	282	17	35	249.54	2	918.477
	POAG-Rep-2	1067.02	37654	112	11	37.39		DASGVTFTWTPSSGK	153	15	18	158.11	2	770.865
	POAG-Rep-2	1067.02	37654	112	11	37.39	Carbamidomethyl+C(3);Carbamidomethyl+C(5);Carbamidomethyl+C(15)	DLCGCYSVSSVLPGCAEPWNHGK	177	23	19	150.49	3	865.044
	POAG-Rep-2	1067.02	37654	112	11	37.39	Carbamidomethyl+C(26)	NFPPSQDASGDLYTTSSQLTLPATQCLAGK	51	30	5	19.43	3	1056.85
	POAG-Rep-2	1067.02	37654	112	11	37.39		YLTWASR	275	7	0	0.59	2	439.724
	POAG-Rep-2	1067.02	37654	112	11	37.39		QEPSQGTTTFAVTSILR	282	17	0	3.52	3	606.645
	POAG-Rep-4	1215.68	37654	153	13	50.42		WLQGSQELPR	263	10	18	111.32	2	607.318
	POAG-Rep-4	1215.68	37654	153	13	50.42		TPLTATLSK	212	9	18	147.22	2	466.273
	POAG-Rep-4	1215.68	37654	153	13	50.42		SAVQGPPER	168	9	24	147.22	2	470.742
	POAG-Rep-4	1215.68	37654	153	13	50.42		YLTWASR	275	7	10	59.01	2	448.731
	POAG-Rep-4	1215.68	37654	153	13	50.42	Carbamidomethyl+C(4)	TFTCTAAYPESK	200	12	20	162.71	2	688.31
	POAG-Rep-4	1215.68	37654	153	13	50.42		QEPSQGTTTFAVTSILR	282	17	33	227.8	2	918.476
	POAG-Rep-4	1215.68	37654	153	13	50.42		DASGVTFTWTPSSGK	153	15	19	169.58	2	770.862
	POAG-Rep-4	1215.68	37654	153	13	50.42	Carbamidomethyl+C(3);Carbamidomethyl+C(5);Carbamidomethyl+C(15)	DLCGCYSVSSVLPGCAEPWNHGK	177	23	19	148.57	3	865.044
	POAG-Rep-4	1215.68	37654	153	13	50.42		VAAEDWK	299	7	6	44.4	2	409.704
	POAG-Rep-4	1215.68	37654	153	13	50.42	Carbamidomethyl+C(4)	SVTCHVK	81	7	8	70.6	2	415.709
	POAG-Rep-4	1215.68	37654	153	13	50.42	Carbamidomethyl+C(29)	SGNTFRPEVHLLPPPSEELALNELVTLTCLAR	221	32	17	182.81	5	715.573
	POAG-Rep-4	1215.68	37654	153	13	50.42	Carbamidomethyl+C(26)	NFPPSQDASGDLYTTSSQLTLPATQCLAGK	51	30	6	23.52	3	1056.84
	POAG-Rep-4	1215.68	37654	153	13	50.42	Carbamidomethyl+C(12);Carbamidomethyl+C(14);Carbamidomethyl+C(24)	SAVQGPPERDLCGCYSVSSVLPGCAEPWNHGK	168	32	5	16.16	4	879.399
sp|P01877|IGHA2_HUMAN Ig alpha-2 chain C region OS=Homo sapiens GN=IGHA2 PE=1 SV=3	CTRL-Rep-1	937.22	36526	119	18	40.29		WLQGSQELPR	250	10	20	111.74	2	607.32
	CTRL-Rep-1	937.22	36526	119	18	40.29		SAVQGPPER	155	9	19	115.43	2	470.741
	CTRL-Rep-1	937.22	36526	119	18	40.29		YLTWASR	262	7	9	59.22	2	448.733
	CTRL-Rep-1	937.22	36526	119	18	40.29		QEPSQGTTTFAVTSILR	269	17	30	235.22	2	918.478
	CTRL-Rep-1	937.22	36526	119	18	40.29	Carbamidomethyl+C(13);Carbamidomethyl+C(21);Carbamidomethyl+C(22)	HYTNPSQDVTVPCPVPPPPPCCHPR	88	25	19	144.66	4	728.082
	CTRL-Rep-1	937.22	36526	119	18	40.29		DASGATFTWTPSSGK	140	15	14	145.59	2	756.853
	CTRL-Rep-1	937.22	36526	119	18	40.29	Carbamidomethyl+C(3);Carbamidomethyl+C(5);Carbamidomethyl+C(15);Carbamidomethyl+C(27)	DLCGCYSVSSVLPGCAQPWNHGETFTCTAAHPELK	164	35	18	117.97	4	988.188
	CTRL-Rep-1	937.22	36526	119	18	40.29		VAAEDWK	286	7	7	56.21	2	409.705
	CTRL-Rep-1	937.22	36526	119	18	40.29		DVLVR	245	5	2	29.32	1	601.36
	CTRL-Rep-1	937.22	36526	119	18	40.29	Carbamidomethyl+C(4)	SVTCHVK	81	7	7	70.87	2	415.708
	CTRL-Rep-1	937.22	36526	119	18	40.29	Carbamidomethyl+C(2);Carbamidomethyl+C(10);Carbamidomethyl+C(11)	PCPVPPPPPCCHPR	99	14	3	24.96	3	556.591
	CTRL-Rep-1	937.22	36526	119	18	40.29		VQGPPER	157	7	2	9.81	2	391.707
	CTRL-Rep-1	937.22	36526	119	18	40.29	Carbamidomethyl+C(6);Carbamidomethyl+C(7)	PPPPPCCHPR	103	10	1	7.49	2	607.783
	CTRL-Rep-1	937.22	36526	119	18	40.29	Carbamidomethyl+C(4);Carbamidomethyl+C(12);Carbamidomethyl+C(13)	TVPCPVPPPPPCCHPR	97	16	0	5.84	2	934.446
	CTRL-Rep-1	937.22	36526	119	18	40.29		AVQGPPER	156	8	1	9.81	2	427.226
	CTRL-Rep-1	937.22	36526	119	18	40.29		YLTWASR	262	7	0	0.58	2	439.726
	CTRL-Rep-1	937.22	36526	119	18	40.29		SAVQGPPER	155	9	0	1.17	2	462.236
	CTRL-Rep-1	937.22	36526	119	18	40.29		QEPSQGTTTFAVTSILR	269	17	3	7.37	3	606.651
	CTRL-Rep-3	907.3	36526	119	18	49.12		WLQGSQELPR	250	10	19	126.03	2	607.318
	CTRL-Rep-3	907.3	36526	119	18	49.12		SAVQGPPER	155	9	20	114.23	2	470.742
	CTRL-Rep-3	907.3	36526	119	18	49.12		YLTWASR	262	7	12	70.11	2	448.731
	CTRL-Rep-3	907.3	36526	119	18	49.12		QEPSQGTTTFAVTSILR	269	17	27	226.97	2	918.476
	CTRL-Rep-3	907.3	36526	119	18	49.12	Carbamidomethyl+C(13);Carbamidomethyl+C(21);Carbamidomethyl+C(22)	HYTNPSQDVTVPCPVPPPPPCCHPR	88	25	23	150.48	4	728.081
	CTRL-Rep-3	907.3	36526	119	18	49.12		DASGATFTWTPSSGK	140	15	17	164.52	2	756.849
	CTRL-Rep-3	907.3	36526	119	18	49.12	Carbamidomethyl+C(3);Carbamidomethyl+C(5);Carbamidomethyl+C(15);Carbamidomethyl+C(27)	DLCGCYSVSSVLPGCAQPWNHGETFTCTAAHPELK	164	35	8	43.35	4	988.186
	CTRL-Rep-3	907.3	36526	119	18	49.12		VAAEDWK	286	7	6	55.61	2	409.703
	CTRL-Rep-3	907.3	36526	119	18	49.12	Carbamidomethyl+C(4)	SVTCHVK	81	7	8	70.11	2	415.71
	CTRL-Rep-3	907.3	36526	119	18	49.12		DVLVR	245	5	2	29.01	1	601.361
	CTRL-Rep-3	907.3	36526	119	18	49.12	Carbamidomethyl+C(26)	NFPPSQDASGDLYTTSSQLTLPATQCPDGK	51	30	5	19.12	3	1066.17
	CTRL-Rep-3	907.3	36526	119	18	49.12	Carbamidomethyl+C(2);Carbamidomethyl+C(10);Carbamidomethyl+C(11)	PCPVPPPPPCCHPR	99	14	3	37.01	3	556.589
	CTRL-Rep-3	907.3	36526	119	18	49.12		VQGPPER	157	7	1	9.69	2	391.709
	CTRL-Rep-3	907.3	36526	119	18	49.12	Carbamidomethyl+C(6);Carbamidomethyl+C(7)	PPPPPCCHPR	103	10	0	6.05	2	607.783
	CTRL-Rep-3	907.3	36526	119	18	49.12		AVQGPPER	156	8	1	9.69	2	427.225
	CTRL-Rep-3	907.3	36526	119	18	49.12	Carbamidomethyl+C(3);Carbamidomethyl+C(11);Carbamidomethyl+C(12)	VPCPVPPPPPCCHPR	98	15	0	6.05	3	589.613
	CTRL-Rep-3	907.3	36526	119	18	49.12	Carbamidomethyl+C(3);Carbamidomethyl+C(15)	PGCAQPWNHGETFTCTAAHPELK	176	23	1	8.81	3	870.4
	CTRL-Rep-3	907.3	36526	119	18	49.12		QEPSQGTTTFAVTSILR	269	17	0	3.63	3	606.649
	CTRL-Rep-4	898.61	36526	119	18	42.94		WLQGSQELPR	250	10	19	95.67	2	607.317
	CTRL-Rep-4	898.61	36526	119	18	42.94		SAVQGPPER	155	9	21	128.24	2	470.741
	CTRL-Rep-4	898.61	36526	119	18	42.94		YLTWASR	262	7	11	58.4	2	448.732
	CTRL-Rep-4	898.61	36526	119	18	42.94		QEPSQGTTTFAVTSILR	269	17	25	188.53	2	918.474
	CTRL-Rep-4	898.61	36526	119	18	42.94	Carbamidomethyl+C(13);Carbamidomethyl+C(21);Carbamidomethyl+C(22)	HYTNPSQDVTVPCPVPPPPPCCHPR	88	25	24	191.19	4	728.081
	CTRL-Rep-4	898.61	36526	119	18	42.94		DASGATFTWTPSSGK	140	15	17	175.31	2	756.852
	CTRL-Rep-4	898.61	36526	119	18	42.94	Carbamidomethyl+C(3);Carbamidomethyl+C(5);Carbamidomethyl+C(15);Carbamidomethyl+C(27)	DLCGCYSVSSVLPGCAQPWNHGETFTCTAAHPELK	164	35	10	44.44	4	988.185
	CTRL-Rep-4	898.61	36526	119	18	42.94		VAAEDWK	286	7	6	43.95	2	409.702
	CTRL-Rep-4	898.61	36526	119	18	42.94		TPLTANITK	199	9	4	33.77	2	479.781
	CTRL-Rep-4	898.61	36526	119	18	42.94		DVLVR	245	5	2	28.89	1	601.36
	CTRL-Rep-4	898.61	36526	119	18	42.94	Carbamidomethyl+C(4)	SVTCHVK	81	7	8	69.84	2	415.707
	CTRL-Rep-4	898.61	36526	119	18	42.94	Carbamidomethyl+C(2);Carbamidomethyl+C(10);Carbamidomethyl+C(11)	PCPVPPPPPCCHPR	99	14	3	36.92	3	556.59
	CTRL-Rep-4	898.61	36526	119	18	42.94	Carbamidomethyl+C(6);Carbamidomethyl+C(7)	PPPPPCCHPR	103	10	0	6.13	2	607.784
	CTRL-Rep-4	898.61	36526	119	18	42.94	Carbamidomethyl+C(4);Carbamidomethyl+C(12);Carbamidomethyl+C(13)	TVPCPVPPPPPCCHPR	97	16	0	6.13	2	934.444
	CTRL-Rep-4	898.61	36526	119	18	42.94	Carbamidomethyl+C(3);Carbamidomethyl+C(11);Carbamidomethyl+C(12)	VPCPVPPPPPCCHPR	98	15	0	6.13	3	589.614
	CTRL-Rep-4	898.61	36526	119	18	42.94		YLTWASR	262	7	0	0.61	2	439.724
	CTRL-Rep-4	898.61	36526	119	18	42.94		SAVQGPPER	155	9	0	1.23	2	462.234
	CTRL-Rep-4	898.61	36526	119	18	42.94		QEPSQGTTTFAVTSILR	269	17	4	15.17	3	606.644
	POAG-Rep-1	1000.05	36526	137	15	50.88		WLQGSQELPR	250	10	19	112.36	2	607.318
	POAG-Rep-1	1000.05	36526	137	15	50.88		SAVQGPPER	155	9	18	116.06	2	470.744
	POAG-Rep-1	1000.05	36526	137	15	50.88		YLTWASR	262	7	10	71.26	2	448.731
	POAG-Rep-1	1000.05	36526	137	15	50.88		QEPSQGTTTFAVTSILR	269	17	31	229.55	2	918.477
	POAG-Rep-1	1000.05	36526	137	15	50.88	Carbamidomethyl+C(13);Carbamidomethyl+C(21);Carbamidomethyl+C(22)	HYTNPSQDVTVPCPVPPPPPCCHPR	88	25	22	201.41	4	728.082
	POAG-Rep-1	1000.05	36526	137	15	50.88		DASGATFTWTPSSGK	140	15	18	169.75	2	756.849
	POAG-Rep-1	1000.05	36526	137	15	50.88	Carbamidomethyl+C(3);Carbamidomethyl+C(5);Carbamidomethyl+C(15);Carbamidomethyl+C(27)	DLCGCYSVSSVLPGCAQPWNHGETFTCTAAHPELK	164	35	15	102.49	4	988.189
	POAG-Rep-1	1000.05	36526	137	15	50.88		VAAEDWK	286	7	3	41.78	1	818.399
	POAG-Rep-1	1000.05	36526	137	15	50.88		DVLVR	245	5	2	29.48	1	601.36
	POAG-Rep-1	1000.05	36526	137	15	50.88	Carbamidomethyl+C(4)	SVTCHVK	81	7	8	71.26	2	415.71
	POAG-Rep-1	1000.05	36526	137	15	50.88	Carbamidomethyl+C(29)	SGNTFRPEVHLLPPPSEELALNELVTLTCLAR	208	32	20	189.8	5	715.571
	POAG-Rep-1	1000.05	36526	137	15	50.88		TIDR	314	4	2	14.45	1	504.276
	POAG-Rep-1	1000.05	36526	137	15	50.88	Carbamidomethyl+C(2);Carbamidomethyl+C(10);Carbamidomethyl+C(11)	PCPVPPPPPCCHPR	99	14	4	40.35	3	556.59
	POAG-Rep-1	1000.05	36526	137	15	50.88	Carbamidomethyl+C(6);Carbamidomethyl+C(7)	PPPPPCCHPR	103	10	1	7.47	2	607.786
	POAG-Rep-1	1000.05	36526	137	15	50.88	Carbamidomethyl+C(4);Carbamidomethyl+C(12);Carbamidomethyl+C(13)	TVPCPVPPPPPCCHPR	97	16	0	5.74	2	934.453
	POAG-Rep-2	957.51	36526	139	19	58.53		WLQGSQELPR	250	10	17	96.95	2	607.316
	POAG-Rep-2	957.51	36526	139	19	58.53		SAVQGPPER	155	9	18	115.27	2	470.743
	POAG-Rep-2	957.51	36526	139	19	58.53		YLTWASR	262	7	9	59.14	2	448.73
	POAG-Rep-2	957.51	36526	139	19	58.53		QEPSQGTTTFAVTSILR	269	17	35	249.54	2	918.477
	POAG-Rep-2	957.51	36526	139	19	58.53	Carbamidomethyl+C(13);Carbamidomethyl+C(21);Carbamidomethyl+C(22)	HYTNPSQDVTVPCPVPPPPPCCHPR	88	25	26	199.62	4	728.08
	POAG-Rep-2	957.51	36526	139	19	58.53		DASGATFTWTPSSGK	140	15	18	175.76	2	756.851
	POAG-Rep-2	957.51	36526	139	19	58.53	Carbamidomethyl+C(3);Carbamidomethyl+C(5);Carbamidomethyl+C(15);Carbamidomethyl+C(27)	DLCGCYSVSSVLPGCAQPWNHGETFTCTAAHPELK	164	35	14	97.94	4	988.188
	POAG-Rep-2	957.51	36526	139	19	58.53	Carbamidomethyl+C(26)	NFPPSQDASGDLYTTSSQLTLPATQCPDGK	51	30	3	18.77	3	1066.16
	POAG-Rep-2	957.51	36526	139	19	58.53		VAAEDWK	286	7	4	56.13	2	409.7
	POAG-Rep-2	957.51	36526	139	19	58.53		DVLVR	245	5	2	29.28	1	601.362
	POAG-Rep-2	957.51	36526	139	19	58.53	Carbamidomethyl+C(4)	SVTCHVK	81	7	7	70.77	2	415.71
	POAG-Rep-2	957.51	36526	139	19	58.53	Carbamidomethyl+C(29)	SGNTFRPEVHLLPPPSEELALNELVTLTCLAR	208	32	19	230.63	5	715.569
	POAG-Rep-2	957.51	36526	139	19	58.53	Carbamidomethyl+C(2);Carbamidomethyl+C(10);Carbamidomethyl+C(11)	PCPVPPPPPCCHPR	99	14	3	37.23	3	556.589
	POAG-Rep-2	957.51	36526	139	19	58.53	Carbamidomethyl+C(6);Carbamidomethyl+C(7)	PPPPPCCHPR	103	10	0	5.87	2	607.781
	POAG-Rep-2	957.51	36526	139	19	58.53		VQGPPER	157	7	1	9.79	2	391.708
	POAG-Rep-2	957.51	36526	139	19	58.53		AVQGPPER	156	8	0	1.17	2	427.226
	POAG-Rep-2	957.51	36526	139	19	58.53	Carbamidomethyl+C(3);Carbamidomethyl+C(15)	PGCAQPWNHGETFTCTAAHPELK	176	23	1	8.67	3	870.4
	POAG-Rep-2	957.51	36526	139	19	58.53	Carbamidomethyl+C(3);Carbamidomethyl+C(11);Carbamidomethyl+C(12)	VPCPVPPPPPCCHPR	98	15	0	5.87	3	589.616
	POAG-Rep-2	957.51	36526	139	19	58.53		SAVQGPPER	155	9	0	1.17	2	462.236
	POAG-Rep-4	979.34	36526	113	16	36.76		WLQGSQELPR	250	10	18	111.32	2	607.318
	POAG-Rep-4	979.34	36526	113	16	36.76		SAVQGPPER	155	9	24	147.22	2	470.742
	POAG-Rep-4	979.34	36526	113	16	36.76		YLTWASR	262	7	10	59.01	2	448.731
	POAG-Rep-4	979.34	36526	113	16	36.76		QEPSQGTTTFAVTSILR	269	17	33	227.8	2	918.476
	POAG-Rep-4	979.34	36526	113	16	36.76	Carbamidomethyl+C(13);Carbamidomethyl+C(21);Carbamidomethyl+C(22)	HYTNPSQDVTVPCPVPPPPPCCHPR	88	25	28	219.38	4	728.082
	POAG-Rep-4	979.34	36526	113	16	36.76		DASGATFTWTPSSGK	140	15	13	128.66	2	756.851
	POAG-Rep-4	979.34	36526	113	16	36.76	Carbamidomethyl+C(3);Carbamidomethyl+C(5);Carbamidomethyl+C(15);Carbamidomethyl+C(27)	DLCGCYSVSSVLPGCAQPWNHGETFTCTAAHPELK	164	35	12	78.48	4	988.186
	POAG-Rep-4	979.34	36526	113	16	36.76		VAAEDWK	286	7	6	44.4	2	409.704
	POAG-Rep-4	979.34	36526	113	16	36.76	Carbamidomethyl+C(2);Carbamidomethyl+C(10);Carbamidomethyl+C(11)	PCPVPPPPPCCHPR	99	14	4	39.99	3	556.591
	POAG-Rep-4	979.34	36526	113	16	36.76		VQGPPER	157	7	2	9.77	2	391.707
	POAG-Rep-4	979.34	36526	113	16	36.76	Carbamidomethyl+C(6);Carbamidomethyl+C(7)	PPPPPCCHPR	103	10	1	7.51	2	607.783
	POAG-Rep-4	979.34	36526	113	16	36.76	Carbamidomethyl+C(4);Carbamidomethyl+C(12);Carbamidomethyl+C(13)	TVPCPVPPPPPCCHPR	97	16	0	5.92	2	934.442
	POAG-Rep-4	979.34	36526	113	16	36.76	Carbamidomethyl+C(3);Carbamidomethyl+C(11);Carbamidomethyl+C(12)	VPCPVPPPPPCCHPR	98	15	1	7.51	3	589.611
	POAG-Rep-4	979.34	36526	113	16	36.76		YLTWASR	262	7	0	0.59	2	439.725
	POAG-Rep-4	979.34	36526	113	16	36.76		SAVQGPPER	155	9	0	1.18	2	462.233
	POAG-Rep-4	979.34	36526	113	16	36.76		QEPSQGTTTFAVTSILR	269	17	2	7.36	3	606.645
sp|P01857|IGHG1_HUMAN Ig gamma-1 chain C region OS=Homo sapiens GN=IGHG1 PE=1 SV=1	CTRL-Rep-1	302.29	36105	61	11	40.3		FNWYVDGVEVHNAK	157	14	16	112.3	3	559.934
	CTRL-Rep-1	302.29	36105	61	11	40.3	Carbamidomethyl+C(6)	TPEVTCVVVDVSHEDPEVK	138	19	6	45.32	3	713.678
	CTRL-Rep-1	302.29	36105	61	11	40.3	Carbamidomethyl+C(7)	NQVSLTCLVK	243	10	7	37.66	2	581.318
	CTRL-Rep-1	302.29	36105	61	11	40.3	Carbamidomethyl+C(11)	STSGGTAALGCLVK	16	14	14	61.34	2	661.344
	CTRL-Rep-1	302.29	36105	61	11	40.3	Carbamidomethyl+C(9)	WQQGNVFSCSVMHEALHNHYTQK	299	23	7	40.52	4	701.065
	CTRL-Rep-1	302.29	36105	61	11	40.3		TTPPVLDSDGSFFLYSK	275	17	5	26.69	2	937.466
	CTRL-Rep-1	302.29	36105	61	11	40.3		VVSVLTVLHQDWLNGK	184	16	7	55.05	3	603.333
	CTRL-Rep-1	302.29	36105	61	11	40.3		GPSVFPLAPSSK	4	12	4	25.81	2	593.826
	CTRL-Rep-1	302.29	36105	61	11	40.3		ALPAPIEK	209	8	3	44.85	2	419.75
	CTRL-Rep-1	302.29	36105	61	11	40.3		WYVDGVEVHNAK	159	12	3	31.16	2	708.843
	CTRL-Rep-1	302.29	36105	61	11	40.3		VVDVSHEDPEVK	145	12	0	4.09	3	451.565
	CTRL-Rep-3	381.31	36105	59	10	36.97		FNWYVDGVEVHNAK	157	14	15	111.01	3	559.934
	CTRL-Rep-3	381.31	36105	59	10	36.97	Carbamidomethyl+C(6)	TPEVTCVVVDVSHEDPEVK	138	19	10	69.06	3	713.675
	CTRL-Rep-3	381.31	36105	59	10	36.97	Carbamidomethyl+C(7)	NQVSLTCLVK	243	10	8	37.24	2	581.317
	CTRL-Rep-3	381.31	36105	59	10	36.97	Carbamidomethyl+C(4);Carbamidomethyl+C(7)	THTCPPCPAPELLGGPSVFLFPPKPK	105	26	6	26.22	4	711.862
	CTRL-Rep-3	381.31	36105	59	10	36.97	Carbamidomethyl+C(11)	STSGGTAALGCLVK	16	14	11	101.43	2	661.341
	CTRL-Rep-3	381.31	36105	59	10	36.97		TTPPVLDSDGSFFLYSK	275	17	7	41.34	2	937.468
	CTRL-Rep-3	381.31	36105	59	10	36.97		GFYPSDIAVEWESNGQPENNYK	253	22	5	32.78	3	848.715
	CTRL-Rep-3	381.31	36105	59	10	36.97		WYVDGVEVHNAK	159	12	1	7.68	2	708.848
	CTRL-Rep-3	381.31	36105	59	10	36.97		VVDVSHEDPEVK	145	12	3	26.54	3	451.56
	CTRL-Rep-3	381.31	36105	59	10	36.97		FNWYVDGVEVHNAK	157	14	0	2.72	3	554.257
	CTRL-Rep-4	343.19	36105	63	14	50.3		FNWYVDGVEVHNAK	157	14	17	124	3	559.935
	CTRL-Rep-4	343.19	36105	63	14	50.3	Carbamidomethyl+C(6)	TPEVTCVVVDVSHEDPEVK	138	19	7	50.96	3	713.679
	CTRL-Rep-4	343.19	36105	63	14	50.3	Carbamidomethyl+C(4);Carbamidomethyl+C(7)	THTCPPCPAPELLGGPSVFLFPPKPK	105	26	8	21.14	4	711.862
	CTRL-Rep-4	343.19	36105	63	14	50.3	Carbamidomethyl+C(11)	STSGGTAALGCLVK	16	14	9	61.98	2	661.34
	CTRL-Rep-4	343.19	36105	63	14	50.3		GPSVFPLAPSSK	4	12	5	44.37	2	593.826
	CTRL-Rep-4	343.19	36105	63	14	50.3		ALPAPIEK	209	8	6	44.26	2	419.752
	CTRL-Rep-4	343.19	36105	63	14	50.3		VVSVLTVLHQDWLNGK	184	16	6	54.14	3	603.331
	CTRL-Rep-4	343.19	36105	63	14	50.3	Carbamidomethyl+C(7)	NQVSLTCLVK	243	10	3	37.09	2	581.317
	CTRL-Rep-4	343.19	36105	63	14	50.3		TTPPVLDSDGSFFLYSK	275	17	3	18.82	2	937.468
	CTRL-Rep-4	343.19	36105	63	14	50.3		GFYPSDIAVEWESNGQPENNYK	253	22	4	25.33	3	848.715
	CTRL-Rep-4	343.19	36105	63	14	50.3	Carbamidomethyl+C(6)	VEPKSCDK	97	8	3	39.49	2	481.733
	CTRL-Rep-4	343.19	36105	63	14	50.3		WYVDGVEVHNAK	159	12	2	17.18	2	708.851
	CTRL-Rep-4	343.19	36105	63	14	50.3		GGPSVFLFPPKPK	118	13	0	6.44	2	685.889
	CTRL-Rep-4	343.19	36105	63	14	50.3		FNWYVDGVEVHNAK	157	14	2	7.66	3	554.261
	POAG-Rep-1	286.98	36105	40	6	28.48		FNWYVDGVEVHNAK	157	14	12	78.28	3	559.934
	POAG-Rep-1	286.98	36105	40	6	28.48	Carbamidomethyl+C(6)	TPEVTCVVVDVSHEDPEVK	138	19	11	90.27	3	713.678
	POAG-Rep-1	286.98	36105	40	6	28.48	Carbamidomethyl+C(4);Carbamidomethyl+C(7)	THTCPPCPAPELLGGPSVFLFPPKPK	105	26	4	24.9	4	711.864
	POAG-Rep-1	286.98	36105	40	6	28.48	Carbamidomethyl+C(11)	STSGGTAALGCLVK	16	14	6	30.57	2	661.344
	POAG-Rep-1	286.98	36105	40	6	28.48	Carbamidomethyl+C(7)	NQVSLTCLVK	243	10	8	60.39	2	581.318
	POAG-Rep-1	286.98	36105	40	6	28.48		EPQVYTLPPSR	227	11	3	39.92	2	643.831
	POAG-Rep-4	202.06	36105	36	8	22.42		FNWYVDGVEVHNAK	157	14	13	102.17	3	559.933
	POAG-Rep-4	202.06	36105	36	8	22.42	Carbamidomethyl+C(7)	NQVSLTCLVK	243	10	3	37.51	2	581.314
	POAG-Rep-4	202.06	36105	36	8	22.42		GPSVFPLAPSSK	4	12	5	25.67	2	593.825
	POAG-Rep-4	202.06	36105	36	8	22.42		VVSVLTVLHQDWLNGK	184	16	5	63.05	3	603.333
	POAG-Rep-4	202.06	36105	36	8	22.42	Carbamidomethyl+C(11)	STSGGTAALGCLVK	16	14	5	46.31	2	661.344
	POAG-Rep-4	202.06	36105	36	8	22.42		ALPAPIEK	209	8	5	69.13	2	419.75
	POAG-Rep-4	202.06	36105	36	8	22.42	Phosphoryl STY(9)	GQPREPQVYTLPPSR	223	15	3	21.21	3	602.299
	POAG-Rep-4	202.06	36105	36	8	22.42		WYVDGVEVHNAK	159	12	2	17.4	2	708.852
sp|P01859|IGHG2_HUMAN Ig gamma-2 chain C region OS=Homo sapiens GN=IGHG2 PE=1 SV=2	CTRL-Rep-1	162.87	35900	31	6	25.77	Carbamidomethyl+C(7)	NQVSLTCLVK	239	10	7	37.66	2	581.318
	CTRL-Rep-1	162.87	35900	31	6	25.77	Carbamidomethyl+C(10)	GPSVFPLAPCSR	4	12	6	49.89	2	644.33
	CTRL-Rep-1	162.87	35900	31	6	25.77	Carbamidomethyl+C(11)	STSESTAALGCLVK	16	14	6	22.59	2	712.36
	CTRL-Rep-1	162.87	35900	31	6	25.77	Carbamidomethyl+C(9)	WQQGNVFSCSVMHEALHNHYTQK	295	23	7	40.52	4	701.065
	CTRL-Rep-1	162.87	35900	31	6	25.77		VVSVLTVVHQDWLNGK	180	16	4	43.4	3	598.663
	CTRL-Rep-1	162.87	35900	31	6	25.77		EEQFNSTFR	171	9	3	34.35	2	579.268
	CTRL-Rep-3	217.74	35900	28	4	15.95	Carbamidomethyl+C(7)	NQVSLTCLVK	239	10	8	37.24	2	581.317
	CTRL-Rep-3	217.74	35900	28	4	15.95	Carbamidomethyl+C(10)	GPSVFPLAPCSR	4	12	8	86.13	2	644.331
	CTRL-Rep-3	217.74	35900	28	4	15.95		VVSVLTVVHQDWLNGK	180	16	6	55.64	3	598.663
	CTRL-Rep-3	217.74	35900	28	4	15.95	Carbamidomethyl+C(11)	STSESTAALGCLVK	16	14	7	45.33	2	712.356
	CTRL-Rep-4	142.56	35900	12	3	8.59		VVSVLTVVHQDWLNGK	180	16	4	27.47	3	598.663
	CTRL-Rep-4	142.56	35900	12	3	8.59	Carbamidomethyl+C(10)	GPSVFPLAPCSR	4	12	8	83.73	2	644.332
	CTRL-Rep-4	142.56	35900	12	3	8.59	Carbamidomethyl+C(10)	GPSVFPLAPCSR	4	12	0	2.15	2	635.314
	POAG-Rep-1	153.71	35900	22	5	17.79	Carbamidomethyl+C(7)	NQVSLTCLVK	239	10	8	60.39	2	581.318
	POAG-Rep-1	153.71	35900	22	5	17.79	Carbamidomethyl+C(10)	GPSVFPLAPCSR	4	12	5	70.94	2	644.33
	POAG-Rep-1	153.71	35900	22	5	17.79	Carbamidomethyl+C(11)	STSESTAALGCLVK	16	14	4	22.79	2	712.359
	POAG-Rep-1	153.71	35900	22	5	17.79		TTPPMLDSDGSFFLYSK	271	17	3	26.87	2	953.463
	POAG-Rep-1	153.71	35900	22	5	17.79	Carbamidomethyl+C(12)	EEMTKNQVSLTCLVK	234	15	3	38.06	3	593.972
sp|P01860|IGHG3_HUMAN Ig gamma-3 chain C region OS=Homo sapiens GN=IGHG3 PE=1 SV=2	CTRL-Rep-1	172.18	41287	33	7	16.18	Carbamidomethyl+C(7)	NQVSLTCLVK	290	10	7	37.66	2	581.318
	CTRL-Rep-1	172.18	41287	33	7	16.18	Carbamidomethyl+C(11)	STSGGTAALGCLVK	16	14	14	61.34	2	661.344
	CTRL-Rep-1	172.18	41287	33	7	16.18	Carbamidomethyl+C(10)	GPSVFPLAPCSR	4	12	6	49.89	2	644.33
	CTRL-Rep-1	172.18	41287	33	7	16.18		FTQK	365	4	2	14.37	1	523.284
	CTRL-Rep-1	172.18	41287	33	7	16.18		VELK	97	4	1	14.37	1	488.305
	CTRL-Rep-1	172.18	41287	33	7	16.18	Carbamidomethyl+C(10);Carbamidomethyl+C(13)	TPLGDTTHTCPRCPEPK	101	17	4	52.6	4	492.488
	CTRL-Rep-1	172.18	41287	33	7	16.18	Phosphoryl STY()	GQPREPQVYTLPPSR	270	15	5	36.45	3	602.297
	CTRL-Rep-3	260.49	41287	42	9	17.51	Carbamidomethyl+C(7)	NQVSLTCLVK	290	10	8	37.24	2	581.317
	CTRL-Rep-3	260.49	41287	42	9	17.51	Carbamidomethyl+C(11)	STSGGTAALGCLVK	16	14	11	101.43	2	661.341
	CTRL-Rep-3	260.49	41287	42	9	17.51	Carbamidomethyl+C(10)	GPSVFPLAPCSR	4	12	8	86.13	2	644.331
	CTRL-Rep-3	260.49	41287	42	9	17.51	Carbamidomethyl+C(10)	TPLGDTTHTCPR	101	12	8	36.61	3	452.545
	CTRL-Rep-3	260.49	41287	42	9	17.51		FTQK	365	4	1	14.2	1	523.283
	CTRL-Rep-3	260.49	41287	42	9	17.51		EEMTK	285	5	1	14.5	2	319.144
	CTRL-Rep-3	260.49	41287	42	9	17.51	Carbamidomethyl+C(12)	EEMTKNQVSLTCLVK	285	15	3	29.06	2	890.452
	CTRL-Rep-3	260.49	41287	42	9	17.51	Carbamidomethyl+C(14)	ASTKGPSVFPLAPCSR	0	16	3	19.89	3	558.953
	CTRL-Rep-3	260.49	41287	42	9	17.51	Carbamidomethyl+C(10);Carbamidomethyl+C(13)	TPLGDTTHTCPRCPEPK	101	17	4	27.6	4	492.487
	CTRL-Rep-4	216.92	41287	21	4	10.08	Carbamidomethyl+C(10)	GPSVFPLAPCSR	4	12	8	83.73	2	644.332
	CTRL-Rep-4	216.92	41287	21	4	10.08	Carbamidomethyl+C(11)	STSGGTAALGCLVK	16	14	9	61.98	2	661.34
	CTRL-Rep-4	216.92	41287	21	4	10.08		ALPAPIEK	256	8	6	44.26	2	419.752
	CTRL-Rep-4	216.92	41287	21	4	10.08		VELK	97	4	1	14.14	1	488.307
sp|P01861|IGHG4_HUMAN Ig gamma-4 chain C region OS=Homo sapiens GN=IGHG4 PE=1 SV=1	CTRL-Rep-1	112.35	35940	20	4	16.21	Carbamidomethyl+C(7)	NQVSLTCLVK	240	10	7	37.66	2	581.318
	CTRL-Rep-1	112.35	35940	20	4	16.21	Carbamidomethyl+C(10)	GPSVFPLAPCSR	4	12	6	49.89	2	644.33
	CTRL-Rep-1	112.35	35940	20	4	16.21	Carbamidomethyl+C(11)	STSESTAALGCLVK	16	14	6	22.59	2	712.36
	CTRL-Rep-1	112.35	35940	20	4	16.21		TTPPVLDSDGSFFLYSR	272	17	3	19.29	4	476.234
	CTRL-Rep-3	201.24	35940	36	6	27.83	Carbamidomethyl+C(7)	NQVSLTCLVK	240	10	8	37.24	2	581.317
	CTRL-Rep-3	201.24	35940	36	6	27.83	Carbamidomethyl+C(10)	GPSVFPLAPCSR	4	12	8	86.13	2	644.331
	CTRL-Rep-3	201.24	35940	36	6	27.83	Carbamidomethyl+C(11)	STSESTAALGCLVK	16	14	7	45.33	2	712.356
	CTRL-Rep-3	201.24	35940	36	6	27.83		GFYPSDIAVEWESNGQPENNYK	250	22	5	32.78	3	848.715
	CTRL-Rep-3	201.24	35940	36	6	27.83		VVSVLTVLHQDWLNGK	181	16	6	70.81	3	603.331
	CTRL-Rep-3	201.24	35940	36	6	27.83		TTPPVLDSDGSFFLYSR	272	17	4	18.95	2	951.467
	POAG-Rep-1	161.06	35940	30	6	25.99	Carbamidomethyl+C(7)	NQVSLTCLVK	240	10	8	60.39	2	581.318
	POAG-Rep-1	161.06	35940	30	6	25.99	Carbamidomethyl+C(10)	GPSVFPLAPCSR	4	12	5	70.94	2	644.33
	POAG-Rep-1	161.06	35940	30	6	25.99	Carbamidomethyl+C(11)	STSESTAALGCLVK	16	14	4	22.79	2	712.359
	POAG-Rep-1	161.06	35940	30	6	25.99		VVSVLTVLHQDWLNGK	181	16	6	76.82	3	603.331
	POAG-Rep-1	161.06	35940	30	6	25.99		TTPPVLDSDGSFFLYSR	272	17	6	40.19	3	634.653
	POAG-Rep-1	161.06	35940	30	6	25.99		EPQVYTLPPSQEEMTK	224	16	4	20.43	2	938.968
sp|P01591|IGJ_HUMAN Immunoglobulin J chain OS=Homo sapiens GN=IGJ PE=1 SV=4	CTRL-Rep-1	386.36	18098	51	8	44.65		SSEDPNEDIVER	46	12	16	110.86	2	695.309
	CTRL-Rep-1	386.36	18098	51	8	44.65	Carbamidomethyl+C(1)	CYTAVVPLVYGGETK	130	15	21	162.59	2	828.915
	CTRL-Rep-1	386.36	18098	51	8	44.65	Carbamidomethyl+C(11)	MVETALTPDACYPD	145	14	5	30.37	2	791.843
	CTRL-Rep-1	386.36	18098	51	8	44.65		IVLVDNK	27	7	5	44.56	2	400.743
	CTRL-Rep-1	386.36	18098	51	8	44.65	Carbamidomethyl+C(9)	FVYHLSDLCK	82	10	4	45.44	2	641.323
	CTRL-Rep-1	386.36	18098	51	8	44.65		ENISDPTSPLR	69	11	3	34.94	2	614.805
	CTRL-Rep-1	386.36	18098	51	8	44.65	Carbamidomethyl+C(3)	NKCYTAVVPLVYGGETK	128	17	4	41.35	4	475.494
	CTRL-Rep-1	386.36	18098	51	8	44.65	Phosphoryl STY(8)	ENISDPTSPLR	69	11	3	27.95	3	436.866
	CTRL-Rep-3	331.54	18098	34	5	30.82		SSEDPNEDIVER	46	12	19	137.16	2	695.306
	CTRL-Rep-3	331.54	18098	34	5	30.82	Carbamidomethyl+C(1)	CYTAVVPLVYGGETK	130	15	19	160.84	2	828.918
	CTRL-Rep-3	331.54	18098	34	5	30.82		ITSR	39	4	1	14.2	1	476.282
	CTRL-Rep-3	331.54	18098	34	5	30.82		ENISDPTSPLR	69	11	4	30.56	2	614.808
	CTRL-Rep-3	331.54	18098	34	5	30.82		IVLVDNK	27	7	5	55.61	1	800.485
	CTRL-Rep-4	315.7	18098	32	4	28.3		SSEDPNEDIVER	46	12	16	123.72	2	695.308
	CTRL-Rep-4	315.7	18098	32	4	28.3	Carbamidomethyl+C(1)	CYTAVVPLVYGGETK	130	15	15	150.86	2	828.917
	CTRL-Rep-4	315.7	18098	32	4	28.3		IVLVDNK	27	7	6	58.4	2	400.746
	CTRL-Rep-4	315.7	18098	32	4	28.3		ENISDPTSPLR	69	11	3	27.4	3	410.208
	POAG-Rep-1	313.57	18098	32	5	32.7		SSEDPNEDIVER	46	12	16	122.9	2	695.308
	POAG-Rep-1	313.57	18098	32	5	32.7	Carbamidomethyl+C(1)	CYTAVVPLVYGGETK	130	15	16	166.52	2	828.92
	POAG-Rep-1	313.57	18098	32	5	32.7	Carbamidomethyl+C(11)	MVETALTPDACYPD	145	14	3	22.79	2	791.845
	POAG-Rep-1	313.57	18098	32	5	32.7		ITSR	39	4	1	14.45	1	476.288
	POAG-Rep-1	313.57	18098	32	5	32.7		IVLVDNK	27	7	5	56.52	1	800.483
	POAG-Rep-2	277.25	18098	32	5	30.19		SSEDPNEDIVER	46	12	15	110.71	2	695.308
	POAG-Rep-2	277.25	18098	32	5	30.19	Carbamidomethyl+C(1)	CYTAVVPLVYGGETK	130	15	12	108.33	2	828.92
	POAG-Rep-2	277.25	18098	32	5	30.19		IVLVDNK	27	7	5	44.5	2	400.745
	POAG-Rep-2	277.25	18098	32	5	30.19		ITSR	39	4	1	14.35	1	476.283
	POAG-Rep-2	277.25	18098	32	5	30.19	Carbamidomethyl+C(9)	FVYHLSDLCK	82	10	5	66.88	3	427.876
	POAG-Rep-4	332.81	18098	37	6	31.45		SSEDPNEDIVER	46	12	18	121.74	2	695.308
	POAG-Rep-4	332.81	18098	37	6	31.45	Carbamidomethyl+C(1)	CYTAVVPLVYGGETK	130	15	14	138.33	2	828.917
	POAG-Rep-4	332.81	18098	37	6	31.45	Carbamidomethyl+C(9)	FVYHLSDLCK	82	10	7	44.33	3	427.877
	POAG-Rep-4	332.81	18098	37	6	31.45		ITSR	39	4	1	14.31	1	476.282
	POAG-Rep-4	332.81	18098	37	6	31.45		IVLVDNK	27	7	5	56	1	800.479
	POAG-Rep-4	332.81	18098	37	6	31.45	Carbamidomethyl+C(3)	NKCYTAVVPLVYGGETK	128	17	3	26.57	3	633.661
sp|P01834|IGKC_HUMAN Ig kappa chain C region OS=Homo sapiens GN=IGKC PE=1 SV=1	CTRL-Rep-1	435.09	11608	56	6	65.09	Carbamidomethyl+C(4)	VYACEVTHQGLSSPVTK	82	17	25	230.45	3	625.975
	CTRL-Rep-1	435.09	11608	56	6	65.09		VDNALQSGNSQESVTEQDSK	41	20	17	126.21	3	712.659
	CTRL-Rep-1	435.09	11608	56	6	65.09		VDNALQSGNSQESVTEQDSKDSTYSLSSTLTLSK	41	34	11	43.7	4	905.676
	CTRL-Rep-1	435.09	11608	56	6	65.09		TVAAPSVFIFPPSDEQLK	0	18	8	36.72	3	649.342
	CTRL-Rep-1	435.09	11608	56	6	65.09	Carbamidomethyl+C(2)	ACEVTHQGLSSPVTK	84	15	9	71.25	2	807.403
	CTRL-Rep-1	435.09	11608	56	6	65.09		VDNALQSGNSQESVTEQDSK	41	20	0	4.38	3	706.654
	CTRL-Rep-3	407.73	11608	44	4	45.28	Carbamidomethyl+C(4)	VYACEVTHQGLSSPVTK	82	17	29	244.49	3	625.977
	CTRL-Rep-3	407.73	11608	44	4	45.28		VDNALQSGNSQESVTEQDSK	41	20	25	132.91	3	712.655
	CTRL-Rep-3	407.73	11608	44	4	45.28	Carbamidomethyl+C(7)	SFNRGEC	99	7	6	61.63	2	435.179
	CTRL-Rep-3	407.73	11608	44	4	45.28		VQWKVDNALQSGNSQESVTEQDSK	37	24	3	36.96	3	893.087
	CTRL-Rep-4	384.1	11608	59	7	68.87	Carbamidomethyl+C(4)	VYACEVTHQGLSSPVTK	82	17	31	238.16	3	625.973
	CTRL-Rep-4	384.1	11608	59	7	68.87		VDNALQSGNSQESVTEQDSK	41	20	18	117.69	3	712.658
	CTRL-Rep-4	384.1	11608	59	7	68.87		TVAAPSVFIFPPSDEQLK	0	18	5	17.99	2	973.518
	CTRL-Rep-4	384.1	11608	59	7	68.87		DSTYSLSSTLTLSK	61	14	3	30.66	2	751.884
	CTRL-Rep-4	384.1	11608	59	7	68.87		VDNALQSGNSQESVTEQDSKDSTYSLSSTLTLSK	41	34	7	39.81	4	905.681
	CTRL-Rep-4	384.1	11608	59	7	68.87		VQWKVDNALQSGNSQESVTEQDSK	37	24	7	42.35	3	893.089
	CTRL-Rep-4	384.1	11608	59	7	68.87		SGNSQESVTEQDSK	47	14	1	7.28	2	748.337
	POAG-Rep-1	371.63	11608	46	4	48.11	Carbamidomethyl+C(4)	VYACEVTHQGLSSPVTK	82	17	28	215.26	3	625.974
	POAG-Rep-1	371.63	11608	46	4	48.11		VDNALQSGNSQESVTEQDSK	41	20	20	143.02	3	712.658
	POAG-Rep-1	371.63	11608	46	4	48.11		VDNALQSGNSQESVTEQDSKDSTYSLSSTLTLSK	41	34	5	12.14	4	905.68
	POAG-Rep-1	371.63	11608	46	4	48.11	Carbamidomethyl+C(2)	ACEVTHQGLSSPVTK	84	15	10	91.85	2	807.4
	POAG-Rep-2	434.63	11608	53	6	65.09	Carbamidomethyl+C(4)	VYACEVTHQGLSSPVTK	82	17	34	263.88	3	625.973
	POAG-Rep-2	434.63	11608	53	6	65.09		VDNALQSGNSQESVTEQDSK	41	20	14	132.88	3	712.658
	POAG-Rep-2	434.63	11608	53	6	65.09		TVAAPSVFIFPPSDEQLK	0	18	6	27.32	2	973.522
	POAG-Rep-2	434.63	11608	53	6	65.09		VDNALQSGNSQESVTEQDSKDSTYSLSSTLTLSK	41	34	4	12.03	4	905.675
	POAG-Rep-2	434.63	11608	53	6	65.09	Phosphoryl STY(4)	DSTYSLSSTLTLSK	61	14	3	38.11	4	396.436
	POAG-Rep-2	434.63	11608	53	6	65.09	Carbamidomethyl+C(2)	ACEVTHQGLSSPVTK	84	15	7	59.23	2	807.405
	POAG-Rep-4	238.87	11608	45	4	63.21		VDNALQSGNSQESVTEQDSK	41	20	16	166.54	3	712.659
	POAG-Rep-4	238.87	11608	45	4	63.21	Carbamidomethyl+C(8)	SGTASVVCLLNNFYPR	18	16	7	47.03	2	899.453
	POAG-Rep-4	238.87	11608	45	4	63.21		VDNALQSGNSQESVTEQDSKDSTYSLSSTLTLSK	41	34	5	17.71	4	905.673
	POAG-Rep-4	238.87	11608	45	4	63.21	Carbamidomethyl+C(4)	VYACEVTHQGLSSPVTK	82	17	24	229.56	3	625.972
sp|P30740|ILEU_HUMAN Leukocyte elastase inhibitor OS=Homo sapiens GN=SERPINB1 PE=1 SV=1	POAG-Rep-2	184.47	42741	27	7	19.79		LGVQDLFNSSK	290	11	5	46.51	2	604.319
	POAG-Rep-2	184.47	42741	27	7	19.79		ADLSGMSGAR	301	10	4	32.37	2	482.731
	POAG-Rep-2	184.47	42741	27	7	19.79		HNSSGSILFLGR	363	12	8	41.07	2	644.342
	POAG-Rep-2	184.47	42741	27	7	19.79		TYGADLASVDFQHASEDAR	110	19	5	40.38	3	684.977
	POAG-Rep-2	184.47	42741	27	7	19.79		DIFISK	311	6	1	14.93	2	361.707
	POAG-Rep-2	184.47	42741	27	7	19.79		GASYILK	80	7	3	41.49	2	376.218
	POAG-Rep-2	184.47	42741	27	7	19.79		MEQLSSANTR	0	10	4	44.46	3	379.521
sp|Q14641|INSL4_HUMAN Early placenta insulin-like peptide OS=Homo sapiens GN=INSL4 PE=1 SV=1	POAG-Rep-4	68.66	15445	9	4	26.62		KPLSEGQPSLK	94	11	5	27.8	3	395.224
	POAG-Rep-4	68.66	15445	9	4	26.62		TFTTTPGGWLLESGRPK	48	17	3	27.82	3	616.658
	POAG-Rep-4	68.66	15445	9	4	26.62		TFTTTPGGWLLESGRPKEMVSTSNNK	48	26	3	14.01	4	710.351
	POAG-Rep-4	68.66	15445	9	4	26.62		KPLSEGQ	94	7	0	1.77	2	379.708
sp|P13645|K1C10_HUMAN Keratin	CTRL-Rep-3	208.29	58827	35	8	23.8		ALEESNYELEGK	165	12	8	75.92	2	691.33
	CTRL-Rep-3	208.29	58827	35	8	23.8		ADLEMQIESLTEELAYLKK	266	19	4	17.37	3	742.046
	CTRL-Rep-3	208.29	58827	35	8	23.8	Carbamidomethyl+C(2)	YCVQLSQIQAQISALEEQLQQIR	399	23	9	44.87	3	916.147
	CTRL-Rep-3	208.29	58827	35	8	23.8		SLLEGEGSSGGGGR	450	14	3	22.22	2	631.806
	CTRL-Rep-3	208.29	58827	35	8	23.8		VTMQNLNDR	147	9	5	65.95	2	545.771
	CTRL-Rep-3	208.29	58827	35	8	23.8		SQYEQLAEQNR	322	11	5	27.55	2	683.323
	CTRL-Rep-3	208.29	58827	35	8	23.8		EWYEK	179	5	1	14.5	1	754.338
	CTRL-Rep-3	208.29	58827	35	8	23.8	Carbamidomethyl+C(26)	GSLGGGFSSGGFSGGSFSRGSSGGGCFGGSSGGYGGLGGFGGGSFR	40	46	5	22.58	5	807.145
sp|P04264|K2C1_HUMAN Keratin	CTRL-Rep-1	300.92	66038	52	12	23.45		IEISELNR	395	8	9	84.06	2	487.267
	CTRL-Rep-1	300.92	66038	52	12	23.45		SLDLDSIIAEVK	343	12	6	42.23	2	651.86
	CTRL-Rep-1	300.92	66038	52	12	23.45		THNLEPYFESFINNLR	223	16	7	40.73	3	665.326
	CTRL-Rep-1	300.92	66038	52	12	23.45		AEAESLYQSK	366	10	5	48.33	2	563.276
	CTRL-Rep-1	300.92	66038	52	12	23.45		SLNNQFASFIDK	185	12	5	25.81	2	692.344
	CTRL-Rep-1	300.92	66038	52	12	23.45		FLEQQNQVLQTK	199	12	4	39.22	2	738.396
	CTRL-Rep-1	300.92	66038	52	12	23.45		LDSELK	251	6	1	14.95	2	352.692
	CTRL-Rep-1	300.92	66038	52	12	23.45	Carbamidomethyl+C(5)	MSGECAPNVSVSVSTSHTTISGGGSR	492	26	5	28.97	3	855.738
	CTRL-Rep-1	300.92	66038	52	12	23.45		TNAENEFVTIK	277	11	3	27.95	2	633.322
	CTRL-Rep-1	300.92	66038	52	12	23.45		GSGGGSSGGSIGGR	602	14	3	38.15	2	546.764
	CTRL-Rep-1	300.92	66038	52	12	23.45		LNDLEDALQQAK	443	12	4	33.01	3	453.229
	CTRL-Rep-1	300.92	66038	52	12	23.45		WELLQQVDTSTR	211	12	5	41.14	3	492.589
	CTRL-Rep-3	337.89	66038	51	14	24.07		IEISELNR	395	8	7	58.92	2	487.266
	CTRL-Rep-3	337.89	66038	51	14	24.07		FLEQQNQVLQTK	199	12	7	72.91	2	738.396
	CTRL-Rep-3	337.89	66038	51	14	24.07		THNLEPYFESFINNLR	223	16	8	68.8	3	665.325
	CTRL-Rep-3	337.89	66038	51	14	24.07		LNDLEDALQQAK	443	12	5	38.64	2	679.351
	CTRL-Rep-3	337.89	66038	51	14	24.07		QISNLQQSISDAEQR	417	15	3	29.06	2	858.93
	CTRL-Rep-3	337.89	66038	51	14	24.07		AEAESLYQSK	366	10	4	30.25	2	563.281
	CTRL-Rep-3	337.89	66038	51	14	24.07		VIQR	403	4	1	14.2	1	515.324
	CTRL-Rep-3	337.89	66038	51	14	24.07		LDSELK	251	6	1	14.81	2	352.692
	CTRL-Rep-3	337.89	66038	51	14	24.07		GSGGGSSGGSIGGR	602	14	5	35.76	2	546.764
	CTRL-Rep-3	337.89	66038	51	14	24.07		SGGGFSSGSAGIINYQR	12	17	4	18.95	3	553.26
	CTRL-Rep-3	337.89	66038	51	14	24.07		YEELQITAGR	376	10	4	30.25	2	590.296
	CTRL-Rep-3	337.89	66038	51	14	24.07		HGDSVRNSK	386	9	4	33.93	2	500.252
	CTRL-Rep-3	337.89	66038	51	14	24.07		NKLNDLEDALQQAK	441	14	3	27.66	3	533.944
	CTRL-Rep-3	337.89	66038	51	14	24.07		SSGGSSSVKFVSTTYSGVTR	624	20	3	16.7	3	665.325
	CTRL-Rep-4	341.97	66038	53	11	22.05		IEISELNR	395	8	9	82.83	2	487.266
	CTRL-Rep-4	341.97	66038	53	11	22.05		THNLEPYFESFINNLR	223	16	14	67.77	3	665.325
	CTRL-Rep-4	341.97	66038	53	11	22.05		FLEQQNQVLQTK	199	12	5	35.49	2	738.397
	CTRL-Rep-4	341.97	66038	53	11	22.05		SLDLDSIIAEVK	343	12	7	49.61	2	651.859
	CTRL-Rep-4	341.97	66038	53	11	22.05		SLNNQFASFIDK	185	12	5	25.27	2	692.343
	CTRL-Rep-4	341.97	66038	53	11	22.05		QISNLQQSISDAEQR	417	15	8	28.92	2	858.929
	CTRL-Rep-4	341.97	66038	53	11	22.05		AQYEDIAQK	355	9	5	33.77	2	533.255
	CTRL-Rep-4	341.97	66038	53	11	22.05		LDSELK	251	6	1	14.75	2	352.692
	CTRL-Rep-4	341.97	66038	53	11	22.05		TLLEGEESR	483	9	5	62.02	2	517.265
	CTRL-Rep-4	341.97	66038	53	11	22.05		SGGGFSSGSAGIINYQR	12	17	6	18.82	3	553.261
	CTRL-Rep-4	341.97	66038	53	11	22.05	Carbamidomethyl+C(5)	MSGECAPNVSVSVSTSHTTISGGGSR	492	26	3	19.91	3	855.725
sp|P14618|KPYM_HUMAN Pyruvate kinase isozymes M1/M2 OS=Homo sapiens GN=PKM2 PE=1 SV=4	CTRL-Rep-1	225.41	57937	24	9	14.12	Carbamidomethyl+C(6)	NTGIICTIGPASR	43	13	9	52.41	2	680.355
	CTRL-Rep-1	225.41	57937	24	9	14.12		ITLDNAYMEK	141	10	3	37.66	2	599.298
	CTRL-Rep-1	225.41	57937	24	9	14.12		GSGTAEVELKK	125	11	3	27.95	2	559.805
	CTRL-Rep-1	225.41	57937	24	9	14.12		SVETLK	56	6	3	29.61	1	676.381
	CTRL-Rep-1	225.41	57937	24	9	14.12		IENHEGVR	270	8	3	44.85	2	477.247
	CTRL-Rep-1	225.41	57937	24	9	14.12		VLGEK	256	5	1	14.66	1	545.335
	CTRL-Rep-1	225.41	57937	24	9	14.12		KGDVVIVLTGWRPGSGFTNTMR	504	22	4	25.72	3	797.767
	CTRL-Rep-1	225.41	57937	24	9	14.12	Oxidation+M(12)	FDEILEASDGIMVAR	279	15	3	21.33	3	561.269
	CTRL-Rep-1	225.41	57937	24	9	14.12		GTAEVELKK	127	9	0	1.75	2	487.778
	CTRL-Rep-3	236.54	57937	22	6	12.05	Carbamidomethyl+C(6)	NTGIICTIGPASR	43	13	9	81.4	2	680.352
	CTRL-Rep-3	236.54	57937	22	6	12.05		ITLDNAYMEK	141	10	4	30.25	2	599.292
	CTRL-Rep-3	236.54	57937	22	6	12.05		DPVQEAWAEDVDLR	475	14	4	30.79	2	821.898
	CTRL-Rep-3	236.54	57937	22	6	12.05		SVETLK	56	6	5	46.82	1	676.381
[truncated: 2,155 more rows]
